# Supplementary material for: Transition-metal-free tunable regioselective [3+2] cycloaddition of diaryliodonium salts with 1,3-dicarbonyl derivatives
Source: Royal Society of Chemistry journal article supplement (doi:10.1039/d4cc06376g), 2025-01-01

## Supporting Information

### Transition-Metal-Free Tunable Regioselective [3+2] Cycloaddition of Diaryliodonium salts with 1, 3-Dicarbonyl and Its Derivatives

Yixi Yang<sup>a#</sup>, Shaoqing Wang<sup>a#</sup>, Lin Wang<sup>a</sup>, Na Dang<sup>a</sup>, Tao Qin<sup>\*a</sup>, Heye Zhou<sup>a</sup>, Bin Liu<sup>\*a,b</sup>

<sup>a</sup>College of Materials and Chemical Engineering, Key Laboratory of Inorganic Nonmetallic Crystalline and Energy Conversion Materials, China Three Gorges University, Yichang, Hubei 443002, PR China China

<sup>b</sup>Hubei Three Gorges Laboratory, Yichang 443007

E-mail: qintao@ctgu.edu.cn; liubin1@ctgu.edu.cn

## Table of Contents

|                                                                                       |            |
|---------------------------------------------------------------------------------------|------------|
| <b>1. General Information.....</b>                                                    | <b>S3</b>  |
| <b>2. Detailed Optimization Studies.....</b>                                          | <b>S4</b>  |
| <b>3. Experimental Procedures.....</b>                                                | <b>S6</b>  |
| <b>4. Analytical data of New Compounds.....</b>                                       | <b>S9</b>  |
| <b>5. Mechanistic investigation.....</b>                                              | <b>S25</b> |
| <b>6. References.....</b>                                                             | <b>S30</b> |
| <b>7. <sup>1</sup>H, <sup>13</sup>C, <sup>19</sup>F Spectra of New Compounds.....</b> | <b>S31</b> |

## 1. General Information

All reactions were monitored by thin layer chromatography (TLC) using Macherey-Nagel 0.20 mm silica gel 60 plates. Flash column chromatography was performed on silica gel 60 (particle size 300-400 mesh ASTM, purchased from Taizhou, China).  $^1\text{H}$ ,  $^{13}\text{C}$  spectra were recorded with Bruker 400 MHz (Avance-400) and JNM-ECZL 600 MHz instrument. All  $^1\text{H}$  NMR data are reported in  $\delta$  units, parts per million (ppm), and were measured relative to the residual proton signal in the deuterated solvent at 7.26 ppm ( $\text{CDCl}_3$ ) and 2.50 ppm ( $\text{DMSO-d}_6$ ). All  $^{13}\text{C}$  NMR spectra are decoupled and reported in ppm relative to the solvent signal at 77.16 ppm ( $\text{CDCl}_3$ ) and 39.52 ppm ( $\text{DMSO-d}_6$ ). High-resolution mass spectra HRMS (ESI-TOF) were recorded on Bruker microtof. Compounds were visualized by irradiation with UV light, or stained with iodine/silica gel, or potassium permanganate. Preparatory thin-layer chromatography (Prep-TLC) was performed on silica gel GF with UV 254 ( $20 \times 20$  cm, 1000 microns, from Yantai Jiang you Silica Gel Development Co., Ltd.) and visualized with UV light.

**Materials.** Reaction solvents THF and toluene were distilled over sodium and stored under nitrogen atmosphere. While DCM, Dioxane and  $\text{CH}_3\text{CN}$  was distilled over  $\text{CaH}_2$  and stored under nitrogen atmosphere. All diaryliodonium salts **1** in the article were known and prepared according to the previously reported procedures.<sup>[1]</sup> All other commercial reagents and solvents were purchased from Energy-Chemical Ltd, and used as received unless otherwise noted.

## 2. Detailed Optimization Studies

**Table S1. Screening of reaction conditions for synthesis of 3a.<sup>a</sup>**

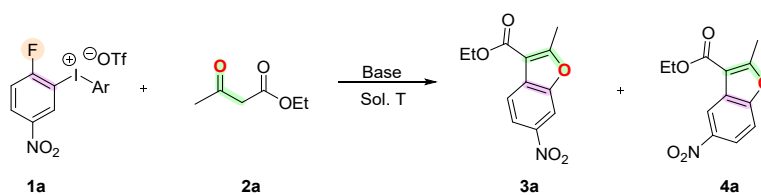

| Entry | 2a      | Base                                      | Sol.               | 3a (%) <sup>b</sup> | 4a (%) <sup>b</sup> | Ratio 3a/4a |
|-------|---------|-------------------------------------------|--------------------|---------------------|---------------------|-------------|
| 1     | 1.5 eq. | Cs <sub>2</sub> CO <sub>3</sub> (2.0 eq.) | CH <sub>3</sub> CN | 32                  | 17                  | 2:1         |
| 2     | 1.5 eq. | Cs <sub>2</sub> CO <sub>3</sub> (2.0 eq.) | THF                | 35                  | 8                   | 4:1         |
| 3     | 1.5 eq. | Cs <sub>2</sub> CO <sub>3</sub> (2.0 eq.) | Dioxane            | 21                  | 14                  | 3:2         |
| 4     | 1.5 eq. | Cs <sub>2</sub> CO <sub>3</sub> (2.0 eq.) | Toluene            | 16                  | 4                   | 4:1         |
| 5     | 1.5 eq. | Cs <sub>2</sub> CO <sub>3</sub> (2.0 eq.) | DCM                | 18                  | 2                   | 9:1         |
| 6     | 1.5 eq. | Cs <sub>2</sub> CO <sub>3</sub> (2.0 eq.) | DMF                | 49                  | 7                   | 7:1         |
| 7     | 1.5 eq. | Cs <sub>2</sub> CO <sub>3</sub> (2.0 eq.) | DMSO               | 65                  | 7                   | 9:1         |
| 8     | 1.5 eq. | K <sub>2</sub> CO <sub>3</sub> (2.0 eq.)  | DMSO               | 68                  | 6                   | 11:1        |
| 9     | 1.5 eq. | Na <sub>2</sub> CO <sub>3</sub> (2.0 eq.) | DMSO               | 45                  | 3                   | 15:1        |
| 10    | 1.5 eq. | KHCO <sub>3</sub> (2.0 eq.)               | DMSO               | 63                  | 4                   | 16:1        |
| 11    | 1.5 eq. | Et <sub>3</sub> N (2.0 eq.)               | DMSO               | 10                  | trace               | --          |
| 12    | 1.5 eq. | DMAP (2.0 eq.)                            | DMSO               | trace               | trace               | --          |
| 13    | 1.5 eq. | NaOH (2.0 eq.)                            | DMSO               | 60                  | 6                   | 10:1        |
| 14    | 1.5 eq. | KHCO <sub>3</sub> (3.0 eq.)               | DMSO               | 74                  | 5                   | 15:1        |
| 15    | 2.0 eq. | KHCO <sub>3</sub> (3.0 eq.)               | DMSO               | 82                  | 4                   | 20:1        |

<sup>a</sup> Reaction conditions: **1a** (0.1 mmol), **2** (x mmol), base (y equiv), solvent (0.1 M), rt, 12 h. <sup>b</sup> <sup>1</sup>H NMR yields using 1,3,5-trimethoxybenzene as internal standard.

**Table S2. Screening of reaction conditions for synthesis of 4a.<sup>a</sup>**

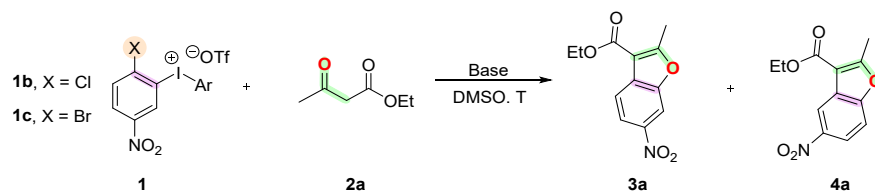

| Entry | 1  | Base                                      | T   | 3a (%) <sup>b</sup> | 4a (%) <sup>b</sup> | Ratio 3a/4a |
|-------|----|-------------------------------------------|-----|---------------------|---------------------|-------------|
| 1     | 1b | KHCO <sub>3</sub> (3.0 eq.)               | rt  | 9                   | 18                  | 1:2         |
| 2     | 1c | KHCO <sub>3</sub> (3.0 eq.)               | rt  | 6                   | 30                  | 1:5         |
| 3     | 1c | Cs <sub>2</sub> CO <sub>3</sub> (2.0 eq.) | rt  | 7                   | 42                  | 1:6         |
| 4     | 1c | K <sub>2</sub> CO <sub>3</sub> (3.0 eq.)  | rt  | 9                   | 36                  | 1:4         |
| 5     | 1c | Na <sub>2</sub> CO <sub>3</sub> (3.0 eq.) | rt  | 7                   | 35                  | 1:4         |
| 6     | 1c | NaHCO <sub>3</sub> (3.0)                  | rt  | 8                   | 22                  | 1:3         |
| 7     | 1c | DBU (3.0 eq.)                             | rt  | 4                   | 16                  | 1:4         |
| 8     | 1c | <sup>t</sup> BuOK (3.0 eq.)               | rt  | trace               | 32                  | --          |
| 9     | 1c | NaH (3.0 eq.)                             | rt  | 2                   | 35                  | 1:17        |
| 10    | 1c | NaH (3.0 eq.)                             | 40  | 2                   | 36                  | 1: 18       |
| 11    | 1c | NaH (3.0 eq.)                             | 60  | 2                   | 41                  | 1: 20       |
| 12    | 1c | NaH (3.0 eq.)                             | 80  | 2                   | 43                  | 1: 22       |
| 13    | 1c | NaH (3.0 eq.)                             | 100 | 3                   | 60                  | 1:20        |

<sup>a</sup> Reaction conditions: **1** (0.1 mmol), **2a** (0.2 mmol), base (3 equiv), DMSO (0.1 M), rt, 12 h. <sup>b</sup> <sup>1</sup>H NMR yields using 1,3,5-trimethoxybenzene as internal standard.

### 3. Experimental Procedures

#### a) General procedure for 3

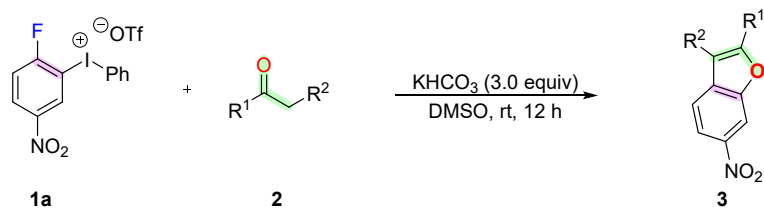

A flame-dried screw-cap reaction tube equipped with a Teflon-coated magnetic stir bar was charged with diaryliodonium salt **1a** (49.6 mg, 0.1 mmol, 1.0 equiv), and anhydrous  $\text{KHCO}_3$  (0.3 mmol, 30 mg, 3.0 equiv.). Then the sealed tube was wrapped with rubber stopper and connected to the vacuum, ultra dry DMSO (1 mL) and ketones derivatives **2** (0.2 mmol, 2.0 equiv) were added under argon atmosphere, then the reaction vessel was allowed to stir at rt for 12 h. Until the reaction was complete as indicated by TLC. The reaction mixture was then quenched with  $\text{H}_2\text{O}$ , extracted with ethyl acetate (3×5 mL) and the combined organic layers were dried over  $\text{Na}_2\text{SO}_4$ , and concentrated in vacuo. The resulting crude product was purified by flash column chromatography on silica gel to obtain product **3**.

#### b) General procedure for 4

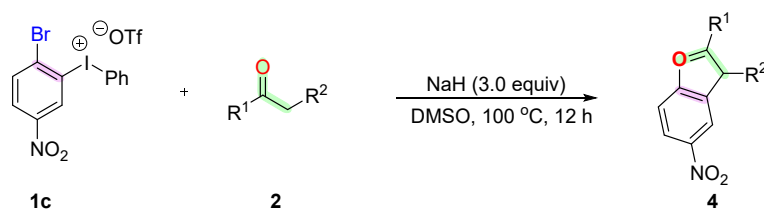

A flame-dried screw-cap reaction tube equipped with a Teflon-coated magnetic stir bar was charged with diaryliodonium salt **1c** (55.3 mg, 0.1 mmol, 1.0 equiv), and  $\text{NaH}$  (0.3 mmol, 3.0 equiv). Then the sealed tube was wrapped with rubber stopper and connected to the vacuum, ultra dry DMSO (1 mL) and ketones derivatives **2** (0.2 mmol, 2.0 equiv) were added under argon atmosphere, then the reaction vessel was allowed to stir at 100 °C for 12 h. Until the reaction was complete as indicated by TLC. The reaction mixture was then quenched with  $\text{H}_2\text{O}$ , extracted with ethyl acetate (3×5 mL) and the combined organic layers were dried over  $\text{Na}_2\text{SO}_4$ , and concentrated in vacuo. The resulting crude product was purified by flash column chromatography on silica gel to obtain product **4**.

### c) A gram scale synthesis and late-stage functionalization

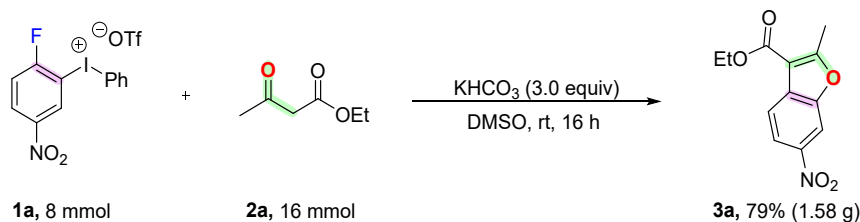

A flame-dried screw-cap reaction tube equipped with a Teflon-coated magnetic stir bar was charged with diaryliodonium salt **1a** (3.94 g, 8 mmol, 1.0 equiv), and anhydrous  $\text{KHCO}_3$  (24 mmol, 2.4 g, 3.0 equiv.). Then the sealed tube was wrapped with rubber stopper and connected to the vacuum, ultra dry DMSO (30 mL) and ketones derivatives **2a** (2.08 g, 16 mmol, 2.0 equiv) were added under argon atmosphere, then the reaction vessel was allowed to stir at rt for 16 h. Until the reaction was complete as indicated by TLC. The reaction mixture was then quenched with  $\text{H}_2\text{O}$ , extracted with ethyl acetate ( $3 \times 80$  mL) and the combined organic layers were dried over  $\text{Na}_2\text{SO}_4$ , and concentrated in vacuo. The resulting crude product was purified by flash column chromatography on silica gel to obtain product **3a** (1.58g, 79%).

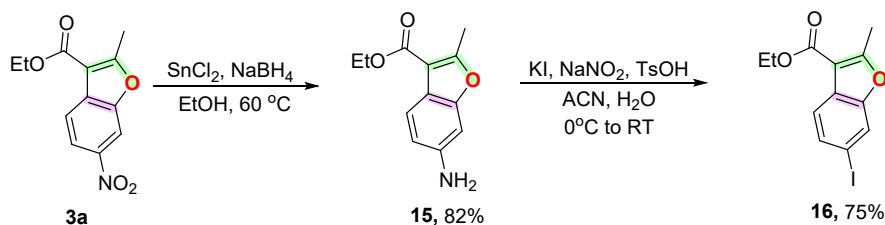

Added **3a** (249 mg, 1.0 mmol) and  $\text{NaBH}_4$  (18.9 mg, 0.5 mmol, 0.5 equiv) in 20 mL of ethyl alcohol followed by dropwise addition of 5M  $\text{SnCl}_2$  solution (5 ml) at 60 °C and the mixture was allowed to stir for 1 h at 60 °C, until the reaction was complete as indicated by TLC. The reaction mixture was quenched with  $\text{H}_2\text{O}$  and adjusted to pH 10.5 with  $\text{KOH}$ . The solution was extracted with Ethyl ether ( $3 \times 30$  mL) and the combined organic layers were dried over  $\text{Na}_2\text{SO}_4$ , and concentrated in vacuo. The resulting crude product was purified by flash column chromatography on silica gel to obtain product **15** (179.6 mg, 82%).

Added **15** (43.8 mg, 0.2 mmol, 1.0equiv) and *p*-toluenesulfonic acid monohydrate (114.1 mg, 3.0 equiv) in acetonitrile (3 mL). The reaction was cooled to 0 °C before a solution of  $\text{NaNO}_2$  (27.6 mg, 2.0 equiv) and  $\text{KI}$  (58 mg, 2.5 equiv) in water (1 mL) was added drop wise. Upon

complete addition of the reagents, the mixture was allowed to reach room temperature where it was stirred for 24 hours. Until the reaction was complete as indicated by TLC. The reaction mixture was quenched with H<sub>2</sub>O, extracted with CH<sub>2</sub>Cl<sub>2</sub> (3×10 mL) and the combined organic layers were dried over Na<sub>2</sub>SO<sub>4</sub>, and concentrated in vacuo. The resulting crude product was purified by flash column chromatography on silica gel to obtain product **16** (49.5 mg, 75%).

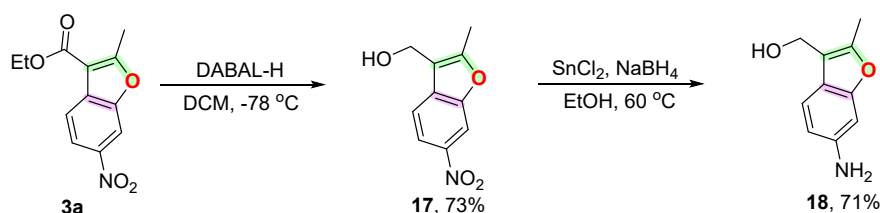

Added **3a** (43.8 mg, 0.5 mmol, 1.0equiv) in 2 mL of CH<sub>2</sub>Cl<sub>2</sub> and the mixture was allowed to stir at -78 °C. Next, a solution of diisobutylaluminium hydride (1.25 mL, 1.25 mmol, 2.5 equiv) in toluene (1.0 M) was carefully added using a syringe. The reaction mixture was slowly warmed to room temperature and stirred for 1 hour. The reaction was quenched with saturated aqueous NH<sub>4</sub>Cl solution. The organic layer was separated and the aqueous layer was extracted with CH<sub>2</sub>Cl<sub>2</sub> (10 mL). The combined organic phase was washed with brine, dried over Na<sub>2</sub>SO<sub>4</sub>, and concentrated in vacuo. The resulting crude product was purified by flash column chromatography on silica gel to obtain product **17** (75.6 mg, 73%).

Added **17** (41.4 mg, 0.2 mmol, 1.0equiv) and NaBH<sub>4</sub> (3.8 mg, 0.1 mmol, 0.5 equiv) in 4 mL of ethyl alcohol followed by dropwise addition of 5M SnCl<sub>2</sub> solution (1 mL, 1.0 mmol, 5.0 equiv) at 60 °C and the mixture was allowed to stir for 1 h at 60 °C, until the reaction was complete as indicated by TLC. The reaction mixture was quenched with H<sub>2</sub>O and adjusted to pH 10.5 with KOH. The solution was extracted with ethyl ether (3×10 mL) and the combined organic layers were dried over Na<sub>2</sub>SO<sub>4</sub>, and concentrated in vacuo. The resulting crude product was purified by flash column chromatography on silica gel to obtain product **18** (25.2 mg, 71%).



#### 4. Analytical data of New Compounds

##### Ethyl 2-methyl-6-nitrobenzofuran-3-carboxylate (**3a**)<sup>2</sup>

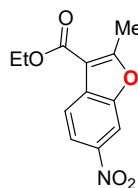

The crude was purified by flash chromatography using Petroleum ether/ Ethyl acetate 50:1 to afford **3a** as white solid (20.4 mg, 82% yield), TLC:  $R_f = 0.25$  (Petroleum ether : Ethyl acetate = 50:1) [UV]. <sup>1</sup>H NMR (400 MHz, Chloroform-*d*)  $\delta$  8.32 (s, 1H), 8.22 (d,  $J = 8.8$  Hz, 1H), 8.06 (d,  $J = 8.8$  Hz, 1H), 4.44 (q,  $J = 7.2$  Hz, 2H), 2.84 (s, 3H), 1.46 (t,  $J = 7.2$  Hz, 3H). <sup>13</sup>C NMR (100 MHz, Chloroform-*d*)  $\delta$  168.7, 163.5, 152.3, 145.1, 132.4, 121.9, 119.7, 109.8, 107.4, 61.0, 15.0, 14.5. HRMS (ESI-TOF) ( $m/z$ ): Calcd for  $C_{12}H_{10}NO_5$  ( $[M - H]^-$ ), 248.0564, found, 248.0561.

##### Methyl 2-methyl-6-nitrobenzofuran-3-carboxylate (**3b**)

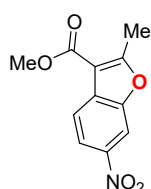

The crude was purified by flash chromatography using Petroleum ether/ Ethyl acetate 50:1 to afford **3b** as white solid (18.6 mg, 79% yield), TLC:  $R_f = 0.25$  (Petroleum ether : Ethyl acetate = 50:1) [UV]. <sup>1</sup>H NMR (400 MHz, Chloroform-*d*)  $\delta$  8.34 (s, 1H), 8.23 (d,  $J = 8.8$  Hz, 1H), 8.07 (d,  $J = 8.8$  Hz, 1H), 3.98 (s, 3H), 2.85 (s, 3H). <sup>13</sup>C NMR (100 MHz,  $CDCl_3$ )  $\delta$  168.8, 163.9, 152.4, 145.2, 132.3, 121.9, 119.7, 109.7, 107.5, 52.0, 15.0. HRMS (ESI-TOF) ( $m/z$ ): Calcd for  $C_{11}H_8NO_5$  ( $[M - H]^-$ ), 234.0408, found, 234.0408.

##### Isopropyl 2-methyl-6-nitrobenzofuran-3-carboxylate (**3c**)

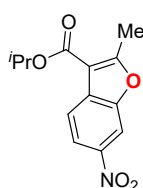

The crude was purified by flash chromatography using Petroleum ether/ Ethyl acetate 50:1 to afford **3c** as white solid (18.7 mg, 71% yield), TLC:  $R_f = 0.20$  (Petroleum ether : Ethyl acetate = 50:1) [UV]. <sup>1</sup>H NMR (400 MHz, Chloroform-*d*)  $\delta$  8.33 (s, 1H), 8.23 (d,  $J = 8.8$  Hz, 1H), 8.07 (d,  $J = 8.8$  Hz, 1H), 5.38 – 5.25 (m, 1H), 2.84 (s, 3H), 1.44 (d,  $J = 6.0$  Hz, 6H). <sup>13</sup>C NMR (100 MHz,  $CDCl_3$ )  $\delta$  168.6, 163.1, 152.4, 145.1, 132.6, 121.9, 119.6, 110.1, 107.7, 68.7, 22.3, 15.0. HRMS (ESI-TOF) ( $m/z$ ): Calcd for  $C_{13}H_{12}NO_5$  ( $[M - H]^-$ ), 262.0721, found, 262.0718.

##### Tert-butyl 2-methyl-6-nitrobenzofuran-3-carboxylate (**3d**)

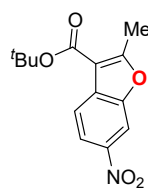

The crude was purified by flash chromatography using Petroleum ether/Ethyl acetate 50:1 to afford **3d** as white solid (17.7 mg, 64% yield), TLC:  $R_f = 0.20$  (Petroleum ether : Ethyl acetate = 50:1) [UV]. <sup>1</sup>H NMR (400 MHz, Chloroform-*d*)

$\delta$  8.30 (s, 1H), 8.21 (d,  $J = 8.8$  Hz, 1H), 8.03 (d,  $J = 8.8$  Hz, 1H), 2.81 (s, 3H), 1.65 (s, 9H).  $^{13}\text{C}$  NMR (100 MHz, Chloroform-*d*)  $\delta$  168.3, 162.7, 152.3, 145.0, 132.7, 121.9, 119.5, 111.0, 107.3, 82.2, 28.6, 15.0. HRMS (ESI-TOF) ( $m/z$ ): Calcd for  $\text{C}_{14}\text{H}_{14}\text{NO}_5$  ( $[\text{M} - \text{H}]^-$ ), 276.0877, found, 276.0876.

#### Allyl 2-methyl-6-nitrobenzofuran-3-carboxylate (**3e**)

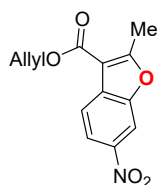

The crude was purified by flash chromatography using Petroleum ether/ Ethyl acetate 50:1 to afford **3e** as white solid (17.5 mg, 71% yield), TLC:  $R_f = 0.18$  (Petroleum ether : Ethyl acetate = 50:1) [UV].  $^1\text{H}$  NMR (400 MHz, Chloroform-*d*)  $\delta$  8.34 (s, 1H), 8.23 (d,  $J = 8.8$  Hz, 1H), 8.08 (d,  $J = 8.8$  Hz, 1H), 6.15 – 6.02

(m, 1H), 5.48 – 5.33 (m, 2H), 4.89 (d,  $J = 6.0$  Hz, 2H), 2.86 (s, 3H).  $^{13}\text{C}$  NMR (100 MHz, Chloroform-*d*)  $\delta$  169.0, 163.2, 152.4, 145.2, 132.3, 132.0, 121.9, 119.7, 119.2, 109.6, 107.5, 65.7, 15.1. HRMS (ESI-TOF) ( $m/z$ ): Calcd for  $\text{C}_{13}\text{H}_{10}\text{NO}_5$  ( $[\text{M} - \text{H}]^-$ ), 260.0564, found, 260.0564.

#### Ethyl 2-(tert-butyl)-6-nitrobenzofuran-3-carboxylate (**3f**)

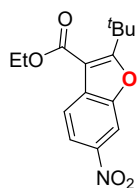

The crude was purified by flash chromatography using Petroleum ether/ Ethyl acetate 50:1 to afford **3f** as white solid (17.5 mg, 43% yield), TLC:  $R_f = 0.20$  (Petroleum ether : Ethyl acetate = 50:1) [UV].  $^1\text{H}$  NMR (400 MHz, Chloroform-*d*)  $\delta$  8.37 (s, 1H), 8.21 (d,  $J = 8.8$  Hz, 1H), 8.04 (d,  $J = 8.8$  Hz, 1H), 4.46 (q,  $J = 7.2$

Hz, 2H), 1.57 (s, 9H), 1.48 (t,  $J = 7.2$  Hz, 3H).  $^{13}\text{C}$  NMR (100 MHz,  $\text{CDCl}_3$ )  $\delta$  177.3, 163.3, 151.0, 145.0, 133.7, 122.3, 119.4, 108.9, 107.6, 61.6, 35.9, 28.2, 14.5. HRMS (ESI-TOF) ( $m/z$ ): Calcd for  $\text{C}_{15}\text{H}_{16}\text{NO}_5$  ( $[\text{M} - \text{H}]^-$ ), 290.1034, found, 290.1032.

#### Ethyl 6-nitro-2-propylbenzofuran-3-carboxylate (**3g**)

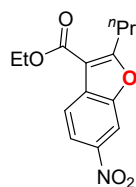

The crude was purified by flash chromatography using Petroleum ether/ Ethyl acetate 50:1 to afford **3g** as white solid (20.0 mg, 72% yield), TLC:  $R_f = 0.20$  (Petroleum ether : Ethyl acetate = 50:1) [UV].  $^1\text{H}$  NMR (600 MHz, Chloroform-*d*)

$\delta$  8.35 (s, 1H), 8.24 (d,  $J = 8.4$  Hz, 1H), 8.09 (d,  $J = 8.4$  Hz, 1H), 4.44 (q,  $J = 7.2$  Hz, 2H), 3.22 (t,  $J = 7.2$  Hz, 2H), 1.91 – 1.80 (m, 2H), 1.46 (t,  $J = 7.2$  Hz, 3H), 1.03 (t,  $J = 7.2$  Hz, 3H).  $^{13}\text{C}$  NMR (100 MHz,  $\text{CDCl}_3$ )  $\delta$  172.4, 163.5, 152.4, 145.1, 132.5, 122.0, 119.6, 109.5, 107.5, 61.0, 30.5, 21.4, 14.5, 14.0. HRMS (ESI-TOF) ( $m/z$ ): Calcd for  $\text{C}_{14}\text{H}_{14}\text{NO}_5$  ( $[\text{M} - \text{H}]^-$ ), 276.0877, found, 276.0878.

### Ethyl 2-isopropyl-6-nitrobenzofuran-3-carboxylate (**3h**)

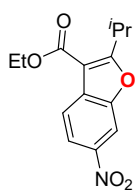

The crude was purified by flash chromatography using Petroleum ether/ Ethyl acetate 50:1 to afford **3h** as white solid (16.6 mg, 60% yield), TLC:  $R_f = 0.20$  (Petroleum ether : Ethyl acetate = 50:1) [UV].  $^1\text{H NMR}$  (400 MHz, Chloroform-*d*)  $\delta$  8.36 (s, 1H), 8.23 (d,  $J = 8.8$  Hz, 1H), 8.08 (d,  $J = 8.8$  Hz, 1H), 4.44 (q,  $J = 7.2$  Hz, 2H), 4.11 – 4.00 (m, 1H), 1.46 (t,  $J = 7.2$  Hz, 3H), 1.40 (d,  $J = 7.2$  Hz, 6H).  $^{13}\text{C NMR}$  (100 MHz,  $\text{CDCl}_3$ )  $\delta$  176.5, 163.4, 152.3, 145.1, 132.5, 122.4, 119.6, 107.9, 107.6, 61.0, 28.1, 20.5, 14.5. **HRMS** (ESI-TOF) ( $m/z$ ): Calcd for  $\text{C}_{14}\text{H}_{14}\text{NO}_5$  ( $[\text{M} - \text{H}]^-$ ), 276.0877, found, 276.0876.

### Ethyl 2-ethyl-6-nitrobenzofuran-3-carboxylate (**3i**)

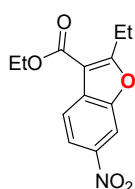

The crude was purified by flash chromatography using Petroleum ether/ Ethyl acetate 50:1 to afford **3i** as white solid (16.1 mg, 61% yield), TLC:  $R_f = 0.24$  (Petroleum ether : Ethyl acetate = 50:1) [UV].  $^1\text{H NMR}$  (400 MHz, Chloroform-*d*)  $\delta$  8.34 (s, 1H), 8.23 (d,  $J = 8.8$  Hz, 1H), 8.08 (d,  $J = 8.8$  Hz, 1H), 4.44 (q,  $J = 7.2$  Hz, 2H), 3.27 (q,  $J = 7.6$  Hz, 2H), 1.46 (t,  $J = 7.2$  Hz, 3H), 1.39 (t,  $J = 7.6$  Hz, 3H).  $^{13}\text{C NMR}$  (100 MHz, Chloroform-*d*)  $\delta$  173.4, 163.4, 152.4, 145.4, 132.5, 122.0, 119.6, 108.9, 107.5, 61.0, 22.3, 14.5, 11.9. **HRMS** (ESI-TOF) ( $m/z$ ): Calcd for  $\text{C}_{13}\text{H}_{12}\text{NO}_5$  ( $[\text{M} - \text{H}]^-$ ), 262.0721, found, 262.0718.

### Ethyl 6-nitro-2-phenylbenzofuran-3-carboxylate (**3j**)

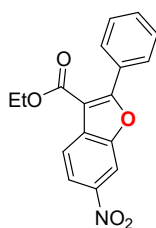

The crude was purified by flash chromatography using Petroleum ether/ Ethyl acetate 30:1 to afford **3j** as white solid (22.4 mg, 72% yield), TLC:  $R_f = 0.26$  (Petroleum ether : Ethyl acetate = 30:1) [UV].  $^1\text{H NMR}$  (400 MHz, Chloroform-*d*)  $\delta$  8.43 (s, 1H), 8.27 (d,  $J = 8.8$  Hz, 1H), 8.18 (d,  $J = 8.8$  Hz, 1H), 8.06 (d,  $J = 7.6$  Hz, 2H), 7.56-7.53 (m, 3H), 4.44 (q,  $J = 7.2$  Hz, 2H), 1.43 (t,  $J = 7.2$  Hz, 3H).  $^{13}\text{C NMR}$  (100 MHz, Chloroform-*d*)  $\delta$  165.4, 163.1, 152.5, 145.6, 133.3, 131.5, 129.9, 128.6, 128.4, 123.0, 119.8, 109.3, 107.7, 61.4, 14.4. **HRMS** (ESI-TOF) ( $m/z$ ): Calcd for  $\text{C}_{17}\text{H}_{14}\text{NO}_5$  ( $[\text{M} + \text{H}]^+$ ), 312.0866, found, 312.0868.

### Ethyl 6-nitro-2-(p-tolyl)benzofuran-3-carboxylate (**3k**)

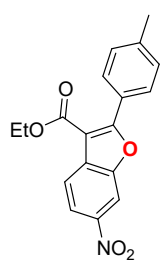

The crude was purified by flash chromatography using Petroleum ether/ Ethyl acetate 30:1 to afford **3k** as white solid (19.8 mg, 61% yield), TLC:  $R_f = 0.25$  (Petroleum ether : Ethyl acetate = 30:1) [UV].  $^1\text{H NMR}$  (400 MHz, Chloroform-*d*)  $\delta$  8.40 (s, 1H), 8.25 (d,  $J = 8.8$  Hz, 1H), 8.15 (d,  $J = 8.8$  Hz, 1H), 7.97 (d,  $J = 8.0$  Hz, 2H), 7.33 (d,  $J = 8.0$  Hz, 2H), 4.44 (q,  $J = 7.2$  Hz, 2H), 2.45 (s, 3H), 1.44 (t,  $J = 7.2$  Hz, 3H).  $^{13}\text{C NMR}$  (100 MHz,  $\text{CDCl}_3$ )  $\delta$  165.7, 163.2, 152.3, 145.4, 142.2, 133.4, 129.8, 129.2, 125.7, 122.8, 119.7, 108.7, 107.6, 61.3, 21.8, 14.4. **HRMS** (ESI-TOF) ( $m/z$ ): Calcd for  $\text{C}_{18}\text{H}_{16}\text{NO}_5$  ( $[\text{M} + \text{H}]^+$ ), 326.1023, found, 326.1024.

### Ethyl 6-nitro-2-(m-tolyl)benzofuran-3-carboxylate (**3l**)

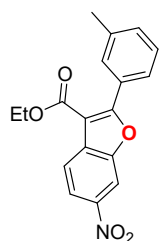

The crude was purified by flash chromatography using Petroleum ether/ Ethyl acetate 30:1 to afford **3l** as white solid (19.5 mg, 60% yield), TLC:  $R_f = 0.25$  (Petroleum ether : Ethyl acetate = 30:1) [UV].  $^1\text{H NMR}$  (400 MHz, Chloroform-*d*)  $\delta$  8.42 (s, 1H), 8.27 (d,  $J = 8.8$  Hz, 1H), 8.18 (d,  $J = 8.8$  Hz, 1H), 7.90 – 7.82 (m, 2H), 7.45 – 7.33 (m, 2H), 4.44 (q,  $J = 7.2$  Hz, 2H), 2.47 (s, 3H), 1.42 (t,  $J = 7.2$  Hz, 3H).  $^{13}\text{C NMR}$  (100 MHz,  $\text{CDCl}_3$ )  $\delta$  165.6, 163.1, 152.4, 145.5, 138.2, 133.4, 132.3, 130.3, 128.5, 128.3, 127.1, 122.9, 119.7, 109.2, 107.7, 61.3, 21.6, 14.3. **HRMS** (ESI-TOF) ( $m/z$ ): Calcd for  $\text{C}_{18}\text{H}_{16}\text{NO}_5$  ( $[\text{M} + \text{H}]^+$ ), 326.1023, found, 326.1029.

### Ethyl 2-(4-fluorophenyl)-6-nitrobenzofuran-3-carboxylate (**3m**)

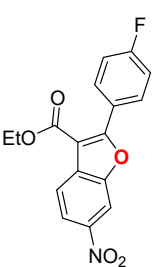

The crude was purified by flash chromatography using Petroleum ether/ Ethyl acetate 20:1 to afford **3m** as white solid (16.1 mg, 49% yield), TLC:  $R_f = 0.25$  (Petroleum ether : Ethyl acetate = 20:1) [UV].  $^1\text{H NMR}$  (400 MHz, Chloroform-*d*)  $\delta$  8.43 (s, 1H), 8.28 (d,  $J = 8.8$  Hz, 1H), 8.18 (d,  $J = 8.8$  Hz, 1H), 8.15 – 8.06 (m, 2H), 7.22 (t,  $J = 8.8$  Hz, 2H), 4.45 (q,  $J = 7.2$  Hz, 2H), 1.44 (t,  $J = 7.2$  Hz, 3H).  $^{13}\text{C NMR}$  (100 MHz,  $\text{CDCl}_3$ )  $\delta$  164.7 (d,  $J = 252.0$  Hz), 164.4, 163.1, 152.4, 145.7, 133.2, 132.6 (d,  $J = 9.0$  Hz), 124.8 (d,  $J = 3.0$  Hz), 123.1, 119.8, 115.8 (d,  $J = 21.0$  Hz), 109.5, 107.7, 61.5, 14.4.  $^{19}\text{F NMR}$  (376 MHz,  $\text{CDCl}_3$ )  $\delta$  -107.15 (s, 1F). **HRMS** (ESI-TOF) ( $m/z$ ): Calcd for  $\text{C}_{17}\text{H}_{13}\text{FNO}_5$  ( $[\text{M} + \text{H}]^+$ ), 330.0772, found, 330.0774.

### Ethyl 2-(4-chlorophenyl)-6-nitrobenzofuran-3-carboxylate (**3n**)

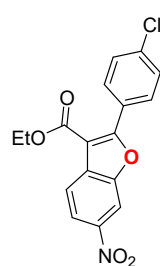

The crude was purified by flash chromatography using Petroleum ether/ Ethyl acetate 20:1 to afford **3n** as white solid (14.8 mg, 43% yield), TLC:  $R_f = 0.25$  (Petroleum ether : Ethyl acetate = 20:1) [UV].  $^1\text{H NMR}$  (400 MHz, Chloroform-*d*)  $\delta$  8.43 (s, 1H), 8.28 (d,  $J = 8.8$  Hz, 1H), 8.19 (d,  $J = 8.8$  Hz, 1H), 8.05 (d,  $J = 8.8$  Hz, 2H), 7.51 (d,  $J = 8.8$  Hz, 2H), 4.46 (q,  $J = 7.2$  Hz, 2H), 1.45 (t,  $J = 7.2$  Hz, 3H).  $^{13}\text{C NMR}$  (100 MHz,  $\text{CDCl}_3$ )  $\delta$  164.0, 163.0, 152.4, 145.8, 137.8, 133.1, 131.2, 128.8, 127.0, 123.1, 119.9, 109.7, 107.8, 61.5, 14.4. **HRMS** (ESI-TOF) ( $m/z$ ): Calcd for  $\text{C}_{17}\text{H}_{13}\text{ClNO}_5$  ( $[\text{M} + \text{H}]^+$ ), 346.0477, found, 346.0476.

### Ethyl 2-(4-bromophenyl)-6-nitrobenzofuran-3-carboxylate (**3o**)

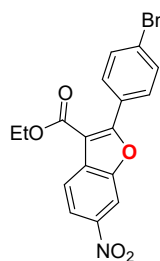

The crude was purified by flash chromatography using Petroleum ether/ Ethyl acetate 20:1 to afford **3o** as white solid (19.8 mg, 51% yield), TLC:  $R_f = 0.26$  (Petroleum ether : Ethyl acetate = 20:1) [UV].  $^1\text{H NMR}$  (600 MHz, Chloroform-*d*)  $\delta$  8.44 (d,  $J = 2.4$  Hz, 1H), 8.28 (dd,  $J = 8.4, 2.4$  Hz, 1H), 8.19 (d,  $J = 8.4$  Hz, 1H), 7.98 (d,  $J = 8.4$  Hz, 2H), 7.67 (d,  $J = 8.4$  Hz, 2H), 4.46 (q,  $J = 7.2$  Hz, 2H), 1.45 (t,  $J = 7.2$  Hz, 3H).  $^{13}\text{C NMR}$  (150 MHz,  $\text{CDCl}_3$ )  $\delta$  164.1, 163.0, 152.5, 145.8, 133.1, 131.8, 131.3, 127.5, 126.4, 123.2, 119.9, 109.8, 107.8, 61.5, 14.4. **HRMS** (ESI-TOF) ( $m/z$ ): Calcd for  $\text{C}_{17}\text{H}_{13}\text{BrNO}_5$  ( $[\text{M} + \text{H}]^+$ ), 389.9972, found, 289.9974.

### 2-Methyl-6-nitrobenzofuran-3-carbonitrile (**3p**)

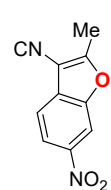

The crude was purified by flash chromatography using Petroleum ether/ Ethyl acetate 30:1 to afford **3p** as light yellow solid (10.5 mg, 52% yield), TLC:  $R_f = 0.26$  (Petroleum ether : Ethyl acetate = 30:1) [UV].  $^1\text{H NMR}$  (400 MHz, Chloroform-*d*)  $\delta$  8.40 (s, 1H), 8.30 (d,  $J = 8.8$  Hz, 1H), 7.75 (d,  $J = 8.8$  Hz, 1H), 2.76 (s, 3H).  $^{13}\text{C NMR}$  (100 MHz, Chloroform-*d*)  $\delta$  170.0, 152.6, 146.1, 131.8, 120.3, 119.8, 112.0, 108.2, 92.4, 14.5. **HRMS** (ESI-TOF) ( $m/z$ ): Calcd for  $\text{C}_{10}\text{H}_5\text{N}_2\text{O}_3$  ( $[\text{M} - \text{H}]^-$ ), 201.0306, found, 201.0299.

### 1-(2-Methyl-6-nitrobenzofuran-3-yl)ethan-1-one (**3q**)

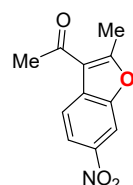

The crude was purified by flash chromatography using Petroleum ether/ Ethyl acetate 50:1 to afford **3q** as white solid (17.5 mg, 80% yield), TLC:  $R_f = 0.26$  (Petroleum ether : Ethyl acetate = 50:1) [UV].  $^1\text{H NMR}$  (400 MHz, Chloroform-*d*)  $\delta$

8.32 (s, 1H), 8.24 (d,  $J = 8.8$  Hz, 1H), 8.11 (d,  $J = 8.8$  Hz, 1H), 2.86 (s, 3H), 2.66 (s, 3H).  $^{13}\text{C}$  NMR (100 MHz, Chloroform- $d$ )  $\delta$  193.2, 167.5, 152.3, 145.2, 132.2, 121.8, 119.8, 118.0, 107.4, 31.2, 16.0. HRMS (ESI-TOF) (m/z): Calcd for  $\text{C}_{11}\text{H}_8\text{NO}_4$  ( $[\text{M} - \text{H}]^-$ ), 218.0459, found, 218.0454.

### 1-(2-Ethyl-6-nitrobenzofuran-3-yl)propan-1-one (3r)

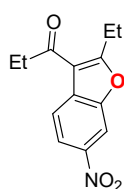

The crude was purified by flash chromatography using Petroleum ether/ Ethyl acetate 50:1 to afford **3r** as white solid (12.6 mg, 51% yield), TLC:  $R_f = 0.26$  (Petroleum ether : Ethyl acetate = 50:1) [UV].  $^1\text{H}$  NMR (600 MHz, Chloroform- $d$ )  $\delta$  8.35 (s, 1H), 8.23 (d,  $J = 9.0$  Hz, 1H), 8.08 (d,  $J = 9.0$  Hz, 1H), 3.25 (q,  $J = 7.8$  Hz, 2H), 2.99 (q,  $J = 7.2$  Hz, 2H), 1.42 (t,  $J = 7.2$  Hz, 3H), 1.28 (t,  $J = 7.8$  Hz, 3H).  $^{13}\text{C}$  NMR (100 MHz, Chloroform- $d$ )  $\delta$  196.4, 172.4, 152.7, 145.0, 132.2, 121.8, 119.7, 116.7, 107.6, 36.6, 23.1, 11.9, 7.8. HRMS (ESI-TOF) (m/z): Calcd for  $\text{C}_{13}\text{H}_{12}\text{NO}_4$  ( $[\text{M} - \text{H}]^-$ ), 246.0772, found, 246.0768.

### 7-Nitro-3,4-dihydrodibenzo[b,d]furan-1(2H)-one (3s)

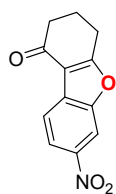

The crude was purified by flash chromatography using Petroleum ether/ Ethyl acetate 10:1 to afford **3s** as white solid (11.6 mg, 50% yield), TLC:  $R_f = 0.26$  (Petroleum ether : Ethyl acetate = 10:1) [UV].  $^1\text{H}$  NMR (600 MHz, Chloroform- $d$ )  $\delta$  8.39 (d,  $J = 1.8$  Hz, 1H), 8.28 (dd,  $J = 1.8, 8.4$  Hz, 1H), 8.17 (d,  $J = 8.4$  Hz, 1H), 3.13 (t,  $J = 6.0$  Hz, 2H), 2.66 (t,  $J = 6.0$  Hz, 2H), 2.37 – 2.30 (m, 2H).  $^{13}\text{C}$  NMR (150 MHz, Chloroform- $d$ )  $\delta$  194.1, 175.2, 153.5, 145.6, 129.8, 121.9, 120.5, 116.6, 107.8, 37.9, 24.2, 22.3. HRMS (ESI-TOF) (m/z): Calcd for  $\text{C}_{12}\text{H}_{10}\text{NO}_4$  ( $[\text{M} + \text{H}]^+$ ), 232.0604, found, 232.0604.

### 3,3-Dimethyl-7-nitro-3,4-dihydrodibenzo[b,d]furan-1(2H)-one (3t)

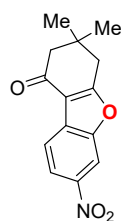

The crude was purified by flash chromatography using Petroleum ether/ Ethyl acetate 30:1 to afford **3t** as white solid (16.3 mg, 63% yield), TLC:  $R_f = 0.26$  (Petroleum ether : Ethyl acetate = 30:1) [UV].  $^1\text{H}$  NMR (400 MHz, Chloroform- $d$ )  $\delta$  8.38 (s, 1H), 8.27 (d,  $J = 8.8$  Hz, 1H), 8.15 (d,  $J = 8.8$  Hz, 1H), 2.99 (s, 2H), 2.53 (s, 2H), 1.23 (s, 6H).  $^{13}\text{C}$  NMR (100 MHz, Chloroform- $d$ )  $\delta$  193.6, 174.7, 153.8, 145.5, 129.6, 121.8, 120.4, 115.4, 107.9, 52.3, 38.1, 35.5, 28.8. HRMS (ESI-TOF) (m/z): Calcd for  $\text{C}_{14}\text{H}_{14}\text{NO}_4$  ( $[\text{M} + \text{H}]^+$ ), 260.0917, found, 260.0918.

### Ethyl 2-methyl-6-nitro-5-(trifluoromethyl)benzofuran-3-carboxylate (**3u**)

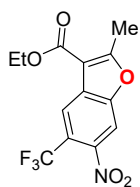

The crude was purified by flash chromatography using Petroleum ether/ Ethyl acetate 50:1 to afford **3u** as white solid (20.9 mg, 66% yield), TLC:  $R_f = 0.26$  (Petroleum ether : Ethyl acetate = 50:1) [UV].  $^1\text{H NMR}$  (400 MHz, Chloroform-*d*)  $\delta$  8.44 (s, 1H), 8.04 (s, 1H), 4.46 (q,  $J = 7.2$  Hz, 2H), 2.87 (s, 3H), 1.47 (t,  $J = 7.2$  Hz, 3H).  $^{13}\text{C NMR}$  (100 MHz, Chloroform-*d*)  $\delta$  169.2, 162.8, 153.1, 145.2, 130.0, 122.6 (d,  $J = 272.0$  Hz), 121.9 (q,  $J = 6.0$  Hz), 120.5 (d,  $J = 34.0$  Hz), 110.1, 109.3, 61.4, 14.9, 14.4.  $^{19}\text{F NMR}$  (376 MHz, Chloroform-*d*)  $\delta$  -58.58 (s, 3F). HRMS (ESI-TOF) ( $m/z$ ): Calcd for  $\text{C}_{13}\text{H}_9\text{F}_3\text{NO}_5$  ( $[\text{M} - \text{H}]^-$ ), 316.0438, found, 316.0434.

### Ethyl 5-fluoro-2-methyl-6-nitrobenzofuran-3-carboxylate (**3v**)

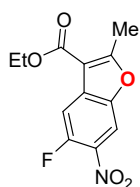

The crude was purified by flash chromatography using Petroleum ether/ Ethyl acetate 50:1 to afford **3v** as white solid (14.7 mg, 55% yield), TLC:  $R_f = 0.25$  (Petroleum ether : Ethyl acetate = 50:1) [UV].  $^1\text{H NMR}$  (600 MHz, Chloroform-*d*)  $\delta$  8.19 (d,  $J = 6.0$  Hz, 1H), 7.82 (d,  $J = 10.8$  Hz, 1H), 4.44 (q,  $J = 7.2$  Hz, 2H), 2.84 (s, 3H), 1.46 (t,  $J = 7.2$  Hz, 3H).  $^{13}\text{C NMR}$  (150 MHz,  $\text{CDCl}_3$ )  $\delta$  170.1, 163.0, 153.3 (d,  $J = 258.0$  Hz), 147.8, 134.3 (d,  $J = 9.0$  Hz), 132.6 (d,  $J = 10.5$  Hz), 110.2 (d,  $J = 25.5$  Hz), 110.0 (d,  $J = 4.5$  Hz), 109.0 (d,  $J = 1.5$  Hz), 61.2, 15.1, 14.5.  $^{19}\text{F NMR}$  (376 MHz, Chloroform-*d*)  $\delta$  -122.64 (s, 1F). HRMS (ESI-TOF) ( $m/z$ ): Calcd for  $\text{C}_{12}\text{H}_9\text{FNO}_5$  ( $[\text{M} - \text{H}]^-$ ), 266.0470, found, 266.0467.

### Ethyl 4-fluoro-2-methyl-6-nitrobenzofuran-3-carboxylate (**3w**)

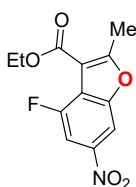

The crude was purified by flash chromatography using Petroleum ether/ Ethyl acetate 50:1 to afford **3w** as white solid (17.9 mg, 67% yield), TLC:  $R_f = 0.25$  (Petroleum ether : Ethyl acetate = 50:1) [UV].  $^1\text{H NMR}$  (600 MHz, Chloroform-*d*)  $\delta$  8.18 (s, 1H), 7.92 (d,  $J = 9.6$  Hz, 1H), 4.25 (q,  $J = 7.2$  Hz, 2H), 2.82 (s, 3H), 1.42 (t,  $J = 7.2$  Hz, 3H).  $^{13}\text{C NMR}$  (100 MHz,  $\text{CDCl}_3$ )  $\delta$  168.1, 162.8, 155.7, 154.0 (d,  $J = 9.7$  Hz), 153.1, 145.1, 120.6 (d,  $J = 19.1$  Hz), 107.2 (d,  $J = 27.0$  Hz), 104.0, 61.4, 14.9, 14.3.  $^{19}\text{F NMR}$  (376 MHz, Chloroform-*d*)  $\delta$  -108.02 (s, 1F). HRMS (ESI-TOF) ( $m/z$ ): Calcd for  $\text{C}_{12}\text{H}_9\text{FNO}_5$  ( $[\text{M} - \text{H}]^-$ ), 266.0470, found, 266.0469.

### Ethyl 4,5-difluoro-2-methyl-6-nitrobenzofuran-3-carboxylate (**3x**)

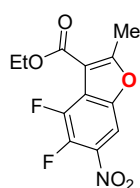

The crude was purified by flash chromatography using Petroleum ether/ Ethyl acetate 50:1 to afford **3x** as white solid (10.0 mg, 35% yield), TLC:  $R_f = 0.25$  (Petroleum ether : Ethyl acetate = 50:1) [UV].  $^1\text{H NMR}$  (400 MHz, Chloroform-*d*)  $\delta$  8.02 (s, 1H), 4.42 (q,  $J = 7.2$  Hz, 2H), 2.82 (s, 3H), 1.43 (t,  $J = 7.2$  Hz, 3H).  $^{13}\text{C NMR}$  (100 MHz,  $\text{CDCl}_3$ )  $\delta$  169.4, 162.1, 147.7 (d,  $J = 9.0$  Hz), 144.8 (dd,  $J = 93.0, 15.0$  Hz), 142.2 (dd,  $J = 92.0, 15.0$  Hz), 129.2, 121.0, 109.8, 104.2 (t,  $J = 4.0$  Hz), 61.6, 15.0, 14.3.  $^{19}\text{F NMR}$  (376 MHz, Chloroform-*d*)  $\delta$  -132.74 (d,  $J = 18.8$  Hz, 1F), -148.41 (d,  $J = 18.8$  Hz, 1F). **HRMS** (ESI-TOF) (m/z): Calcd for  $\text{C}_{12}\text{H}_{10}\text{F}_2\text{NO}_5$  ( $[\text{M} + \text{H}]^+$ ), 286.0522, found, 286.0520.

### Ethyl 2-methyl-5-nitrobenzofuran-3-carboxylate (**4a**)<sup>[2]</sup>

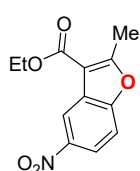

The crude was purified by flash chromatography using Petroleum ether/ Ethyl acetate 50:1 to afford **4a** as white solid (15.1 mg, 60% yield), TLC:  $R_f = 0.25$  (Petroleum ether : Ethyl acetate = 50:1) [UV].  $^1\text{H NMR}$  (400 MHz, Chloroform-*d*)  $\delta$  8.85 (s, 1H), 8.22 (d,  $J = 8.8$  Hz, 1H), 7.52 (d,  $J = 8.8$  Hz, 1H), 4.46 (q,  $J = 7.2$  Hz, 2H), 2.83 (s, 3H), 1.47 (t,  $J = 7.2$  Hz, 3H).  $^{13}\text{C NMR}$  (100 MHz,  $\text{CDCl}_3$ )  $\delta$  166.7, 163.5, 156.3, 145.1, 127.1, 120.5, 118.6, 111.4, 110.4, 61.1, 14.7, 14.6. **HRMS** (ESI-TOF) (m/z): Calcd for  $\text{C}_{12}\text{H}_{10}\text{NO}_5$  ( $[\text{M} - \text{H}]^-$ ), 248.0564, found, 248.0562.

### Methyl 2-methyl-5-nitrobenzofuran-3-carboxylate (**4b**)

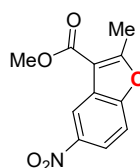

The crude was purified by flash chromatography using Petroleum ether/ Ethyl acetate 50:1 to afford **4b** as white solid (12.9 mg, 53% yield), TLC:  $R_f = 0.26$  (Petroleum ether : Ethyl acetate = 50:1) [UV].  $^1\text{H NMR}$  (600 MHz, Chloroform-*d*)  $\delta$  8.84 (s, 1H), 8.23 (d,  $J = 8.4$  Hz, 1H), 7.52 (d,  $J = 8.4$  Hz, 1H), 4.00 (s, 3H), 2.83 (s, 3H).  $^{13}\text{C NMR}$  (100 MHz, Chloroform-*d*)  $\delta$  166.9, 163.9, 156.4, 145.1, 126.9, 120.5, 118.5, 111.4, 110.0, 52.1, 14.7. **HRMS** (ESI-TOF) (m/z): Calcd for  $\text{C}_{11}\text{H}_8\text{NO}_5$  ( $[\text{M} - \text{H}]^-$ ), 234.0408, found, 234.0410.

### Isopropyl 2-methyl-5-nitrobenzofuran-3-carboxylate (**4c**)

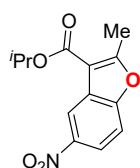

The crude was purified by flash chromatography using Petroleum ether/ Ethyl acetate 50:1 to afford **4c** as white solid (10.5 mg, 41% yield), TLC:  $R_f = 0.26$  (Petroleum ether : Ethyl acetate = 50:1) [UV].  $^1\text{H NMR}$  (400 MHz, Chloroform-*d*)



$\delta$  8.86 (s, 1H), 8.22 (d,  $J = 8.8$  Hz, 1H), 7.51 (d,  $J = 8.8$  Hz, 1H), 5.36 – 5.28 (m, 1H), 2.82 (s, 3H), 1.46 (d,  $J = 6.4$  Hz, 6H).  $^{13}\text{C}$  NMR (100 MHz, Chloroform- $d$ )  $\delta$  166.5, 163.0, 156.3, 145.1, 127.2, 120.4, 118.6, 111.3, 110.4, 68.8, 22.2, 14.7. HRMS (ESI-TOF) ( $m/z$ ): Calcd for  $\text{C}_{13}\text{H}_{12}\text{NO}_5$  ( $[\text{M} - \text{H}]^-$ ), 262.0721, found, 262.0720.

#### Tert-butyl 2-methyl-5-nitrobenzofuran-3-carboxylate (4d)

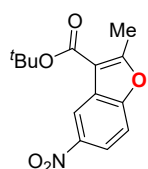

The crude was purified by flash chromatography using Petroleum ether/ Ethyl acetate 50:1 to afford **4d** as white solid (11.6 mg, 39% yield), TLC:  $R_f = 0.26$  (Petroleum ether : Ethyl acetate = 50:1) [UV].  $^1\text{H}$  NMR (400 MHz, Chloroform- $d$ )  $\delta$  8.85 (s, 1H), 8.21 (d,  $J = 8.8$  Hz, 1H), 7.49 (d,  $J = 8.8$  Hz, 1H), 2.80 (s, 3H), 1.67 (s, 9H).  $^{13}\text{C}$  NMR (100 MHz, Chloroform- $d$ )  $\delta$  166.2, 162.7, 156.3, 145.0, 127.3, 120.3, 118.6, 111.3, 111.2, 82.3, 28.5, 14.6. HRMS (ESI-TOF) ( $m/z$ ): Calcd for  $\text{C}_{14}\text{H}_{14}\text{NO}_5$  ( $[\text{M} - \text{H}]^-$ ), 276.0877, found, 276.0877.

#### Allyl 2-methyl-5-nitrobenzofuran-3-carboxylate (4e)

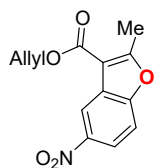

The crude was purified by flash chromatography using Petroleum ether/ Ethyl acetate 50:1 to afford **4e** as white solid (10.7 mg, 42% yield), TLC:  $R_f = 0.20$  (Petroleum ether : Ethyl acetate = 50:1) [UV].  $^1\text{H}$  NMR (400 MHz, Chloroform- $d$ )  $\delta$  8.89 (s, 1H), 8.25 (d,  $J = 8.8$  Hz, 1H), 7.55 (d,  $J = 8.8$  Hz, 1H), 6.18 – 6.02 (m, 1H), 5.53 – 5.36 (m, 2H), 4.94 (d,  $J = 5.6$  Hz, 2H), 2.86 (s, 3H).  $^{13}\text{C}$  NMR (100 MHz, Chloroform- $d$ )  $\delta$  167.0, 163.1, 156.3, 145.2, 132.0, 127.0, 120.5, 119.2, 118.5, 111.4, 109.9, 65.7, 14.6. HRMS (ESI-TOF) ( $m/z$ ): Calcd for  $\text{C}_{13}\text{H}_{10}\text{NO}_5$  ( $[\text{M} - \text{H}]^-$ ), 260.0564 found, 260.0562.

#### Ethyl 2-(tert-butyl)-5-nitrobenzofuran-3-carboxylate (4f)

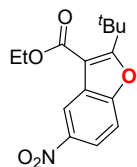

The crude was purified by flash chromatography using Petroleum ether/ Ethyl acetate 50:1 to afford **4f** as white solid (11.6 mg, 40% yield), TLC:  $R_f = 0.20$  (Petroleum ether : Ethyl acetate = 50:1) [UV].  $^1\text{H}$  NMR (400 MHz, Chloroform- $d$ )  $\delta$  8.85 (s, 1H), 8.22 (d,  $J = 8.8$  Hz, 1H), 7.53 (d,  $J = 8.8$  Hz, 1H), 4.48 (q,  $J = 7.2$  Hz, 2H), 1.56 (s, 9H), 1.50 (t,  $J = 7.2$  Hz, 3H).  $^{13}\text{C}$  NMR (100 MHz, Chloroform- $d$ )  $\delta$  175.2, 163.2, 155.0, 144.9, 128.2, 120.23, 119.0, 111.5, 109.2, 61.3, 35.6, 28.3, 14.5. HRMS (ESI-TOF) ( $m/z$ ): Calcd for  $\text{C}_{15}\text{H}_{18}\text{NO}_5$  ( $[\text{M} + \text{H}]^+$ ), 292.1179 found, 292.1180

#### Ethyl 5-nitro-2-propylbenzofuran-3-carboxylate (**4g**)

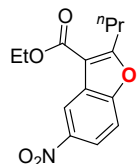

The crude was purified by flash chromatography using Petroleum ether/ Ethyl acetate 50:1 to afford **4g** as white solid (10.8 mg, 39% yield), TLC:  $R_f = 0.2$  (Petroleum ether : Ethyl acetate = 50:1) [UV].  $^1\text{H NMR}$  (400 MHz, Chloroform-*d*)  $\delta$  8.87 (s, 1H), 8.23 (d,  $J = 8.8$  Hz, 1H), 7.52 (d,  $J = 8.8$  Hz, 1H), 4.46 (q,  $J = 7.2$  Hz, 2H), 3.21 (t,  $J = 7.6$  Hz, 2H), 1.84 (q,  $J = 7.6$  Hz, 2H), 1.48 (t,  $J = 7.2$  Hz, 3H), 1.03 (t,  $J = 7.2$  Hz, 3H).  $^{13}\text{C NMR}$  (100 MHz, Chloroform-*d*)  $\delta$  170.4, 163.4, 156.4, 145.0, 127.1, 120.4, 118.7, 111.4, 109.8, 61.0, 30.2, 21.4, 14.5, 14.0. **HRMS** (ESI-TOF) ( $m/z$ ): Calcd for  $\text{C}_{14}\text{H}_{14}\text{NO}_5$  ( $[\text{M} - \text{H}]^-$ ), 276.0877, found, 276.0875.

#### Ethyl 2-isopropyl-5-nitrobenzofuran-3-carboxylate (**4h**)

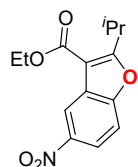

The crude was purified by flash chromatography using Petroleum ether/ Ethyl acetate 50:1 to afford **4h** as white solid (15.2 mg, 55% yield), TLC:  $R_f = 0.20$  (Petroleum ether : Ethyl acetate = 50:1) [UV].  $^1\text{H NMR}$  (400 MHz, Chloroform-*d*)  $\delta$  8.86 (s, 1H), 8.22 (d,  $J = 8.8$  Hz, 1H), 7.53 (d,  $J = 8.8$  Hz, 1H), 4.45 (q,  $J = 7.2$  Hz, 2H), 4.12 – 3.98 (m, 1H), 1.48 (t,  $J = 7.2$  Hz, 3H), 1.40 (d,  $J = 7.2$  Hz, 6H).  $^{13}\text{C NMR}$  (100 MHz, Chloroform-*d*)  $\delta$  174.5, 163.4, 156.3, 145.0, 127.1, 122.1, 120.4, 118.8, 111.5, 107.6, 61.0, 27.8, 20.6, 14.5. **HRMS** (ESI-TOF) ( $m/z$ ): Calcd for  $\text{C}_{14}\text{H}_{14}\text{O}_5$  ( $[\text{M} - \text{H}]^-$ ), 276.0877, found, 276.0876.

#### Ethyl 2-ethyl-5-nitrobenzofuran-3-carboxylate (**4i**)

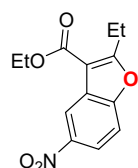

The crude was purified by flash chromatography using Petroleum ether/ Ethyl acetate 50:1 to afford **4i** as white solid (16.1 mg, 61% yield), TLC:  $R_f = 0.25$  (Petroleum ether : Ethyl acetate = 50:1) [UV].  $^1\text{H NMR}$  (600 MHz, Chloroform-*d*)  $\delta$  8.87 (s, 1H), 8.23 (d,  $J = 9.0$  Hz, 1H), 7.53 (d,  $J = 9.0$  Hz, 1H), 4.47 (q,  $J = 7.2$  Hz, 2H), 3.26 (q,  $J = 7.8$  Hz, 2H), 1.48 (t,  $J = 7.2$  Hz, 3H), 1.39 (t,  $J = 7.8$  Hz, 3H).  $^{13}\text{C NMR}$  (150 MHz, Chloroform-*d*)  $\delta$  171.4, 163.4, 156.4, 145.1, 127.1, 120.4, 118.7, 111.5, 109.2, 61.1, 22.0, 14.5, 12.0. **HRMS** (ESI-TOF) ( $m/z$ ): Calcd for  $\text{C}_{13}\text{H}_{12}\text{NO}_5$  ( $[\text{M} - \text{H}]^-$ ), 262.0721, found, 262.0719.

#### Ethyl 5-nitro-2-(*m*-tolyl)benzofuran-3-carboxylate (**4j**)

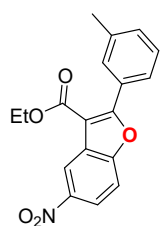

The crude was purified by flash chromatography using Petroleum ether/ Ethyl acetate 30:1 to afford **4j** as white solid (11.7 mg, 36% yield), TLC:  $R_f = 0.26$  (Petroleum ether : Ethyl acetate = 30:1) [UV].  $^1\text{H NMR}$  (400 MHz, Chloroform-*d*)  $\delta$  8.98 (s, 1H), 8.29 (d,  $J = 9.2$  Hz, 1H), 7.89 – 7.85 (m, 2H), 7.62 (d,  $J = 9.2$  Hz, 1H), 7.45 – 7.33 (m, 2H), 4.47 (q,  $J = 7.2$  Hz, 2H), 2.46 (s, 3H), 1.45 (t,  $J = 7.2$  Hz, 3H).  $^{13}\text{C NMR}$  (100 MHz, Chloroform-*d*)  $\delta$  163.9, 163.0, 156.4, 145.2, 138.2, 132.1, 130.2, 128.5, 128.3, 128.1, 127.1, 121.1, 119.6, 111.7, 109.5, 61.4, 21.6, 14.4. **HRMS** (ESI-TOF) ( $m/z$ ): Calcd for  $\text{C}_{18}\text{H}_{16}\text{NO}_5$  ( $[\text{M} + \text{H}]^+$ ), 326.1023 found, 326.1018.

#### Ethyl 5-nitro-2-(*p*-tolyl)benzofuran-3-carboxylate (**4k**)

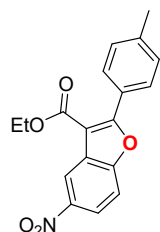

The crude was purified by flash chromatography using Petroleum ether/ Ethyl acetate 30:1 to afford **4k** as white solid (13.7 mg, 42% yield), TLC:  $R_f = 0.26$  (Petroleum ether : Ethyl acetate = 30:1) [UV].  $^1\text{H NMR}$  (400 MHz, Chloroform-*d*)  $\delta$  8.96 (s, 1H), 8.28 (d,  $J = 8.8$  Hz, 1H), 7.98 (d,  $J = 8.4$  Hz, 2H), 7.61 (d,  $J = 8.8$  Hz, 1H), 7.33 (d,  $J = 8.4$  Hz, 2H), 4.47 (q,  $J = 7.2$  Hz, 2H), 2.45 (s, 3H), 1.47 (t,  $J = 7.2$  Hz, 3H).  $^{13}\text{C NMR}$  (100 MHz, Chloroform-*d*)  $\delta$  164.0, 163.1, 156.3, 141.9, 129.7, 129.4, 129.2, 128.6, 125.7, 121.0, 119.5, 111.6, 109.1, 61.4, 21.8, 14.4. **HRMS** (ESI-TOF) ( $m/z$ ): Calcd for  $\text{C}_{18}\text{H}_{16}\text{NO}_5$  ( $[\text{M} + \text{H}]^+$ ), 326.1023 found, 326.1025.

#### Ethyl 2-(4-fluorophenyl)-5-nitrobenzofuran-3-carboxylate (**4l**)

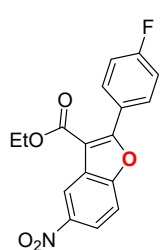

The crude was purified by flash chromatography using Petroleum ether/ Ethyl acetate 20:1 to afford **4l** as white solid (13.5 mg, 41% yield), TLC:  $R_f = 0.26$  (Petroleum ether : Ethyl acetate = 20:1) [UV].  $^1\text{H NMR}$  (400 MHz, Chloroform-*d*)  $\delta$  8.97 (s, 1H), 8.30 (d,  $J = 9.2$  Hz, 1H), 8.15 - 8.11 (m, 2H), 7.62 (d,  $J = 9.2$  Hz, 1H), 7.22 (t,  $J = 8.8$  Hz, 2H), 4.48 (q,  $J = 7.2$  Hz, 2H), 1.47 (t,  $J = 7.2$  Hz, 3H).  $^{13}\text{C NMR}$  (100 MHz, Chloroform-*d*)  $\delta$  164.6 (d,  $J = 251.0$  Hz), 163.0, 162.7, 156.3, 145.3, 132.1 (d,  $J = 9.0$  Hz), 127.9, 124.7 (d,  $J = 3.0$  Hz), 121.3, 119.7, 115.7 (d,  $J = 21.0$  Hz), 111.7, 109.6, 61.5, 14.4.  $^{19}\text{F NMR}$  (376 MHz, Chloroform-*d*)  $\delta$  -107.51 (s, 1F). **HRMS** (ESI-TOF) ( $m/z$ ): Calcd for  $\text{C}_{17}\text{H}_{13}\text{FNO}_5$  ( $[\text{M} + \text{H}]^+$ ), 330.0772 found, 330.0769.

#### Ethyl 2-(4-chlorophenyl)-5-nitrobenzofuran-3-carboxylate (**4m**)

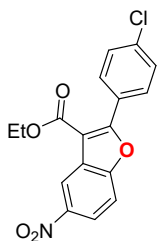

The crude was purified by flash chromatography using Petroleum ether/ Ethyl acetate 20:1 to afford **4m** as white solid (16.2 mg, 47% yield), TLC:  $R_f = 0.26$  (Petroleum ether : Ethyl acetate = 20:1) [UV].  **$^1\text{H NMR}$**  (400 MHz, Chloroform-*d*)  $\delta$  8.98 (s, 1H), 8.31 (d,  $J = 8.8$  Hz, 1H), 8.07 (d,  $J = 8.8$  Hz, 2H), 7.63 (d,  $J = 8.8$  Hz, 1H), 7.50 (d,  $J = 8.8$  Hz, 2H), 4.48 (q,  $J = 7.2$  Hz, 2H), 1.48 (t,  $J = 7.2$  Hz, 3H).  **$^{13}\text{C NMR}$**  (100 MHz, Chloroform-*d*)  $\delta$  162.9, 162.4, 156.3, 145.3, 137.6, 131.1, 128.8, 127.9, 127.0, 121.4, 119.7, 111.8, 110.1, 61.6, 14.4. **HRMS** (ESI-TOF) ( $m/z$ ): Calcd for  $\text{C}_{17}\text{H}_{13}\text{ClNO}_5$  ( $[\text{M} + \text{H}]^+$ ), 346.0477, found, 346.0475

#### Ethyl 2-(4-bromophenyl)-5-nitrobenzofuran-3-carboxylate (**4n**)

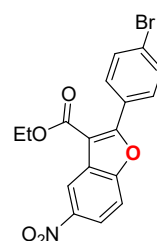

The crude was purified by flash chromatography using Petroleum ether/ Ethyl acetate 20:1 to afford **4n** as white solid (15.2 mg, 39% yield), TLC:  $R_f = 0.26$  (Petroleum ether : Ethyl acetate = 20:1) [UV].  **$^1\text{H NMR}$**  (400 MHz, Chloroform-*d*)  $\delta$  8.98 (s, 1H), 8.31 (d,  $J = 8.8$  Hz, 1H), 7.99 (d,  $J = 8.8$  Hz, 2H), 7.66 (d,  $J = 8.8$  Hz, 2H), 7.63 (d,  $J = 8.8$  Hz, 1H), 4.48 (q,  $J = 7.2$  Hz, 2H), 1.48 (t,  $J = 7.2$  Hz, 3H).  **$^{13}\text{C NMR}$**  (100 MHz, Chloroform-*d*)  $\delta$  162.9, 162.4, 156.3, 145.3, 131.8, 131.2, 127.9, 127.4, 126.1, 121.4, 119.7, 111.8, 110.1, 61.6, 14.4. **HRMS** (ESI-TOF) ( $m/z$ ): Calcd for  $\text{C}_{17}\text{H}_{13}\text{BrNO}_5$  ( $[\text{M} + \text{H}]^+$ ), 389.9972, found, 389.9966.

#### 1-(2-Methyl-5-nitrobenzofuran-3-yl)ethan-1-one (**4o**)

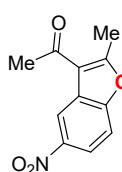

The crude was purified by flash chromatography using Petroleum ether/ Ethyl acetate 50:1 to afford **4o** as white solid (9.9 mg, 45% yield), TLC:  $R_f = 0.26$  (Petroleum ether : Ethyl acetate = 50:1) [UV].  **$^1\text{H NMR}$**  (400 MHz, Chloroform-*d*)  $\delta$  8.92 (s, 1H), 8.25 (d,  $J = 8.8$  Hz, 1H), 7.54 (d,  $J = 8.8$  Hz, 1H), 2.84 (s, 3H), 2.68 (s, 3H).  **$^{13}\text{C NMR}$**  (100 MHz,  $\text{CDCl}_3$ )  $\delta$  193.1, 165.5, 156.3, 145.2, 129.0, 127.0, 120.7, 118.3, 111.5, 31.2, 15.7. **HRMS** (ESI-TOF) ( $m/z$ ): Calcd for  $\text{C}_{11}\text{H}_{10}\text{NO}_4$  ( $[\text{M} + \text{H}]^+$ ), 220.0604, found, 220.0603.

### 1-(2-Ethyl-5-nitrobenzofuran-3-yl)propan-1-one (4p)

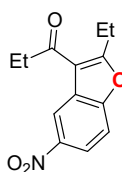

The crude was purified by flash chromatography using Petroleum ether/ Ethyl acetate 50:1 to afford **4p** as white solid (6.9 mg, 28% yield), TLC:  $R_f = 0.26$  (Petroleum ether : Ethyl acetate = 50:1) [UV].  $^1\text{H NMR}$  (400 MHz, Chloroform-*d*)  $\delta$  8.89 (s, 1H), 8.25 (d,  $J = 8.8$  Hz, 1H), 7.55 (d,  $J = 8.8$  Hz, 1H), 3.24 (q,  $J = 7.6$  Hz, 2H), 3.02 (q,  $J = 7.2$  Hz, 2H), 1.41 (t,  $J = 7.6$  Hz, 3H), 1.29 (t,  $J = 7.2$  Hz, 3H).  $^{13}\text{C NMR}$  (100 MHz, Chloroform-*d*)  $\delta$  196.3, 170.2, 156.4, 145.1, 126.8, 120.5, 118.4, 116.8, 111.6, 36.6, 22.8, 12.0, 7.7. **HRMS** (ESI-TOF) ( $m/z$ ): Calcd for  $\text{C}_{13}\text{H}_{14}\text{NO}_4$  ( $[\text{M} + \text{H}]^+$ ), 248.0917, found, 248.0917.

### 8-Nitro-3,4-dihydrodibenzo[b,d]furan-1(2H)-one (4q)<sup>[3]</sup>

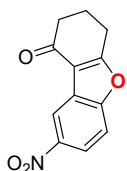

The crude was purified by flash chromatography using Petroleum ether/ Ethyl acetate 10:1 to afford **4q** as white solid (10.6 mg, 46% yield), TLC:  $R_f = 0.26$  (Petroleum ether : Ethyl acetate = 10:1) [UV].  $^1\text{H NMR}$  (600 MHz, Chloroform-*d*)  $\delta$  8.88 (d,  $J = 2.4$  Hz, 1H), 8.26 (dd,  $J = 2.4, 9.0$  Hz, 1H), 7.56 (d,  $J = 9.0$  Hz, 1H), 3.10 (t,  $J = 6.0$  Hz, 2H), 2.65 (t,  $J = 6.0$  Hz, 2H), 2.33 (p,  $J = 6.0$  Hz, 2H).  $^{13}\text{C NMR}$  (100 MHz,  $\text{CDCl}_3$ )  $\delta$  193.9, 173.4, 157.3, 145.8, 124.6, 121.1, 118.3, 117.0, 111.7, 37.8, 24.0, 22.4. **HRMS** (ESI-TOF) ( $m/z$ ): Calcd for  $\text{C}_{12}\text{H}_{10}\text{NO}_4$  ( $[\text{M} + \text{H}]^+$ ), 232.0604, found, 232.0603.

### 3,3-Dimethyl-8-nitro-3,4-dihydrodibenzo[b,d]furan-1(2H)-one (4r)

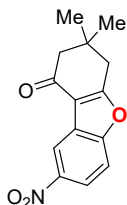

The crude was purified by flash chromatography using Petroleum ether/ Ethyl acetate 30:1 to afford **4r** as white solid (13.5 mg, 52% yield), TLC:  $R_f = 0.26$  (Petroleum ether : Ethyl acetate = 30:1) [UV].  $^1\text{H NMR}$  (400 MHz, Chloroform-*d*)  $\delta$  8.93 (s, 1H), 8.26 (d,  $J = 8.8$  Hz, 1H), 7.57 (d,  $J = 8.8$  Hz, 1H), 2.96 (s, 2H), 2.53 (s, 2H), 1.23 (s, 6H).  $^{13}\text{C NMR}$  (100 MHz,  $\text{CDCl}_3$ )  $\delta$  193.4, 172.6, 157.7, 145.5, 124.5, 121.0, 118.2, 115.8, 111.8, 52.2, 37.9, 35.5, 28.8. **HRMS** (ESI-TOF) ( $m/z$ ): Calcd for  $\text{C}_{14}\text{H}_{14}\text{NO}_4$  ( $[\text{M} + \text{H}]^+$ ), 260.0917, found, 260.0913.

### 2-Nitro-6,7,8,9-tetrahydro-10H-6,9-methanocyclohepta[b]benzofuran-10-one (4s)

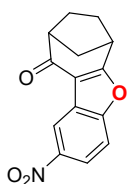

The crude was purified by flash chromatography using Petroleum ether/ Ethyl acetate 10:1 to afford **4s** as white solid (11.7 mg, 46% yield), TLC:  $R_f = 0.16$  (Petroleum ether : Ethyl acetate = 10:1) [UV].  $^1\text{H NMR}$  (400 MHz, Chloroform-*d*)  $\delta$  8.85 (s, 1H), 8.24 (d,  $J = 8.8$  Hz, 1H), 7.58 (d,  $J = 8.8$  Hz, 1H), 3.64 (t,  $J = 4.8$  Hz,

1H), 3.21 – 3.17 (m, 1H), 2.37 – 2.27 (m, 3H), 1.98 – 1.92 (m, 2H), 1.75 – 1.69 (m, 1H). <sup>13</sup>C NMR (100 MHz, Chloroform-*d*) δ 196.8, 179.4, 157.4, 145.4, 124.8, 120.8, 118.0, 114.0, 111.9, 50.3, 41.3, 37.6, 30.1, 25.5. **HRMS** (ESI-TOF) (*m/z*): Calcd for C<sub>14</sub>H<sub>12</sub>NO<sub>4</sub> ([M + H]<sup>+</sup>), 258.0761, found, 258.0765.

#### 2-Nitro-6,7,8,9-tetrahydro-10H-cyclohepta[b]benzofuran-10-one (4t)

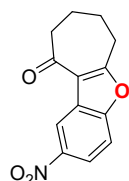

The crude was purified by flash chromatography using Petroleum ether/ Ethyl acetate 20:1 to afford **4t** as white solid (9.8 mg, 40% yield), TLC: R<sub>f</sub> = 0.26 (Petroleum ether : Ethyl acetate = 20:1) [UV]. <sup>1</sup>H NMR (400 MHz, Chloroform-*d*) δ 9.15 (s, 1H), 8.24 (d, *J* = 8.8 Hz, 1H), 7.48 (d, *J* = 8.8 Hz, 1H), 3.25 (t, *J* = 6.0 Hz, 2H), 2.89 (t, *J* = 6.0 Hz, 2H), 2.18 – 2.10 (m, 2H), 2.07 – 2.01 (m, 2H). <sup>13</sup>C NMR (100 MHz, CDCl<sub>3</sub>) δ 196.9, 168.7, 156.8, 145.7, 127.8, 121.0, 119.7, 118.5, 111.0, 45.1, 30.4, 24.6, 22.6. **HRMS** (ESI-TOF) (*m/z*): Calcd for C<sub>13</sub>H<sub>12</sub>NO<sub>4</sub> ([M + H]<sup>+</sup>), 246.0761, found, 246.0762.

#### Ethyl 2-methyl-5-(trifluoromethyl)benzofuran-3-carboxylate (4u)<sup>[2]</sup>

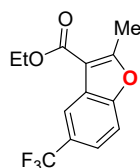

The crude was purified by flash chromatography using Petroleum ether/ Ethyl acetate 50:1 to afford **4u** as white solid (12.3 mg, 42% yield), TLC: R<sub>f</sub> = 0.26 (Petroleum ether : Ethyl acetate = 50:1) [UV]. <sup>1</sup>H NMR (400 MHz, Chloroform-*d*) δ 8.25 (s, 1H), 7.57 – 7.48 (m, 2H), 4.44 (q, *J* = 7.2 Hz, 2H), 2.80 (s, 3H), 1.46 (t, *J* = 7.2 Hz, 3H). <sup>13</sup>C NMR (100 MHz, Chloroform-*d*) δ 165.4, 164.0, 155.0, 126.6 126.5 (d, *J* = 32.0 Hz), 126.1 (d, *J* = 8.0 Hz), 123.3, 120.7 (dm, *J* = 195.0 Hz), 111.3, 109.5, 60.8, 14.6, 14.5. <sup>19</sup>F NMR (376 MHz, Chloroform-*d*) δ -61.01 (s, 3F). **HRMS** (ESI-TOF) (*m/z*): Calcd for C<sub>13</sub>H<sub>10</sub>F<sub>3</sub>O<sub>3</sub> ([M - H]<sup>-</sup>), 271.0588, found, 271.0588.

#### Ethyl 5-cyano-2-methylbenzofuran-3-carboxylate (4v)

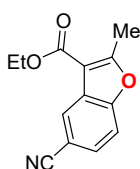

The crude was purified by flash chromatography using Petroleum ether/ Ethyl acetate 30:1 to afford **4v** as white solid (9.2 mg, 36% yield), TLC: R<sub>f</sub> = 0.25 (Petroleum ether : Ethyl acetate = 30:1) [UV]. <sup>1</sup>H NMR (400 MHz, Chloroform-*d*) δ 8.29 (s, 1H), 7.57 (d, *J* = 8.8 Hz, 1H), 7.51 (d, *J* = 8.8 Hz, 1H), 4.44 (q, *J* = 7.2 Hz, 2H), 2.81 (s, 3H), 1.46 (t, *J* = 7.2 Hz, 3H). <sup>13</sup>C NMR (100 MHz, CDCl<sub>3</sub>) δ 165.9, 163.6, 155.3, 128.3, 127.0, 122.9, 119.5, 115.1, 112.1, 107.9, 61.0, 14.8, 14.6. **HRMS** (ESI-TOF) (*m/z*): Calcd for C<sub>13</sub>H<sub>12</sub>NO<sub>3</sub> ([M + H]<sup>+</sup>), 230.0812, found, 230.0812.



### 3-Ethyl 5-methyl 2-methylbenzofuran-3,6-dicarboxylate (**4w**)<sup>[2]</sup>

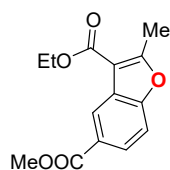

The crude was purified by flash chromatography using Petroleum ether/ Ethyl acetate 50:1 to afford **4w** as white solid (10.5 mg, 38% yield), TLC:  $R_f = 0.24$  (Petroleum ether : Ethyl acetate = 50:1) [UV]. **<sup>1</sup>H NMR** (400 MHz, Chloroform-*d*)  $\delta$  8.66 (s, 1H), 8.02 (d,  $J = 8.8$  Hz, 1H), 7.45 (d,  $J = 8.8$  Hz, 1H), 4.44 (q,  $J = 7.2$  Hz, 2H), 3.95 (s, 3H), 2.79 (s, 3H), 1.46 (t,  $J = 7.2$  Hz, 3H). **<sup>13</sup>C NMR** (100 MHz, CDCl<sub>3</sub>)  $\delta$  167.4, 165.0, 164.1, 156.2, 126.5, 126.34, 126.26, 124.3, 110.8, 109.7, 60.7, 52.3, 14.60, 14.56. **HRMS** (ESI-TOF) (m/z): Calcd for C<sub>14</sub>H<sub>15</sub>O<sub>5</sub> ([M + H]<sup>+</sup>), 263.0914, found, 263.0911.

### Ethyl 6-amino-2-methylbenzofuran-3-carboxylate (**15**)

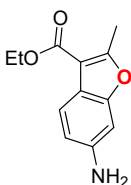

The crude was purified by flash chromatography using Petroleum ether/ Ethyl acetate 10:1 to afford **15** as brown solid (179.6 mg, 82% yield), TLC:  $R_f = 0.20$  (Petroleum ether : Ethyl acetate = 10:1) [UV]. **<sup>1</sup>H NMR** (400 MHz, Chloroform-*d*)  $\delta$  7.68 (d,  $J = 8.4$  Hz, 1H), 6.73 (s, 1H), 6.67 (d,  $J = 8.4$  Hz, 1H), 4.38 (q,  $J = 7.2$  Hz, 2H), 3.74 (s, 2H), 2.70 (s, 3H), 1.42 (t,  $J = 7.2$  Hz, 3H). **<sup>13</sup>C NMR** (100 MHz, CDCl<sub>3</sub>)  $\delta$  164.9, 161.7, 155.1, 144.4, 122.2, 118.2, 112.9, 109.1, 97.2, 60.2, 14.6, 14.4. **HRMS** (ESI-TOF) (m/z): Calcd for C<sub>12</sub>H<sub>14</sub>NO<sub>3</sub> ([M + H]<sup>+</sup>), 220.0968, found, 220.0965.

### Ethyl 6-iodo-2-methylbenzofuran-3-carboxylate (**16**)

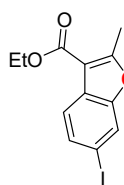

The crude was purified by flash chromatography using Petroleum ether/ Ethyl acetate 10:1 to afford **16** as brown solid (49.5 mg, 75% yield), TLC:  $R_f = 0.26$  (Petroleum ether : Ethyl acetate = 10:1) [UV]. **<sup>1</sup>H NMR** (600 MHz, Chloroform-*d*)  $\delta$  7.78 (s, 1H), 7.69 (d,  $J = 8.4$  Hz, 1H), 7.56 (d,  $J = 8.4$  Hz, 1H), 4.40 (q,  $J = 7.2$  Hz, 2H), 2.75 (s, 3H), 1.43 (t,  $J = 7.2$  Hz, 3H). **<sup>13</sup>C NMR** (150 MHz, CDCl<sub>3</sub>)  $\delta$  164.2, 164.0, 154.1, 133.0, 126.2, 123.4, 120.2, 109.3, 87.8, 60.6, 14.54, 14.51. **HRMS** (ESI-TOF) (m/z): Calcd for C<sub>12</sub>H<sub>10</sub>IO<sub>3</sub> ([M - H]<sup>-</sup>), 328.9680, found, 328.9669.

### (2-Methyl-6-nitrobenzofuran-3-yl)methanol (**17**)

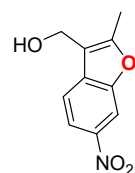

The crude was purified by flash chromatography using Petroleum ether/ Ethyl acetate 4:1 to afford **17** as colorless solid (75.6 mg, 73% yield), TLC:  $R_f = 0.26$  (Petroleum ether : Ethyl acetate = 4:1) [UV]. **<sup>1</sup>H NMR** (400 MHz, Chloroform-*d*)  $\delta$  8.28 (s, 1H), 8.15 (d,  $J = 8.8$  Hz, 1H), 7.68 (d,  $J = 8.8$  Hz, 1H), 4.81 (d,  $J = 4.0$  Hz,



2H), 2.54 (s, 3H), 1.73 (s, 1H).  $^{13}\text{C NMR}$  (100 MHz, Chloroform-*d*)  $\delta$  158.9, 152.8, 144.7, 134.8, 119.2, 118.7, 115.2, 107.3, 55.3, 12.7. **HRMS** (ESI-TOF) (*m/z*): Calcd for  $\text{C}_{10}\text{H}_8\text{NO}_4$  ( $[\text{M} - \text{H}]^-$ ), 206.0459, found, 206.0452.

**(6-Amino-2-methylbenzofuran-3-yl)methanol (18)**

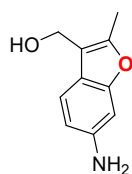

The crude was purified by flash chromatography using Petroleum ether/ Ethyl acetate 2:1 to afford **18** as brown solid (25.2 mg, 71% yield), TLC:  $R_f = 0.26$  (Petroleum ether : Ethyl acetate = 2:1) [UV].  $^1\text{H NMR}$  (400 MHz, DMSO-*d*<sub>6</sub>)  $\delta$  7.20 (d,  $J = 8.4$  Hz, 1H), 6.59 (s, 1H), 6.49 (d,  $J = 8.4$  Hz, 1H), 5.01 (s, 2H), 4.81 (t,  $J = 5.2$  Hz, 1H), 4.45 (d,  $J = 5.2$  Hz, 2H), 2.31 (s, 3H).  $^{13}\text{C NMR}$  (100 MHz, DMSO-*d*<sub>6</sub>)  $\delta$  154.9, 147.8, 145.9, 119., 118.5, 114.9, 110.7, 95.3, 53.6, 11.7. **HRMS** (ESI-TOF) (*m/z*): Calcd for  $\text{C}_{10}\text{H}_{12}\text{NO}_2$  ( $[\text{M} + \text{H}]^+$ ), 178.0863, found, 178.0860.

## 4. Mechanistic investigation

### 4.1 Trapping experiment

In order to explore whether the transformation proceeds *via* the radical pathway, a series of reactions were carried out in the presence of the trapping reagents TEMPO and DPE. Under the standard conditions, two equivalents of radical scavengers (TEMPO, DPE) were added to the reaction. The standard product **3a** was obtained in yields of 76% and 78%. No significant decrease of yield was observed. Hence, it can be inferred that the reaction does not proceed *via* a radical pathway.

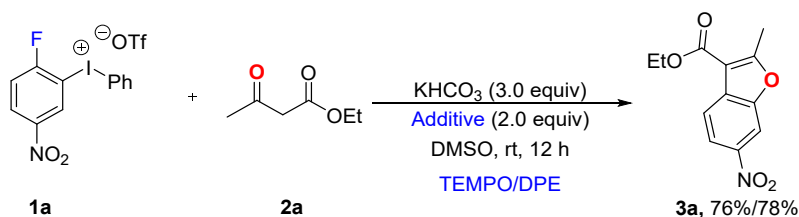

### 4.2 Controlled experiments

To clarify the sequence of two consecutive nucleophilic substitutions during the cycloaddition reaction of the diaryliodonium salt, several controlled experiments were performed. When fluoroaromatic **1d** was subjected to the reaction conditions, no cycloaddition product **5** or any other substituted products were observed. In contrast, compound **1e**, containing a para-positioned nitro group—a strong electron-withdrawing group—underwent a reaction with **2a**, resulting in the formation of *C*-arylated products **6** and **7**. This observation suggests that electron-withdrawing groups can facilitate the initial nucleophilic substitution. These experimental results are aligning with findings from previous studies [1], [4-6].

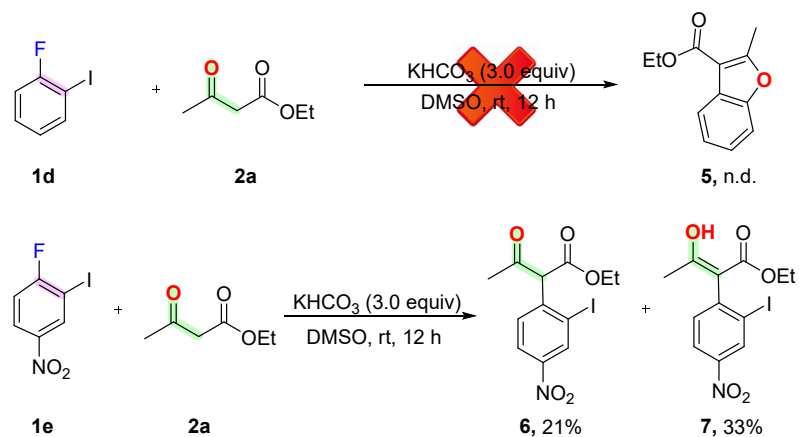

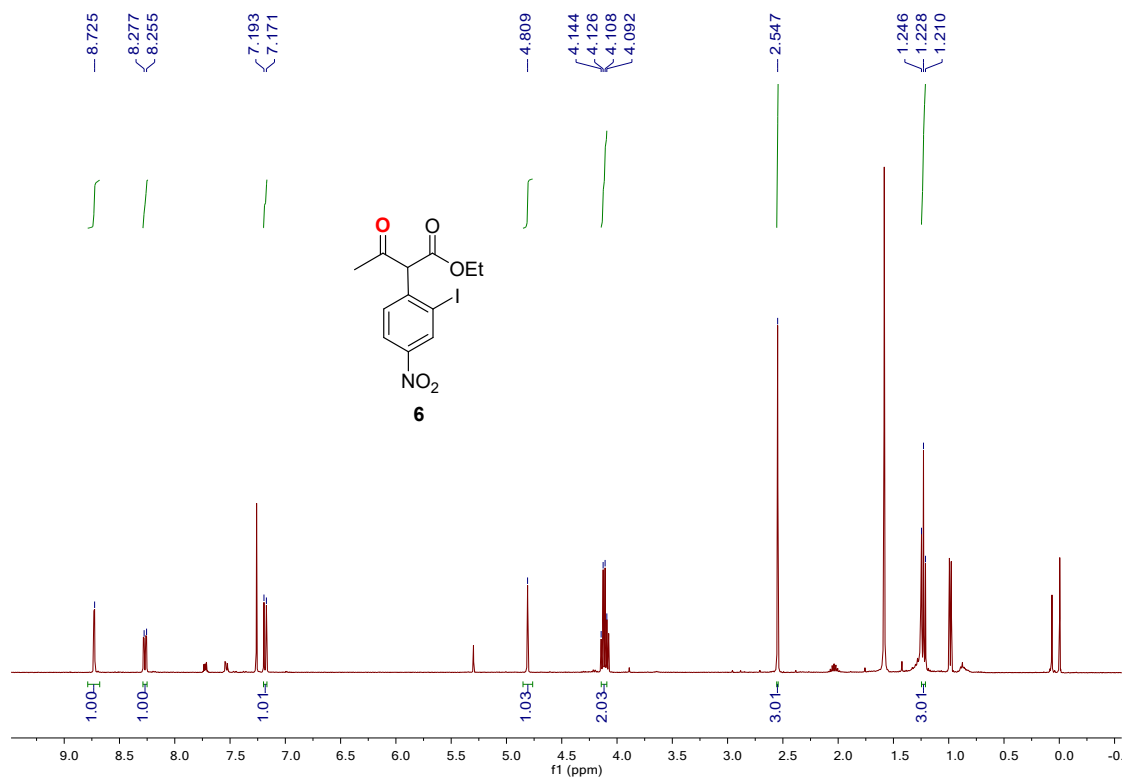

Fig. S1  $^1\text{H}$  NMR data of 6

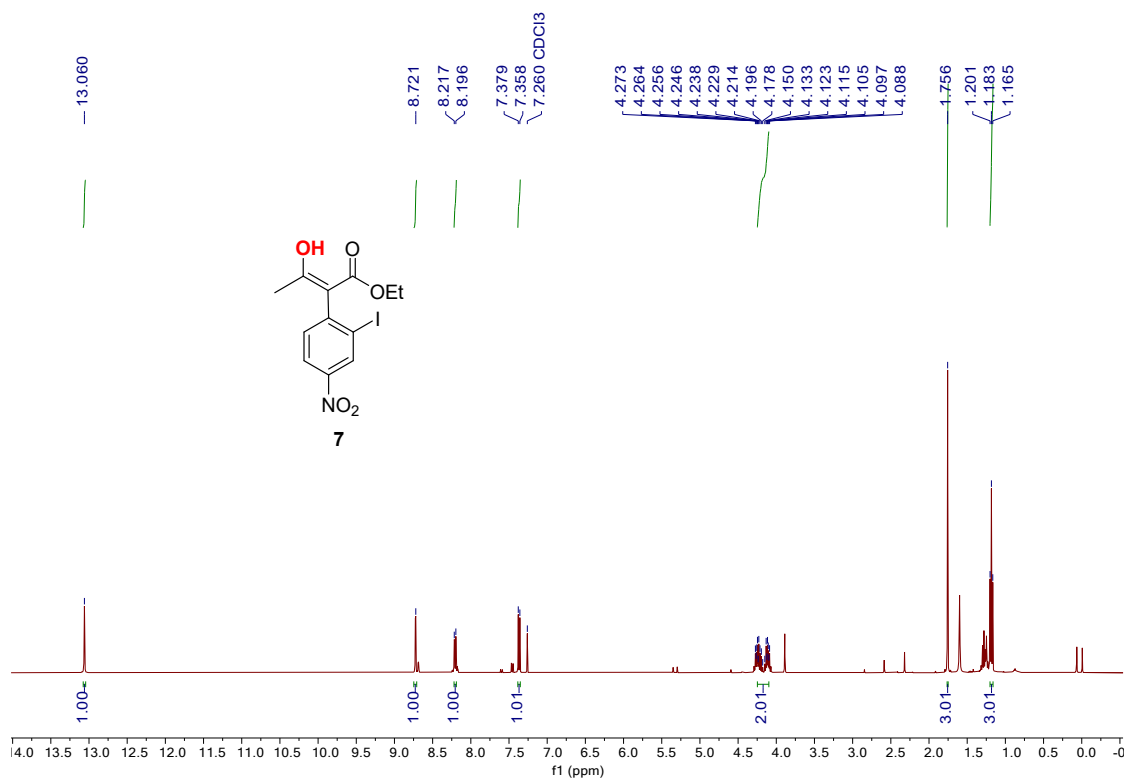

Fig. S2  $^1\text{H}$  NMR data of 7

Further, in order to prove whether the *O*-arylation reaction of diaryliodonium salt with ethyl acetoacetate is the first step of cyclization reaction. Diaryliodonium salt **1f**, lacking the nitro substitution, was used, no *O*-arylation product **8** and other useful products were detected under standard conditions. This indicates that *O*-arylation is unlikely to be the first step in the cyclization process.

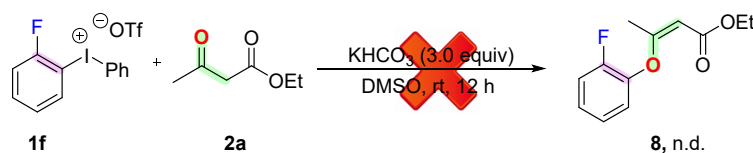

Meanwhile, control experiments analogous to those with fluoroaryl derivatives were conducted using 1-bromo-2-iodo-4-nitrobenzene (**1g**) and (2-bromophenyl)(phenyl)iodonium trifluoromethanesulfonate (**1h**). Interestingly, when 1-bromo-2-iodo-4-nitrobenzene (**1g**) was used, no *O*-arylation product (**9**) was detected under standard conditions.<sup>11</sup> In contrast, when diaryliodonium salt **1h** was employed, *C*-arylated products **10** and **11** were observed. These findings suggest that the initial step in the formation of the cyclized product **4** involves an enolate attack on the carbon atom bonded to the iodine atom of the iodonium salt.

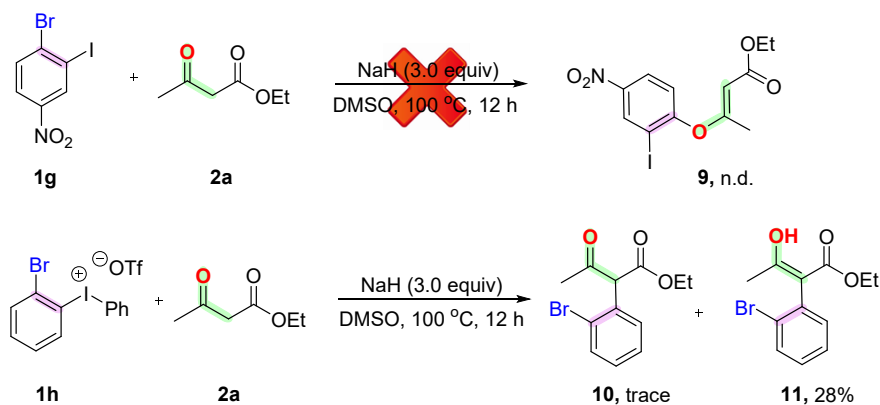

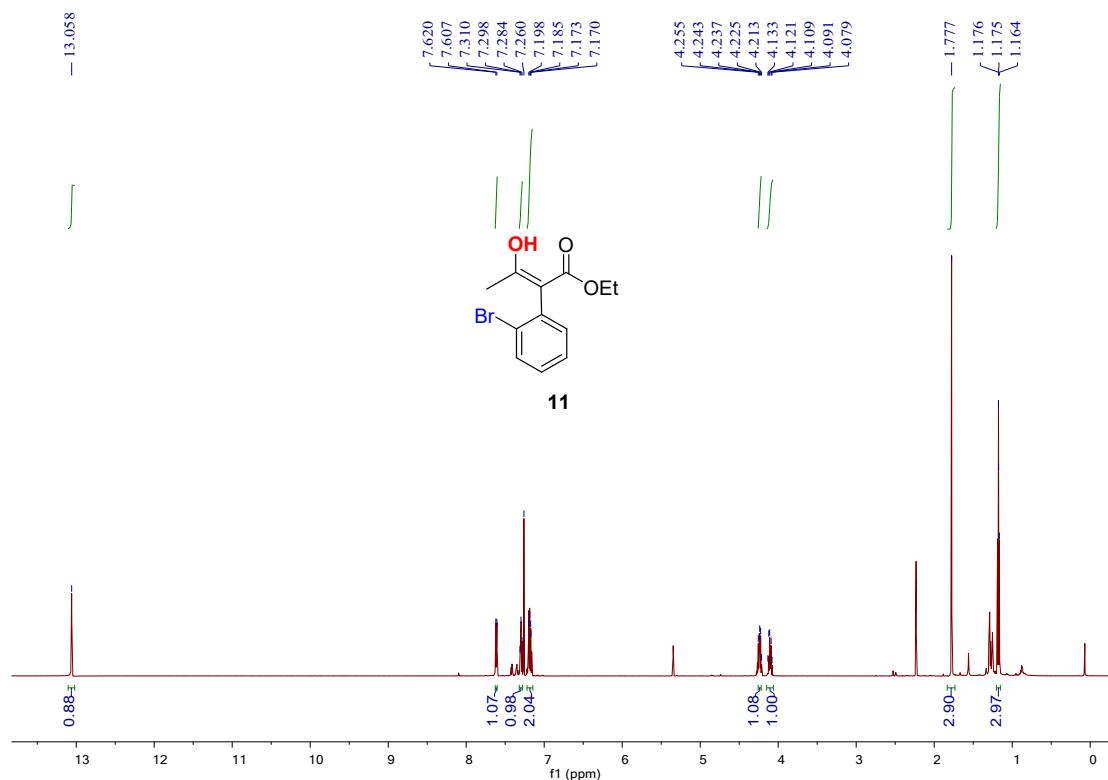

Fig. S3 <sup>1</sup>H NMR data of **11**

Finally, in order to verify whether aryne intermediate is involved in the cyclization reaction, we directly utilized the aryne generated from 2-(trimethylsilyl)phenyl trifluoromethanesulfonate **12** in the presence of CsF to conduct a cycloaddition reaction with ethyl acetoacetate **2a**. It is worth noting that acyl-alkylated product **14** was finally obtained in good yield [7], and no cycloaddition products were detected. These findings suggest that the aryne intermediate may not be involved in the reaction process.

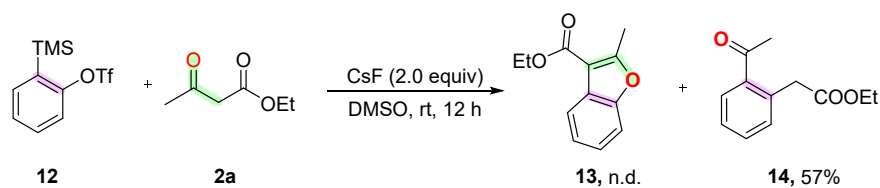

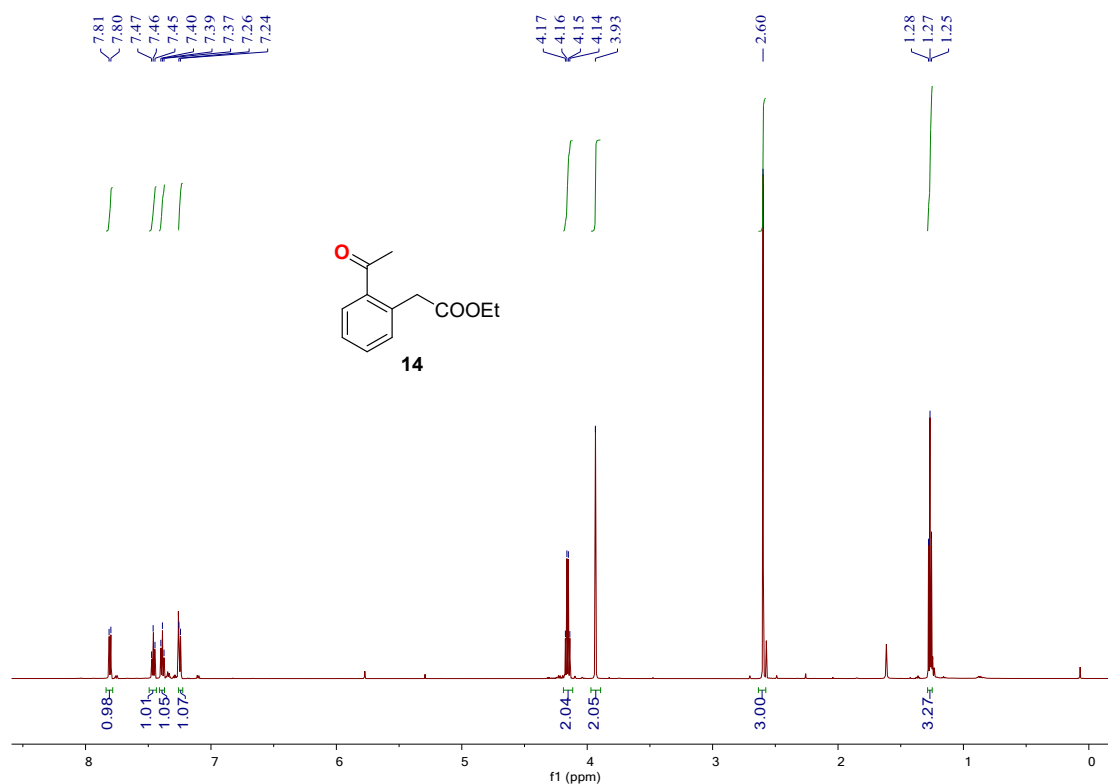

Fig. S4  $^1\text{H}$  NMR data of **14**

Overall, these control experiments indicate the importance of electron-withdrawing groups in the iodized salt, which play a crucial role in promoting the reaction. The observed difference in regioselectivity resulting from the use of diaryliodonium salts substituted with various halogens may be attributed to the leaving ability of the halogen atom and the electrophilicity of the C-X bond.

## 5. References

- [1] E. Linde, D. Bulfield, G. Kervefors, N. Purkait, B. Olofsson, *Chem.* 2022, **8**, 850.
- [2] B. Lu, B. Wang, Y. Zhang, D. Ma, *J. Org. Chem.* 2007, **72**, 5337.
- [3] X. Li, Y. Shen, G. Zhang, X. Zheng, Q. Zhao, Z. Song, *Org. Lett.* 2022, **24**, 5281.
- [4] S. Mondal, E. M. Di Tommaso, B. Olofsson, *Angew. Chem. Int. Ed.* 2023, **62**, e202216296.
- [5] E. Linde, B. Olofsson, *Angew. Chem. Int., Ed.* 2023, **62**, e202310921.
- [6] S. Mondal, B. Gunschera, B. Olofsson, *JACS Au.* 2024, **4**, 2832.
- [7] S. Kovacs, A. I. Csicsi, T. Z. Nagy, S. Boros, G. Tim'ari and Z. Novak, *Org. Lett.* 2012, **14**, 2022.

## 6. $^1\text{H}$ , $^{13}\text{C}$ , $^{19}\text{F}$ Spectra of New Compounds

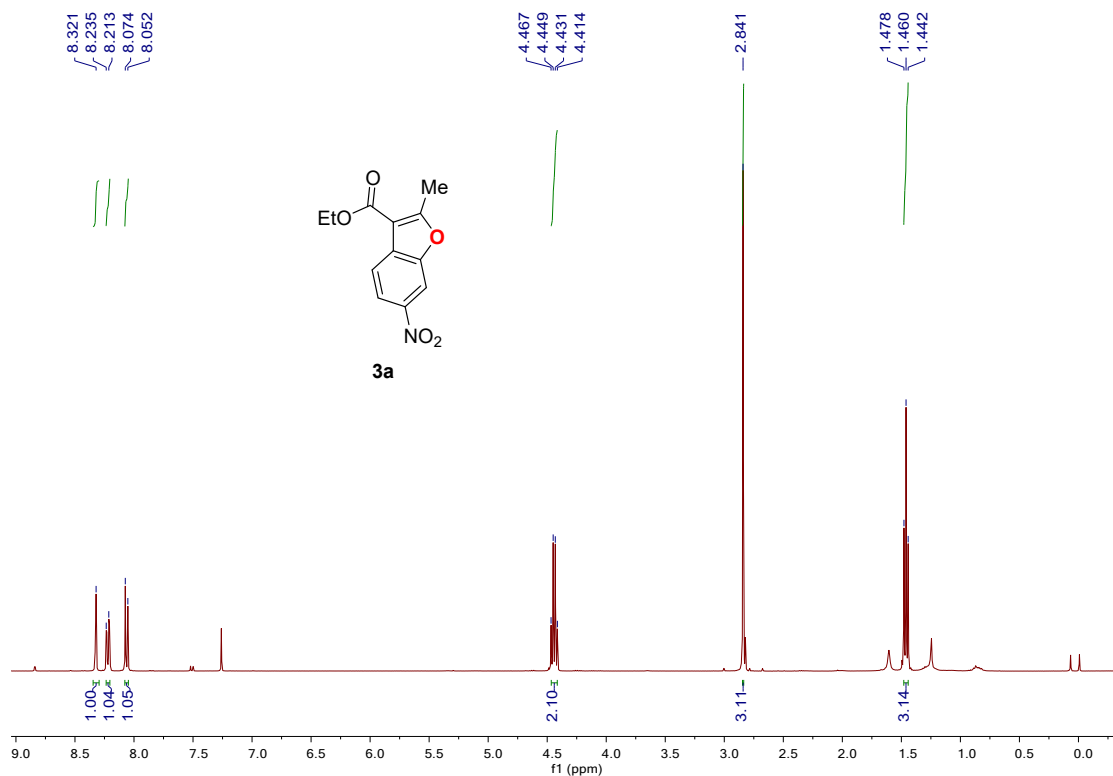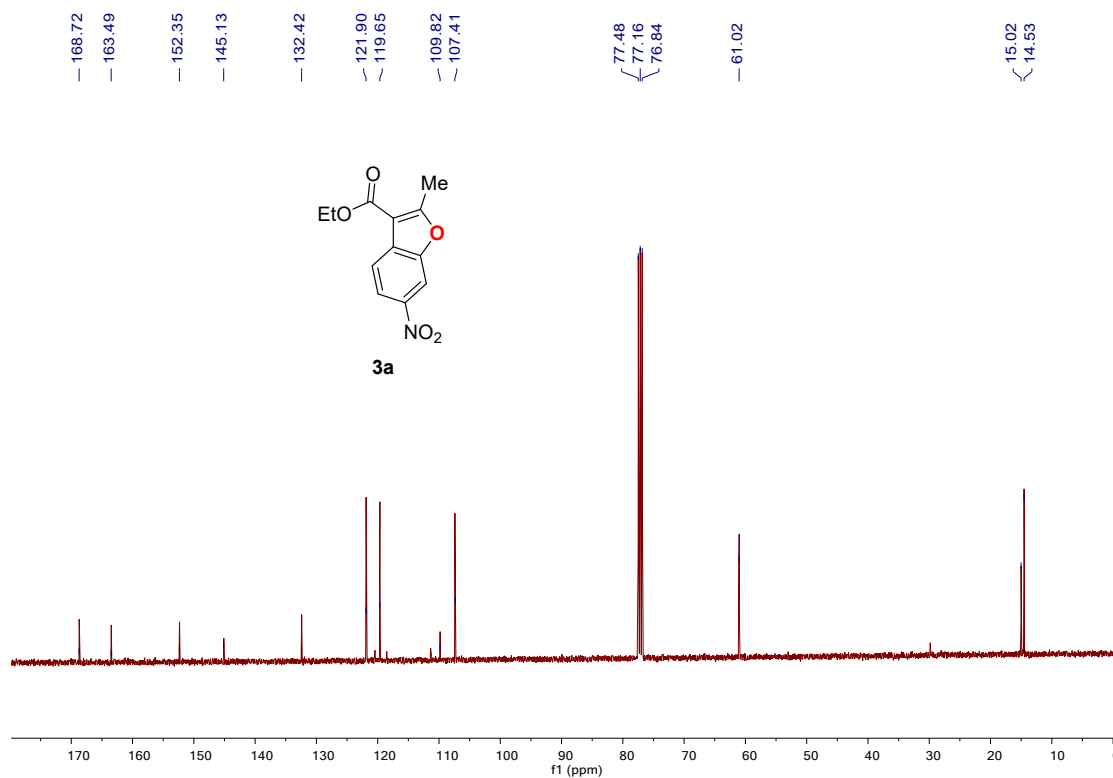



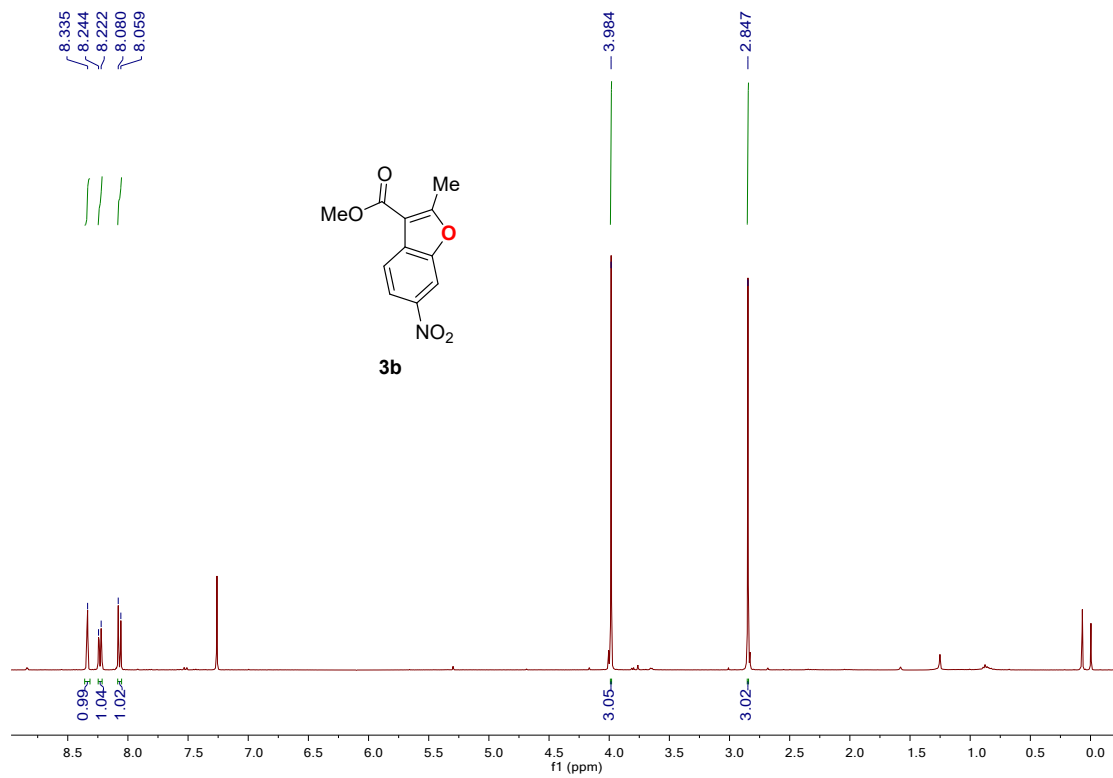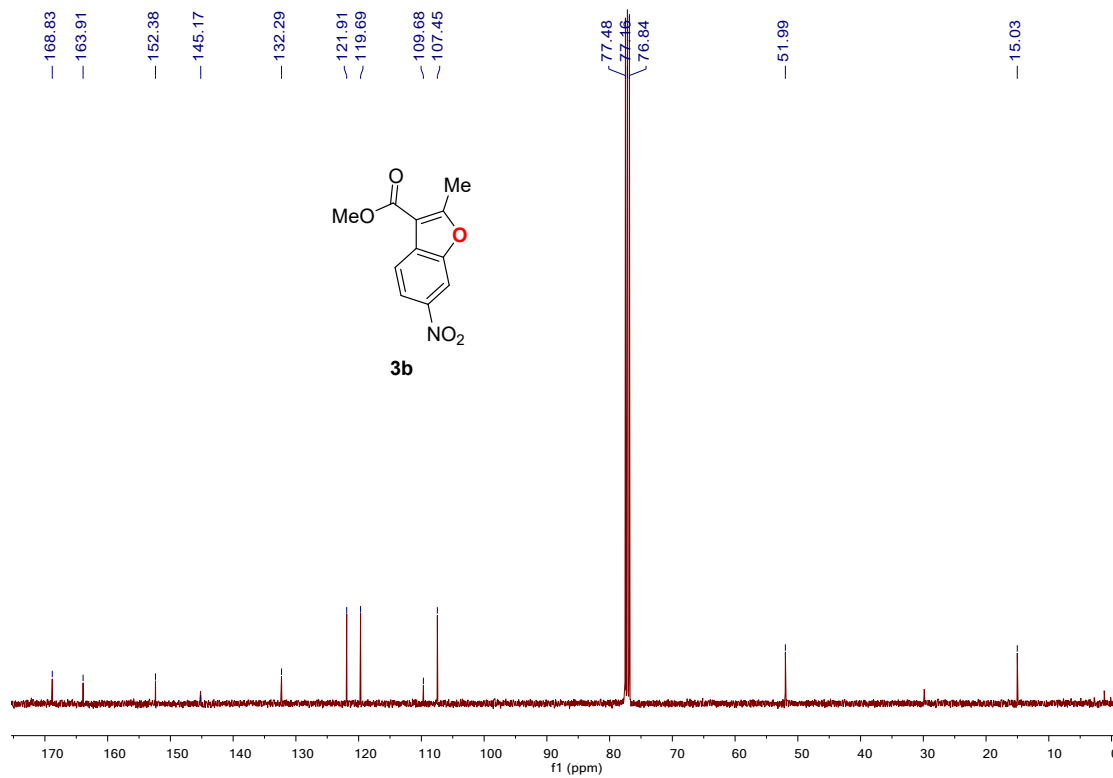

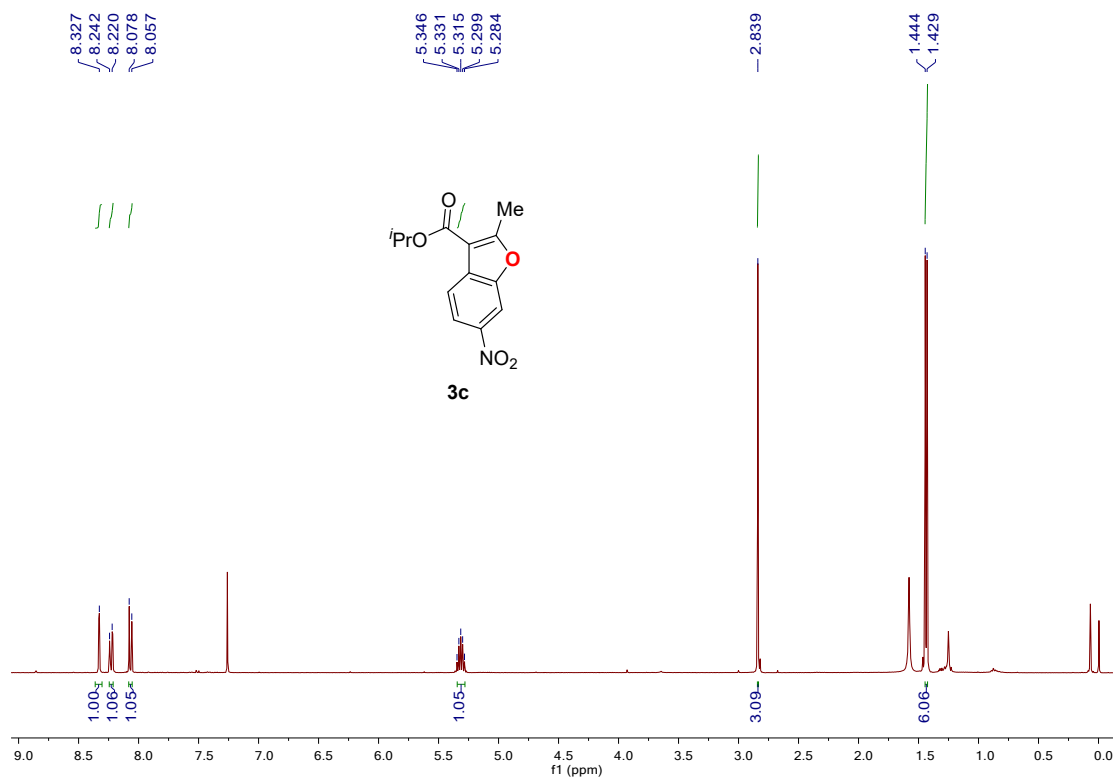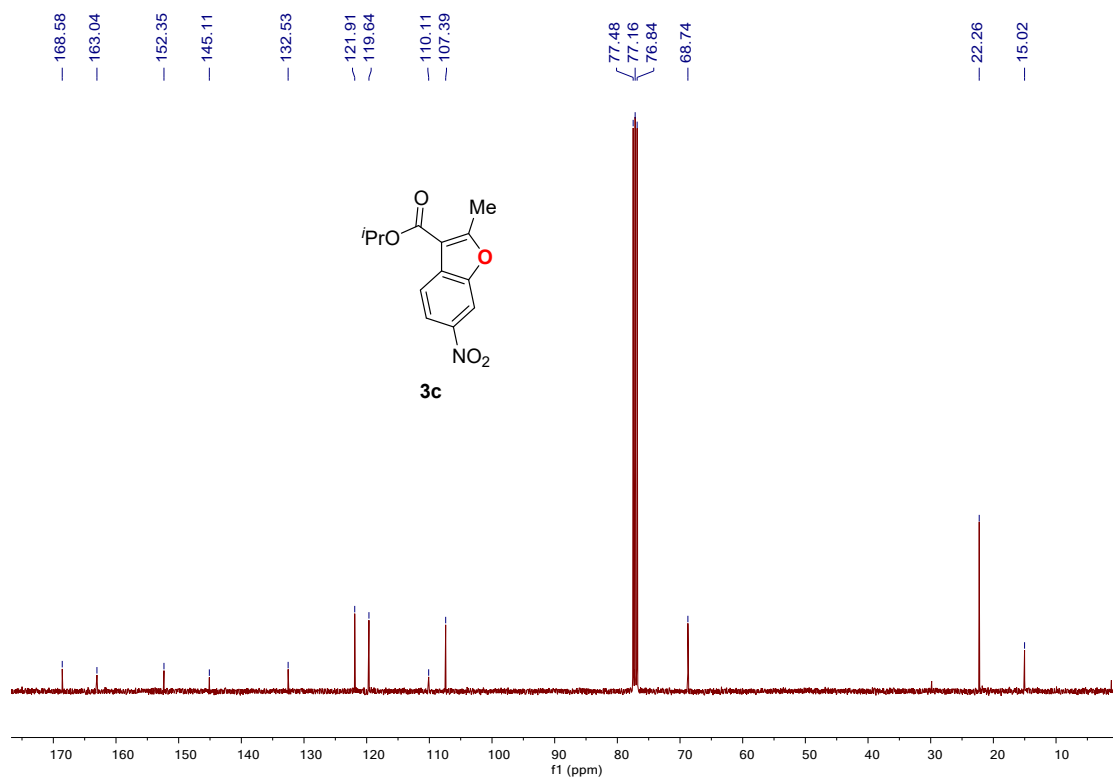

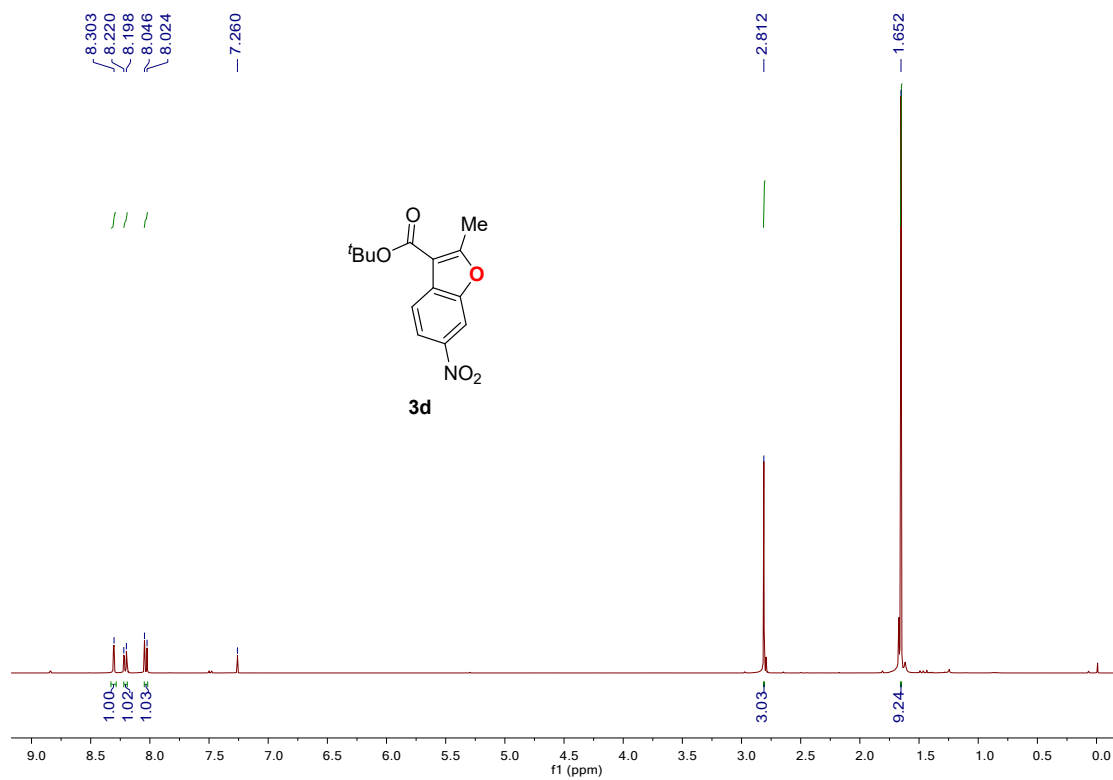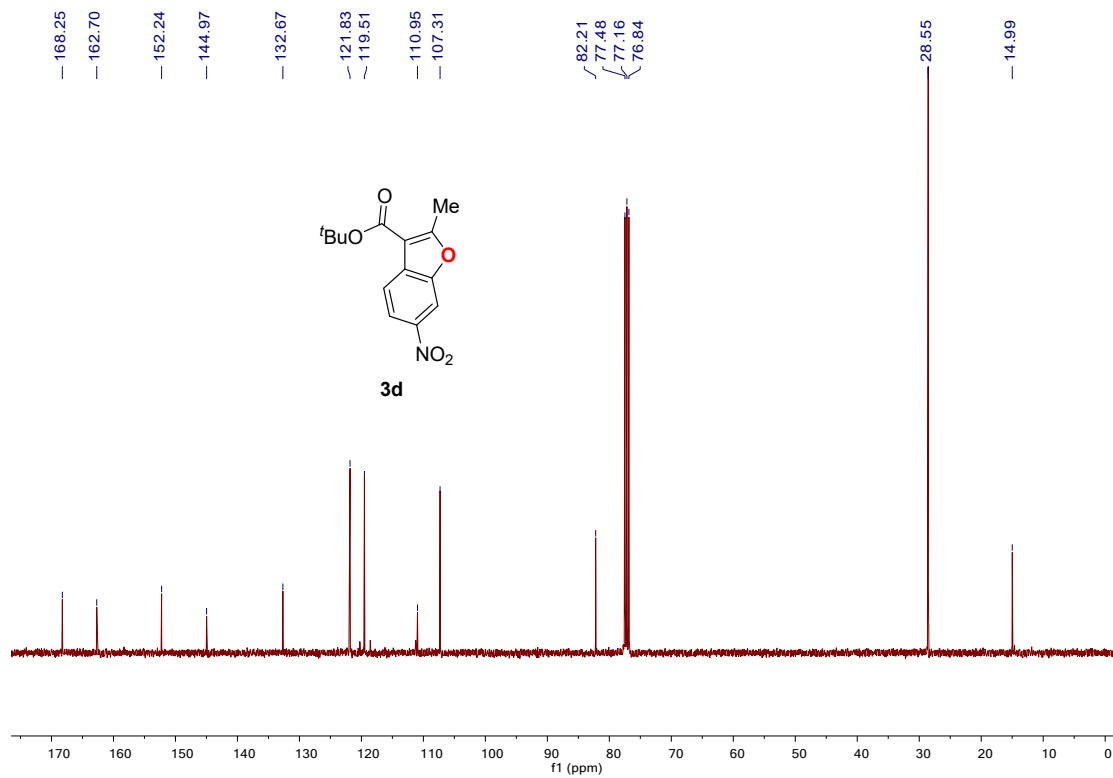

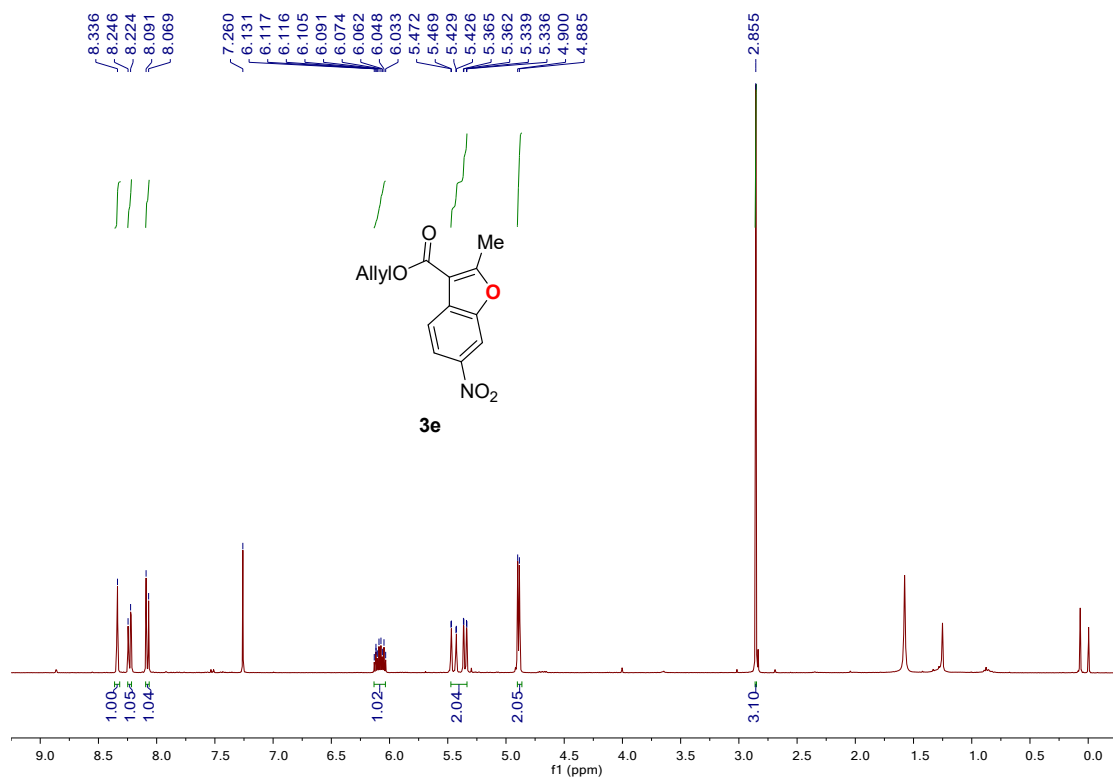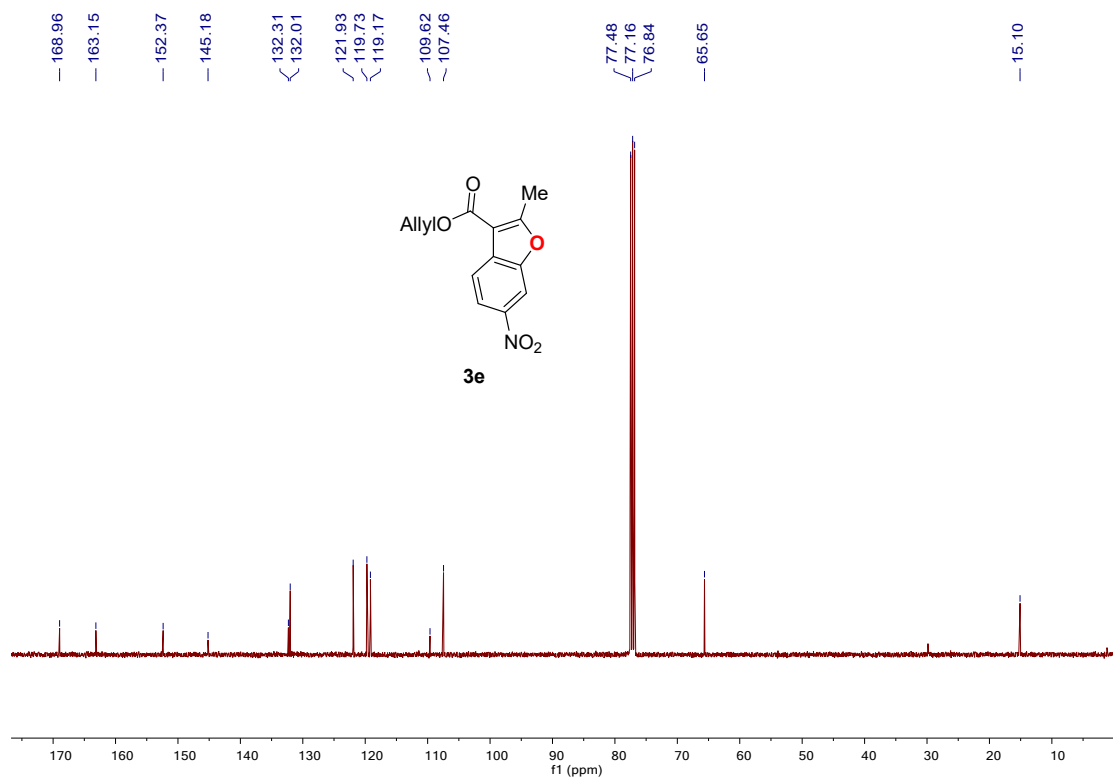

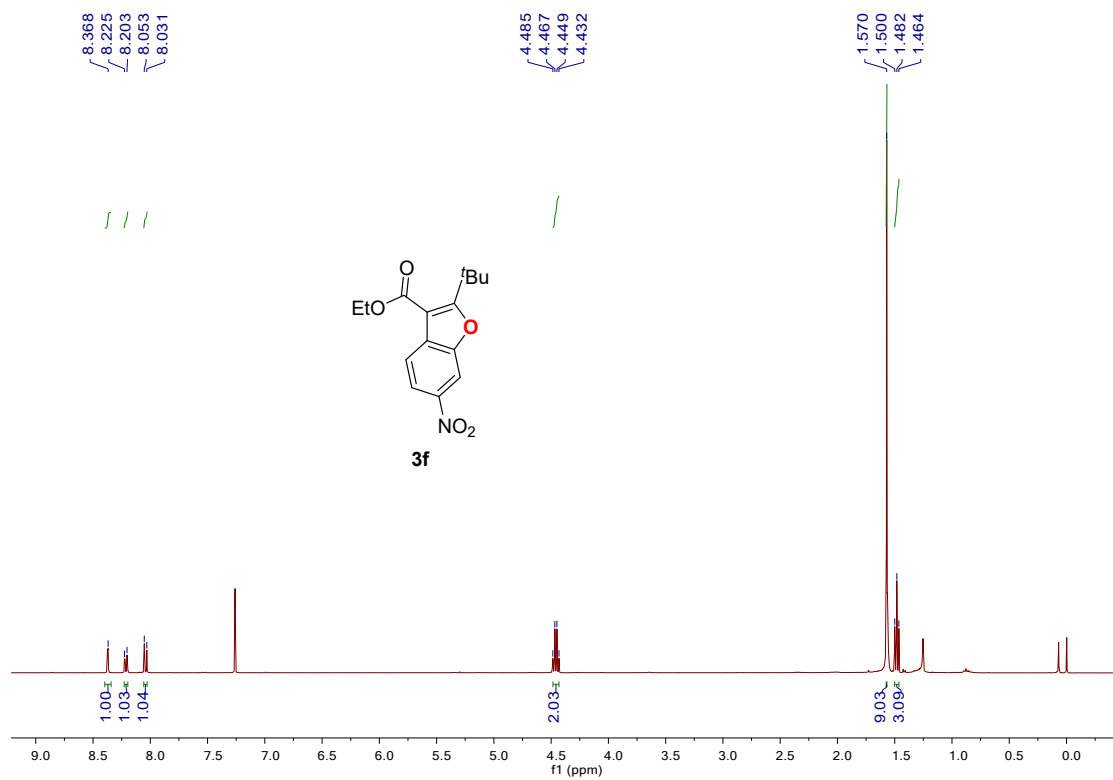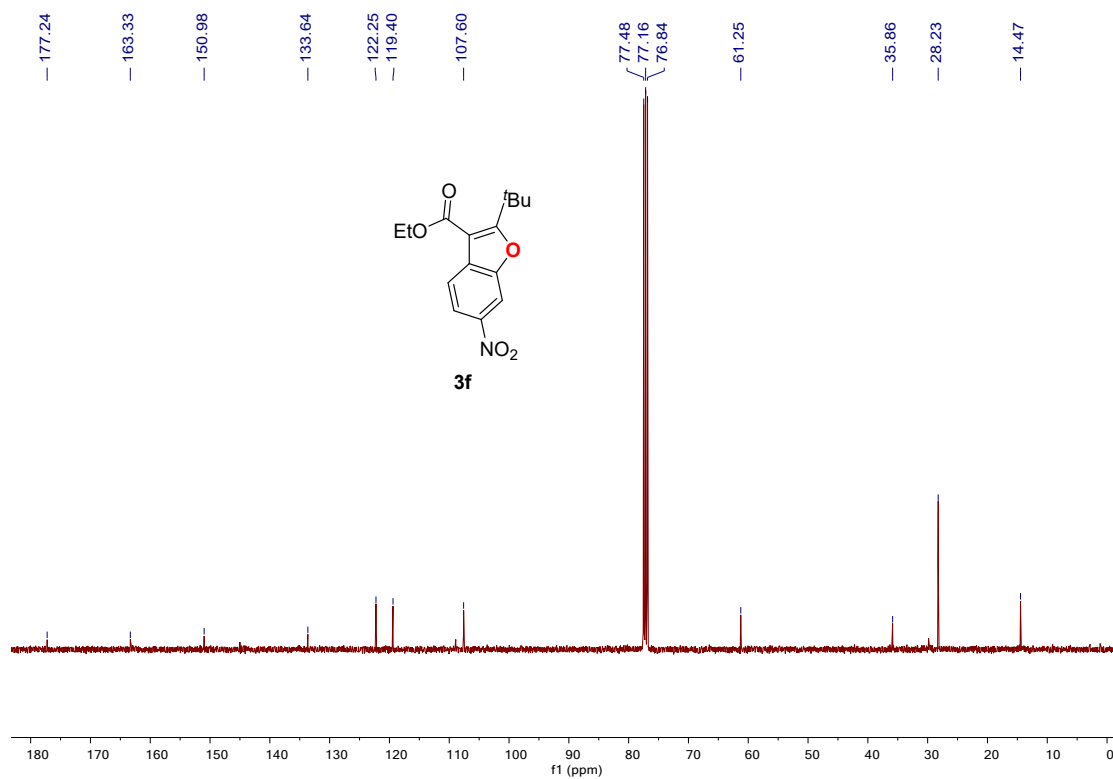

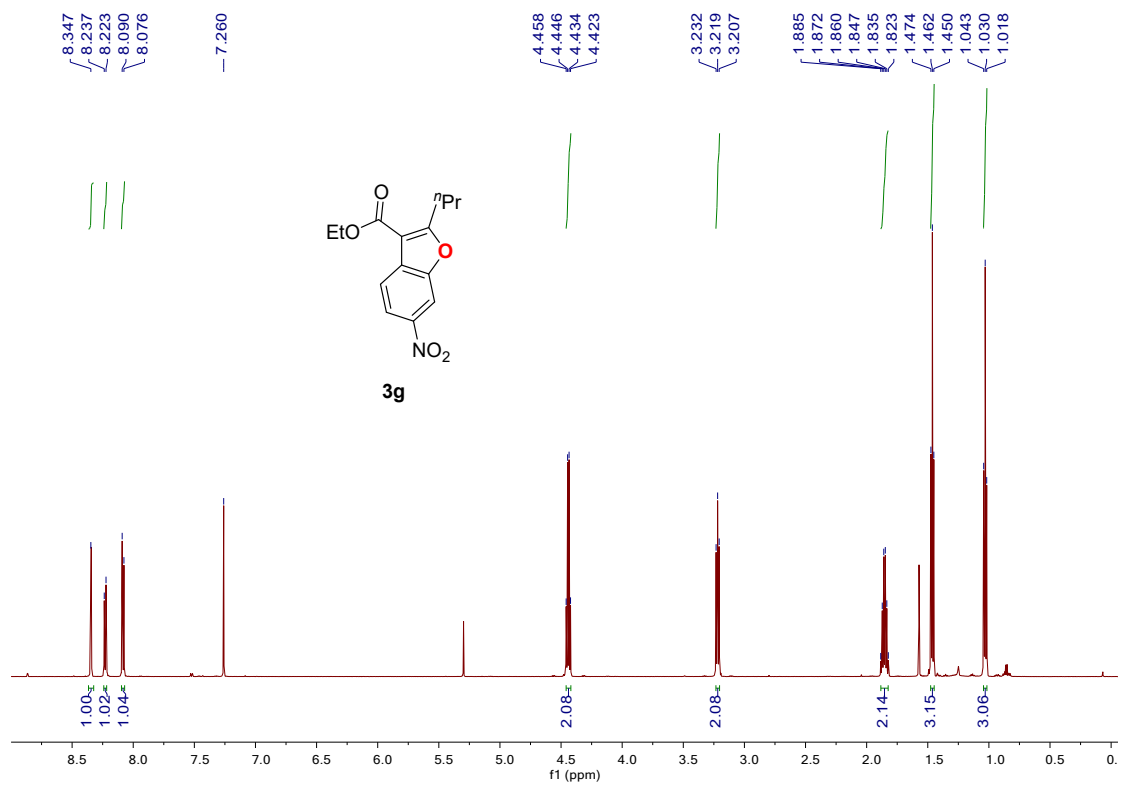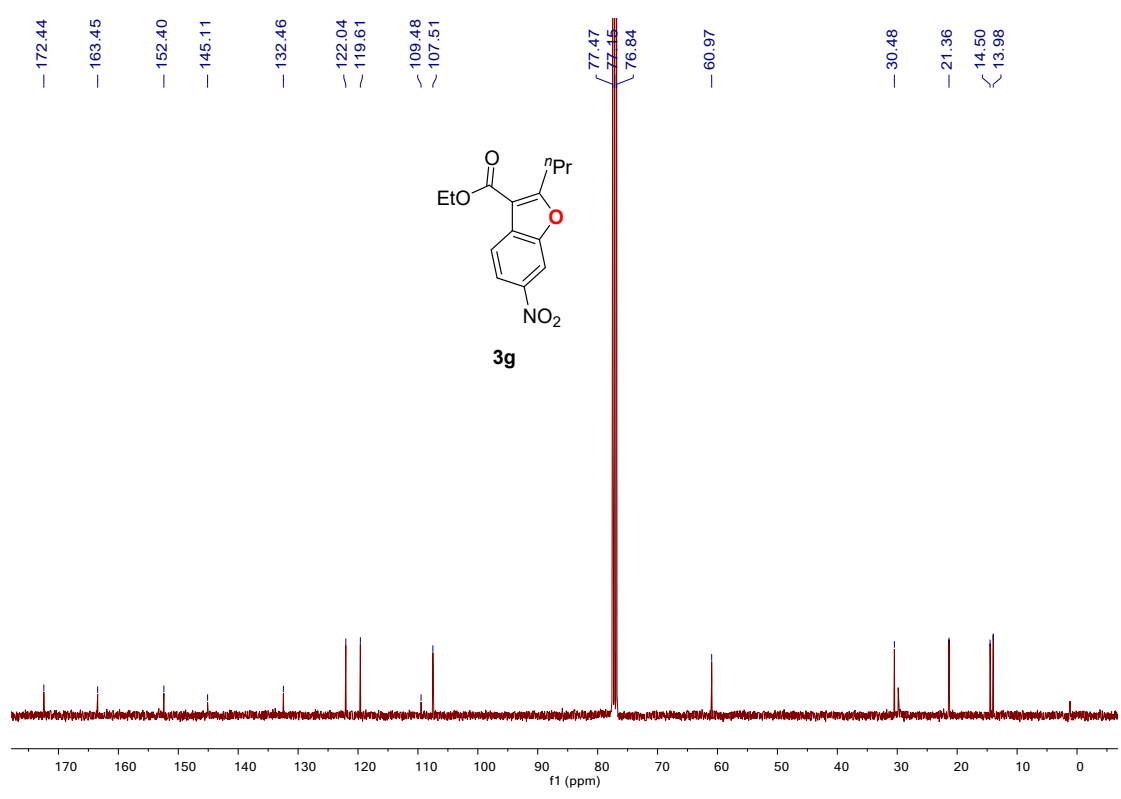

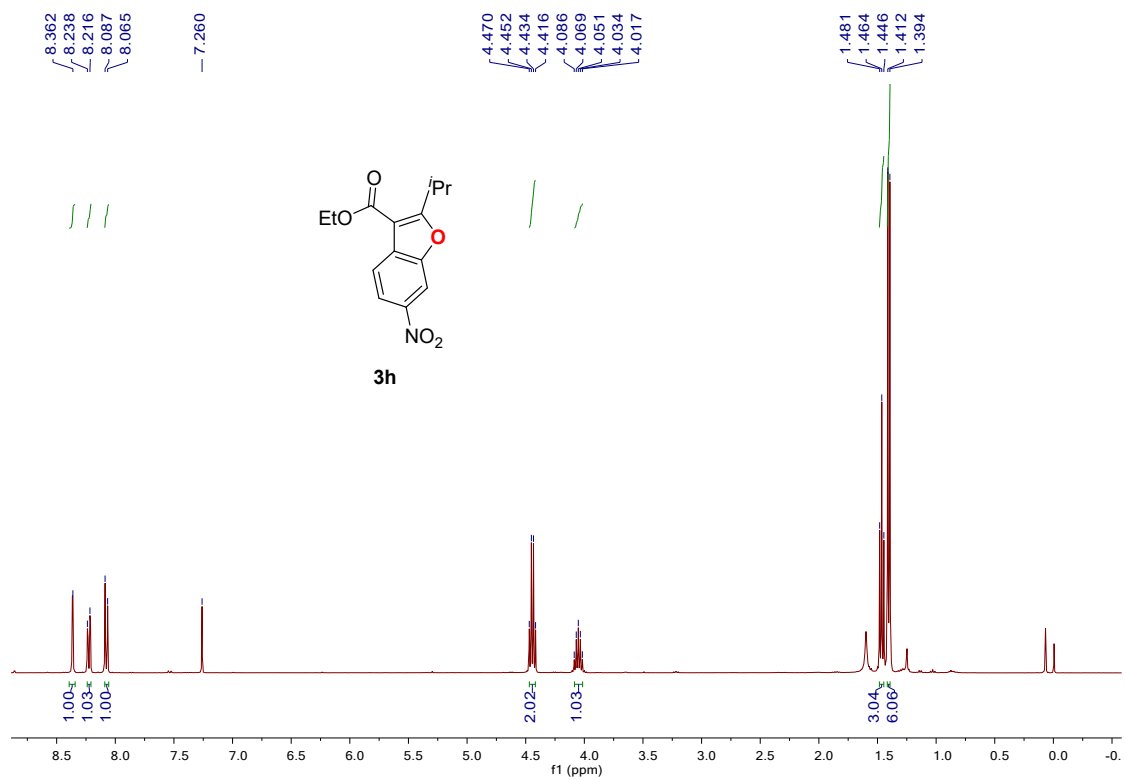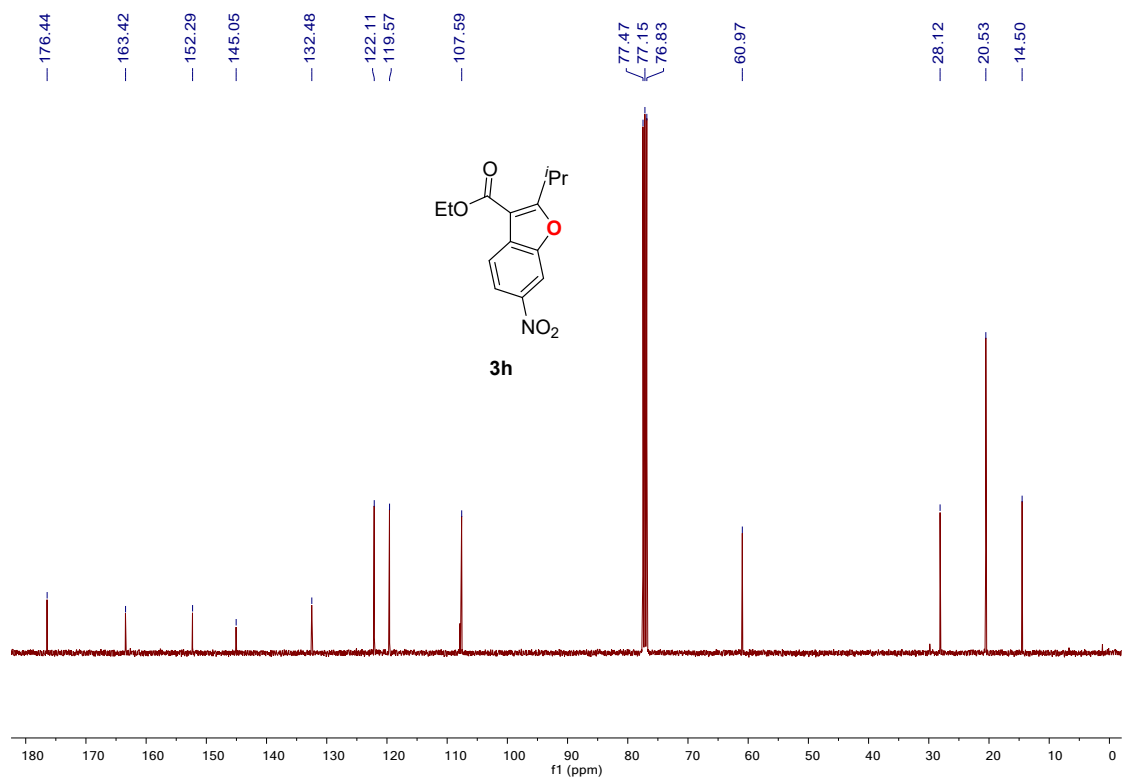

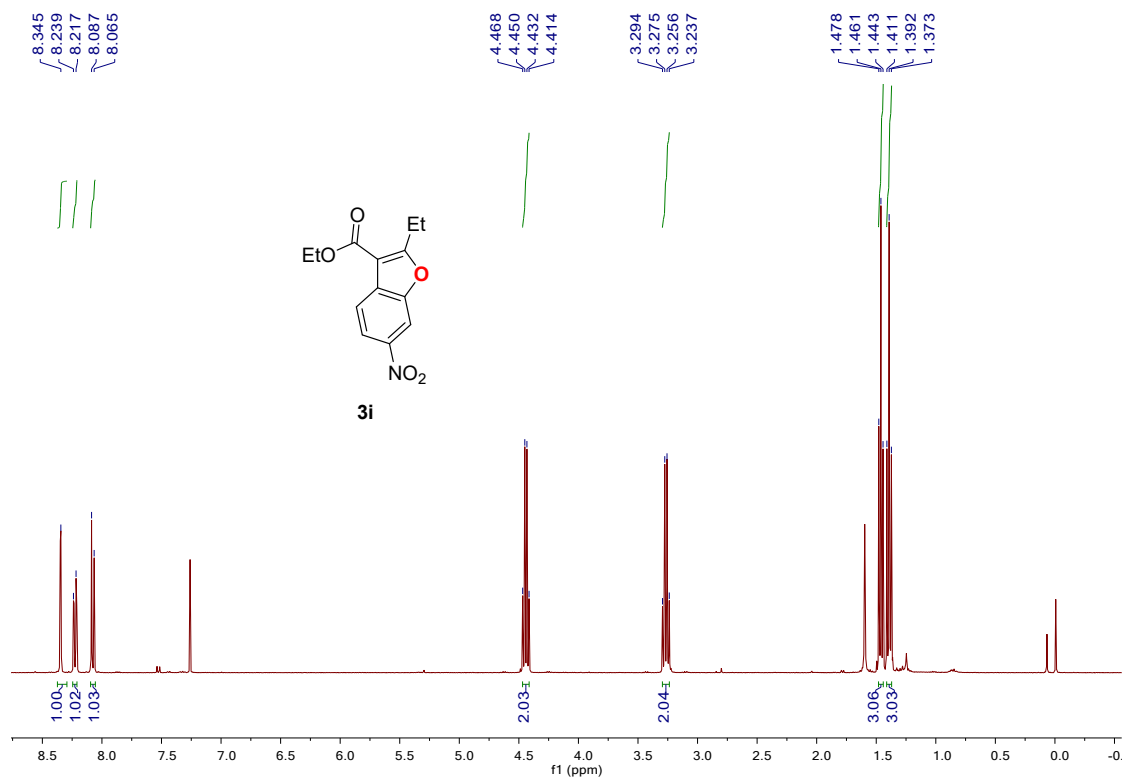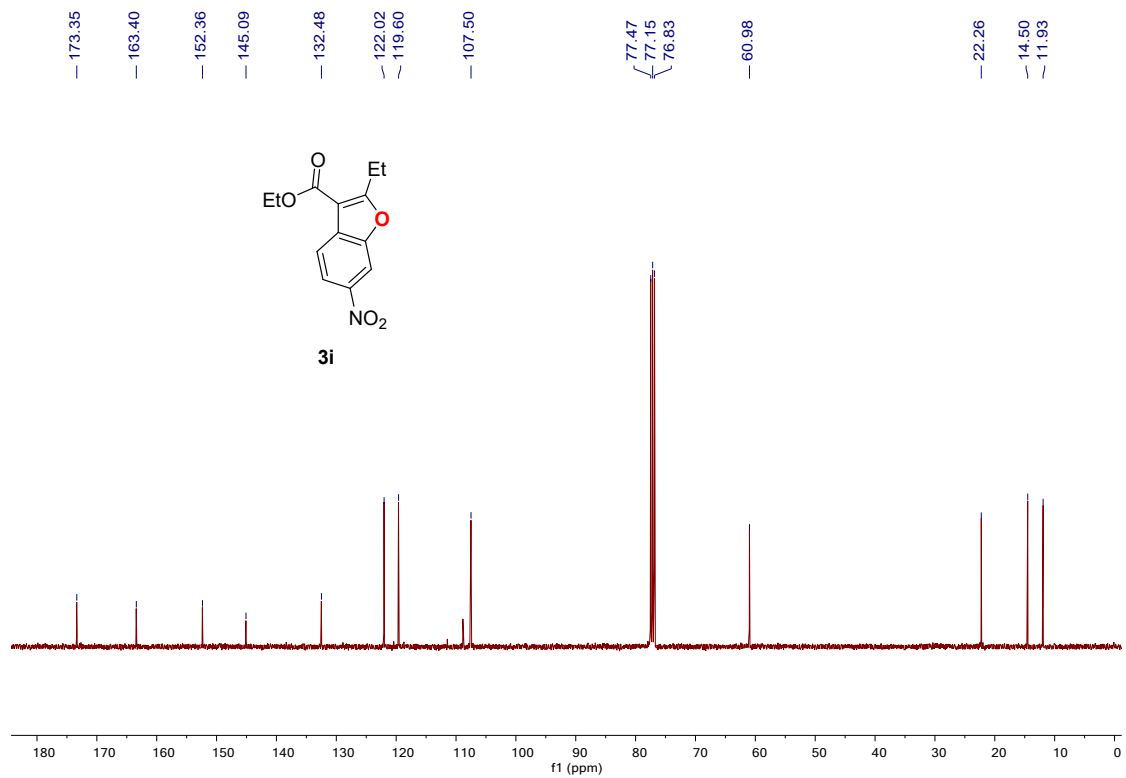



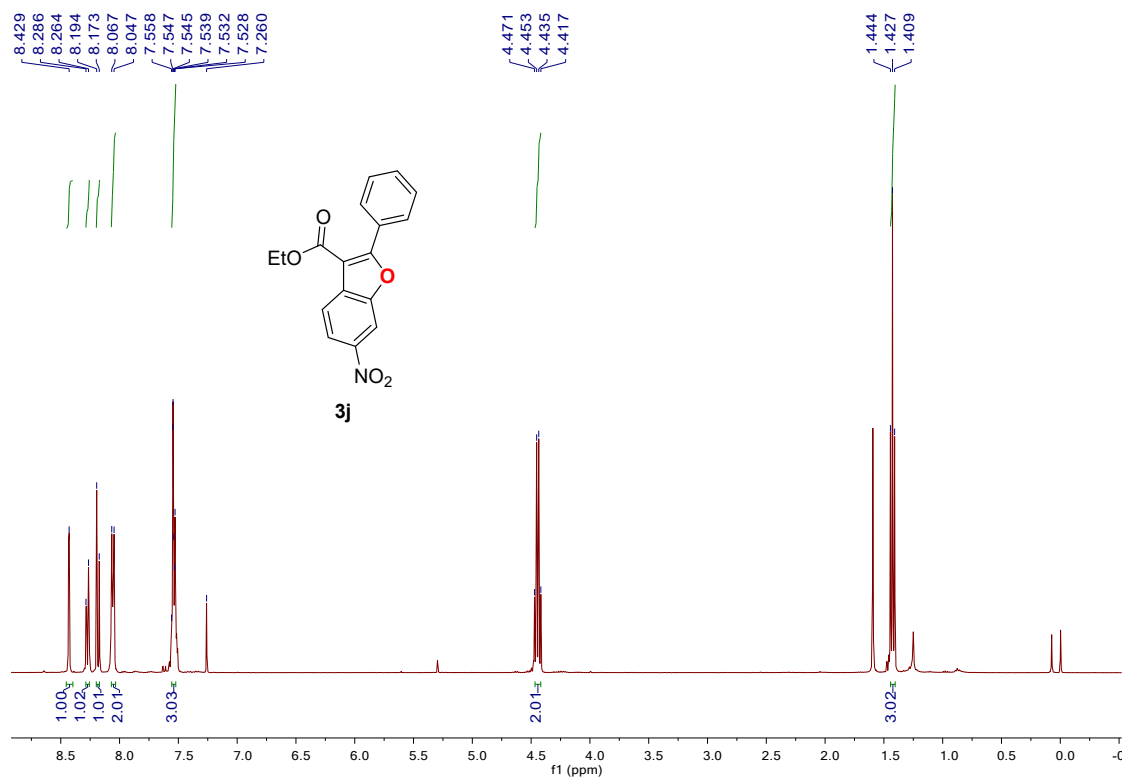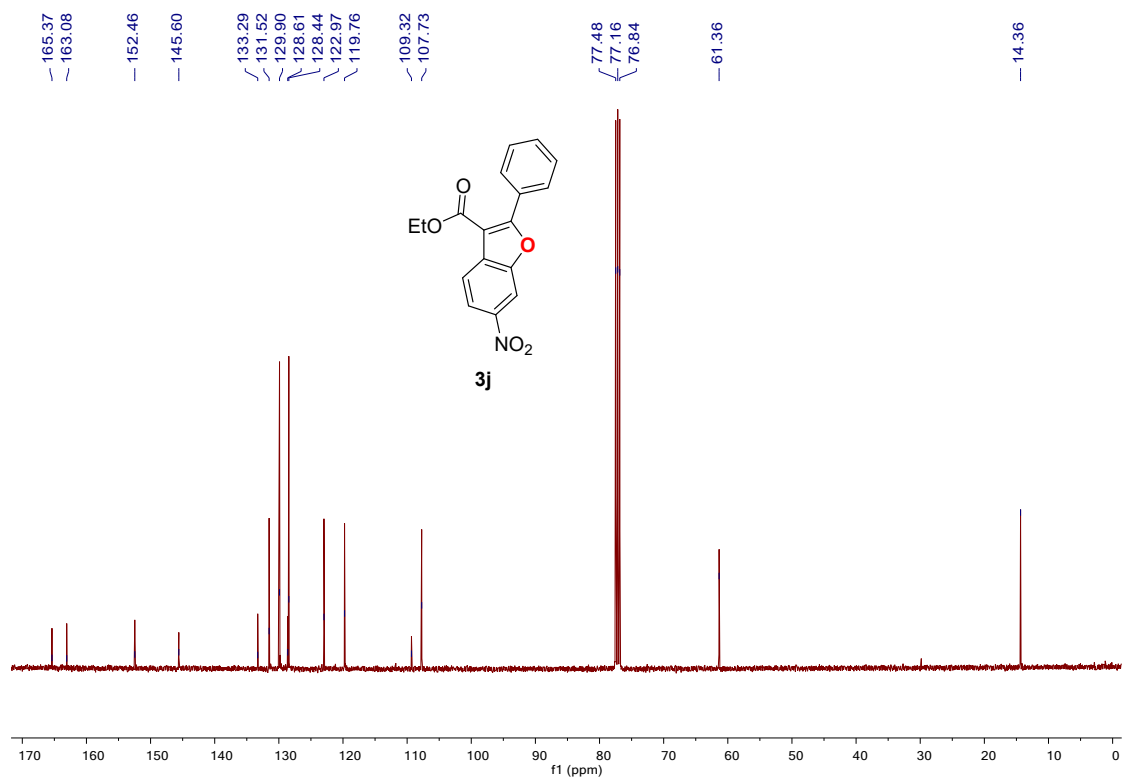

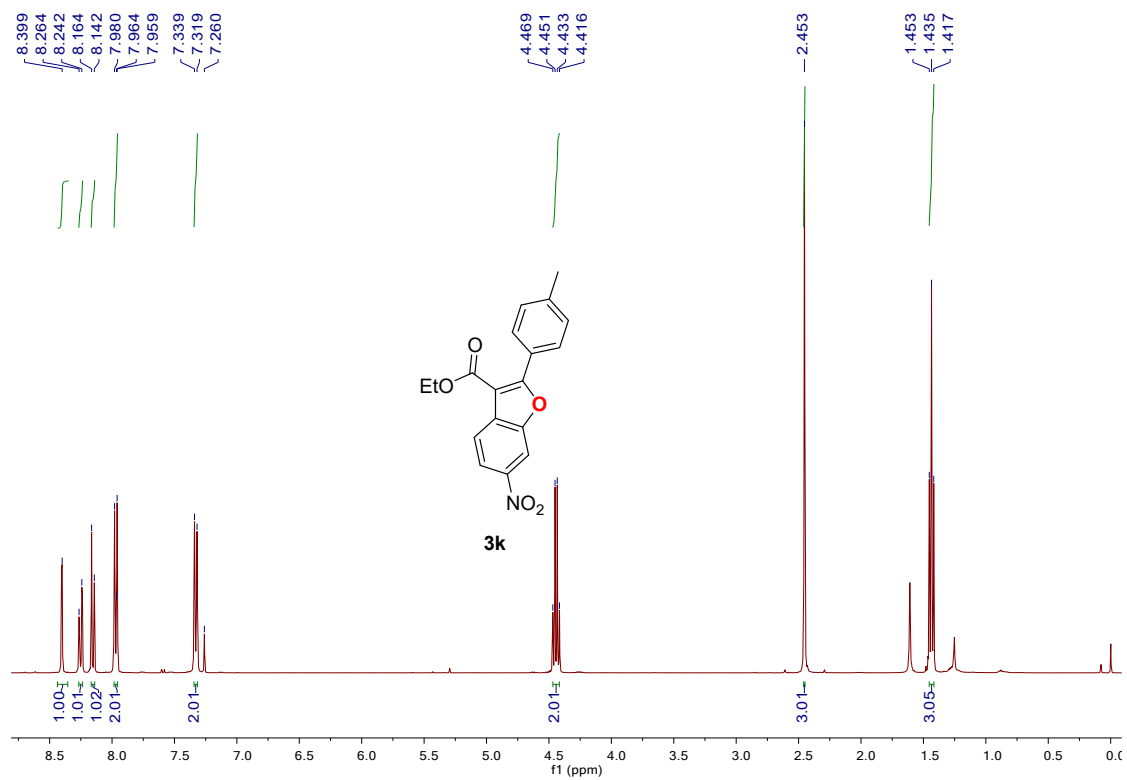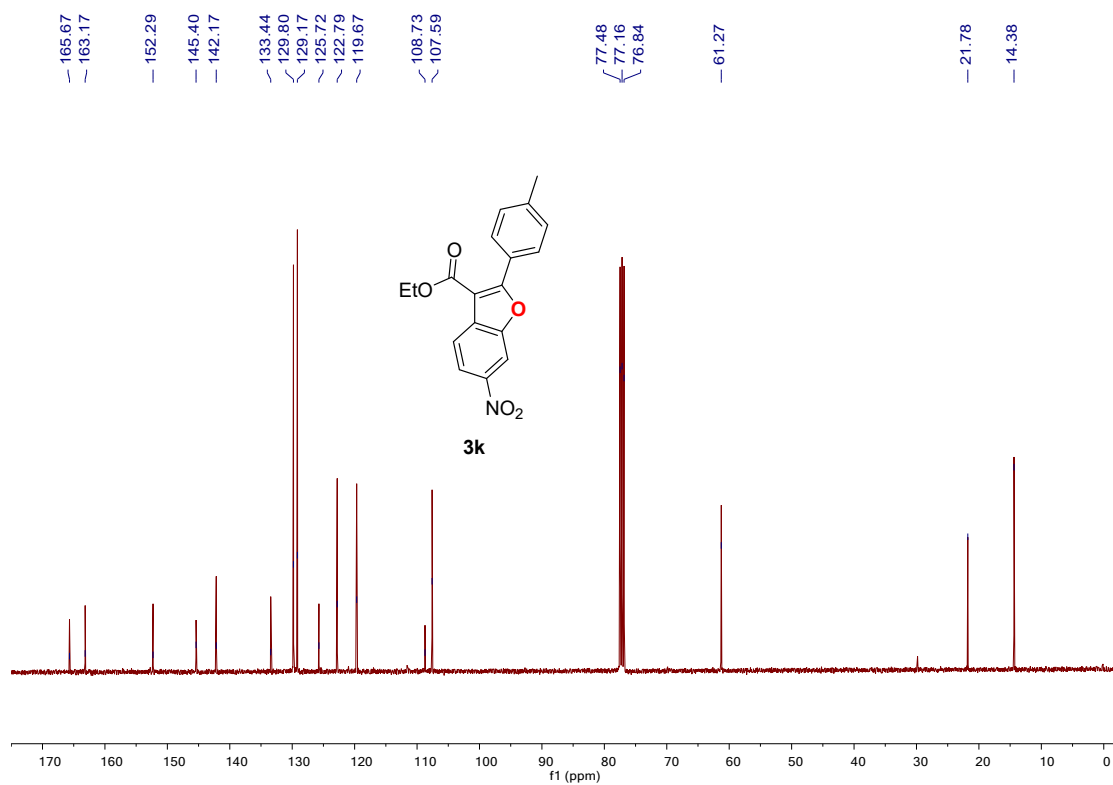

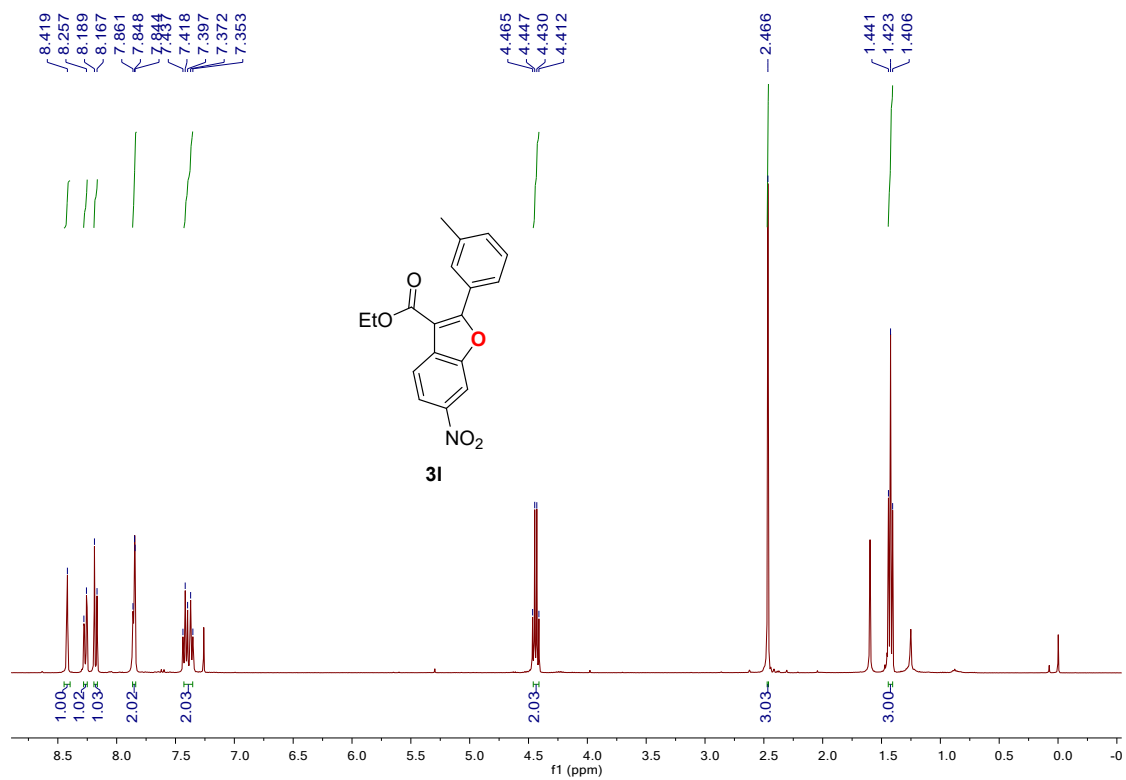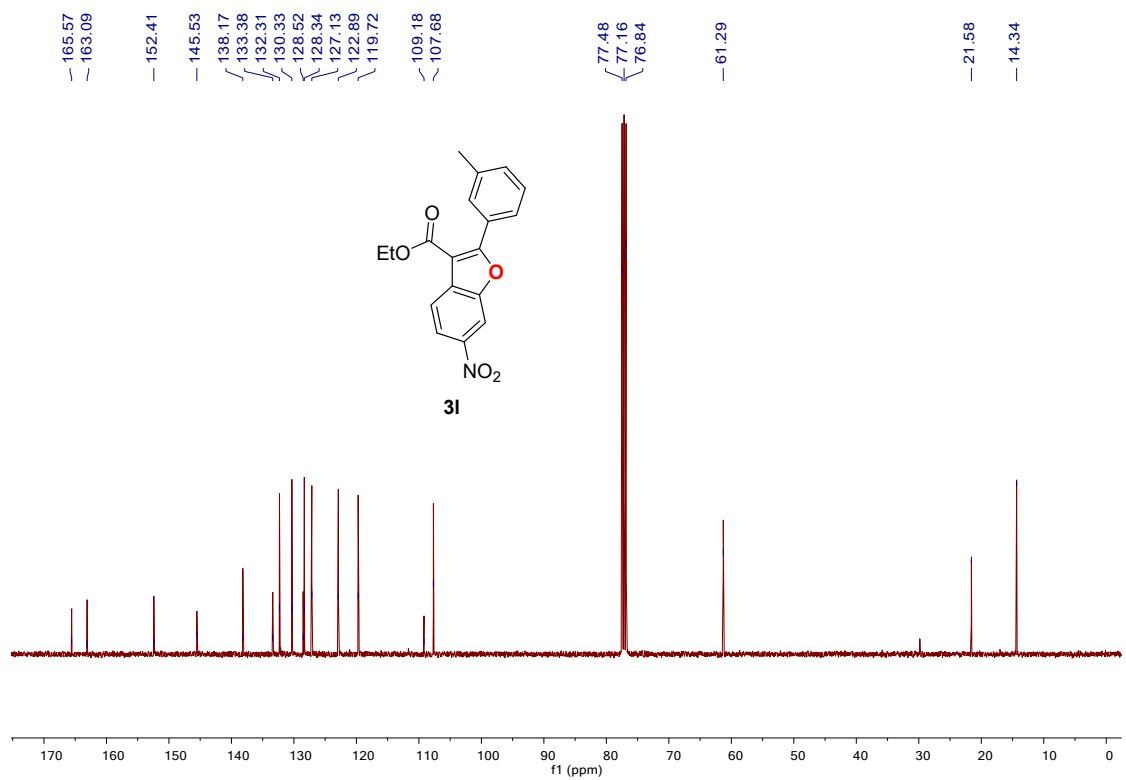

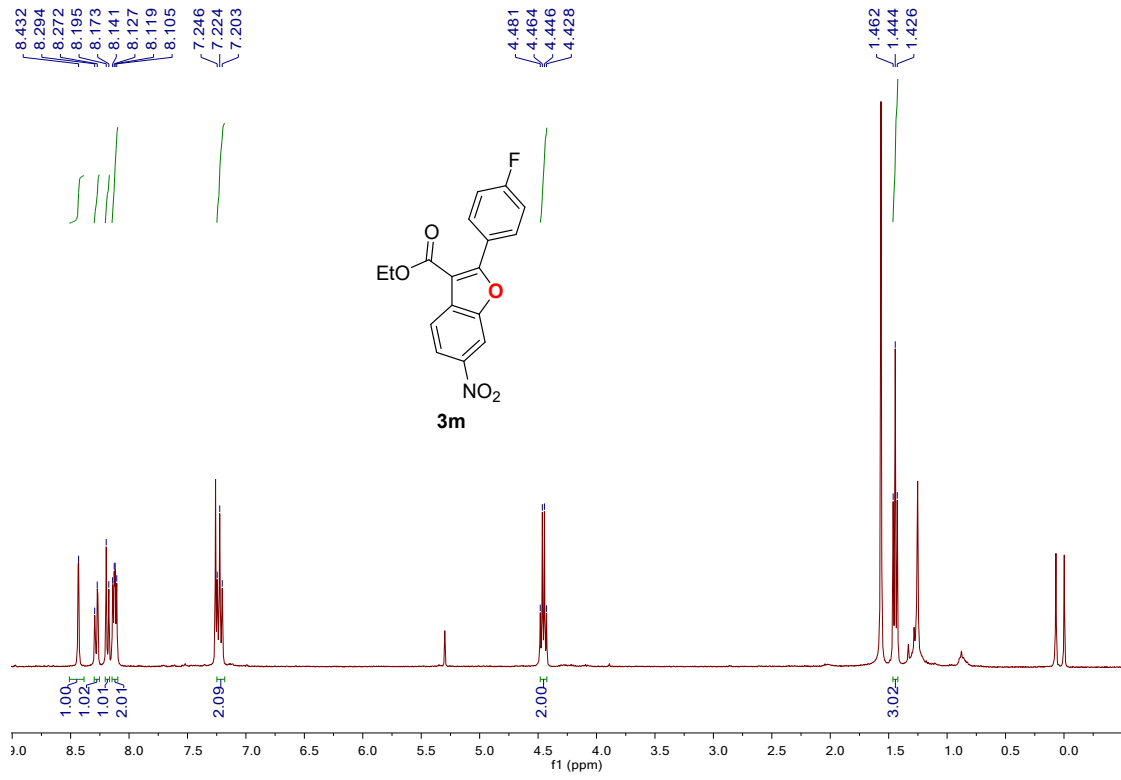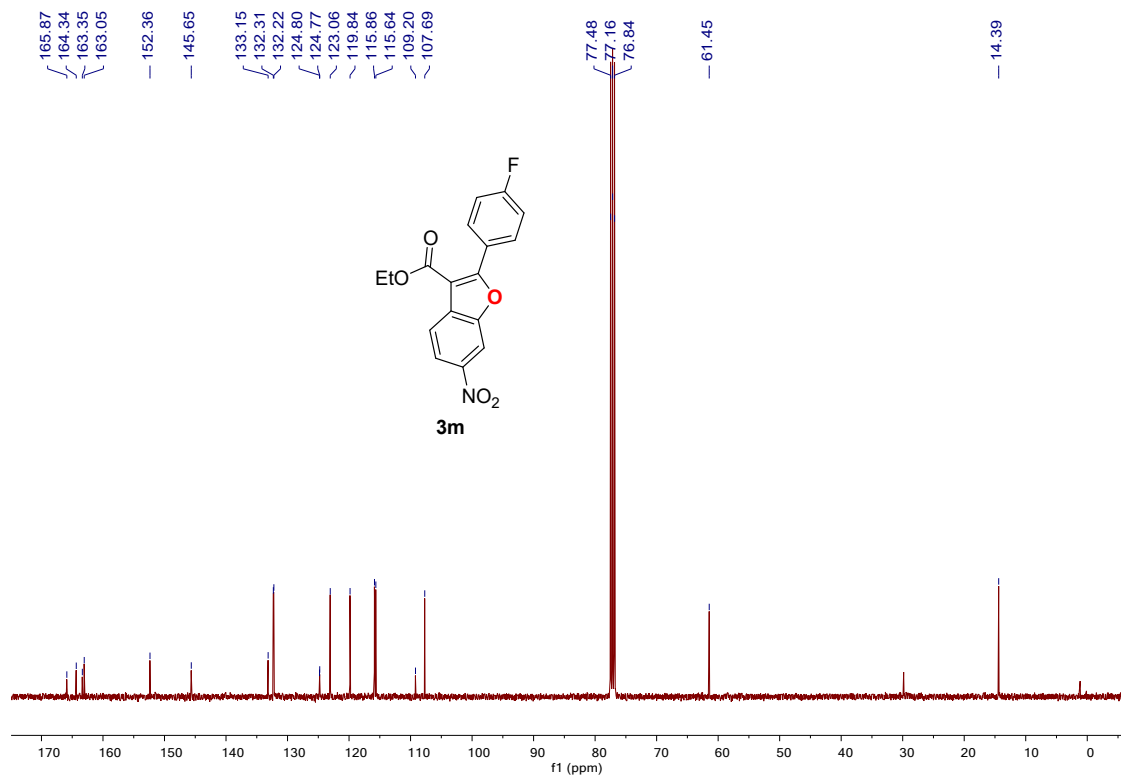

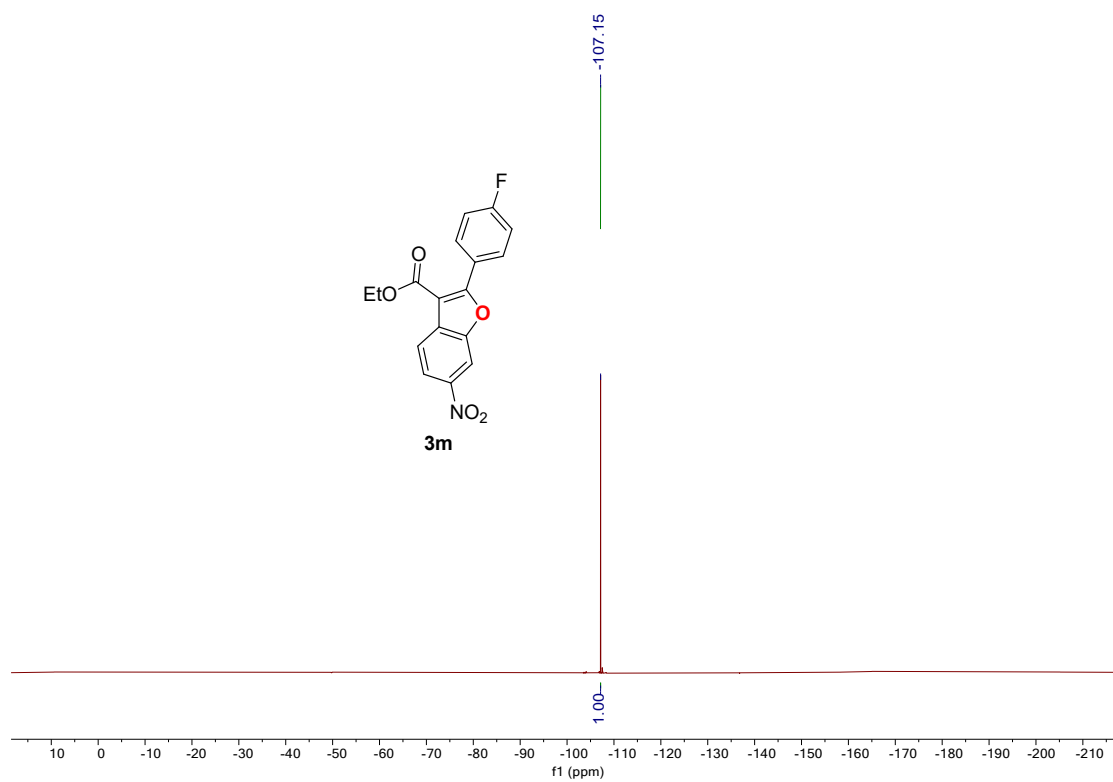

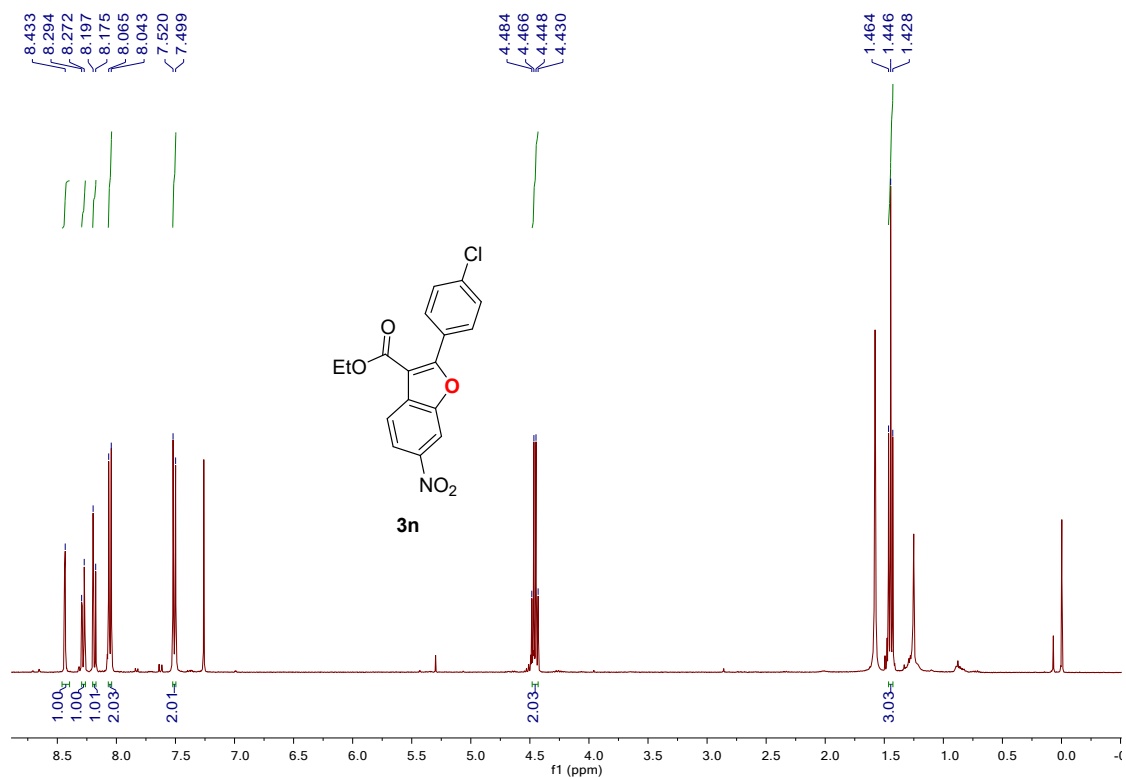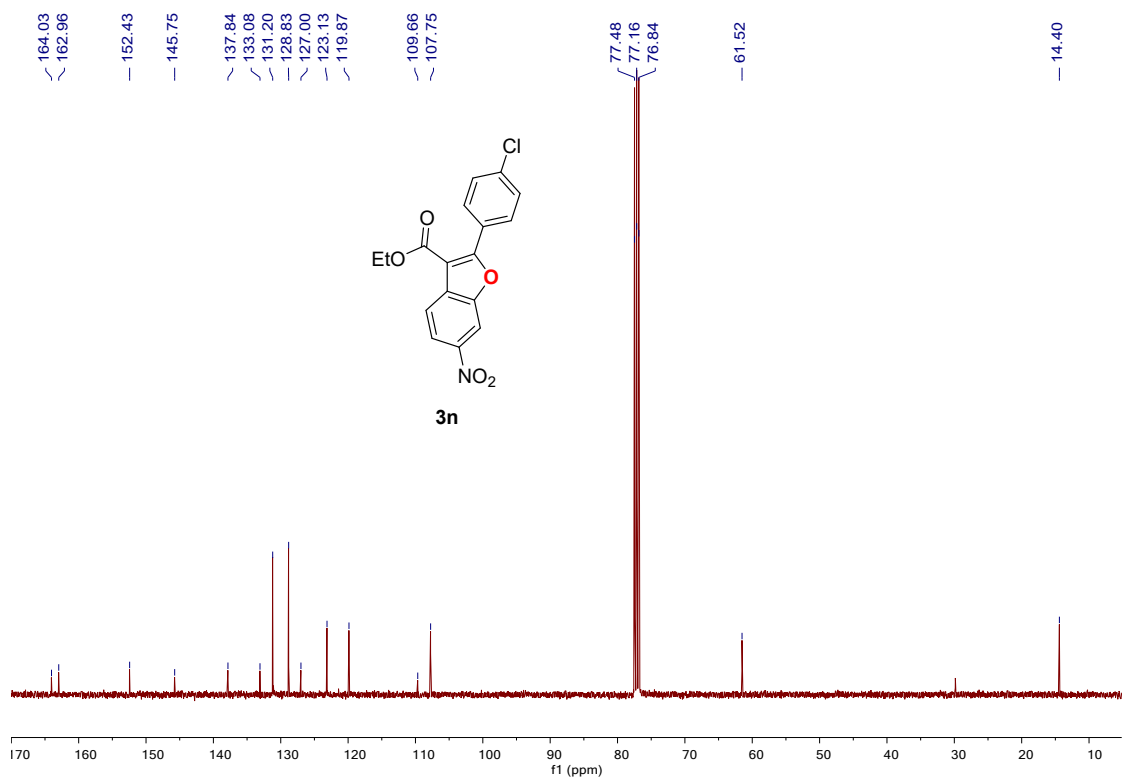

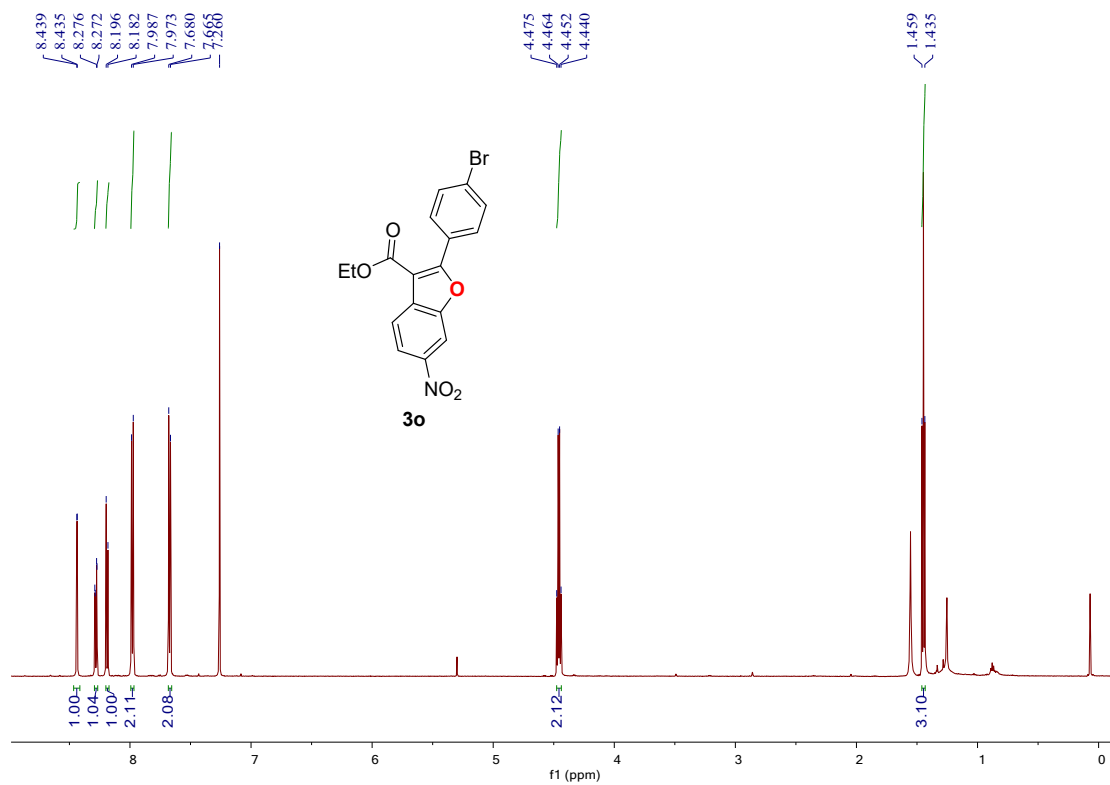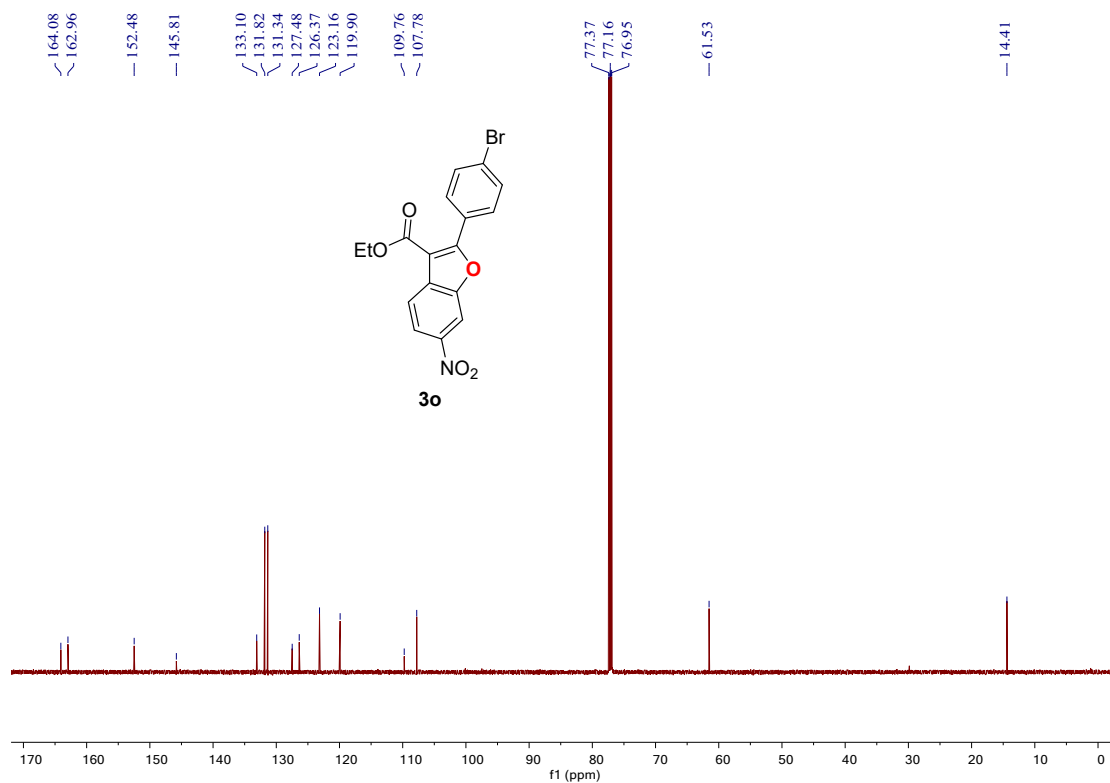

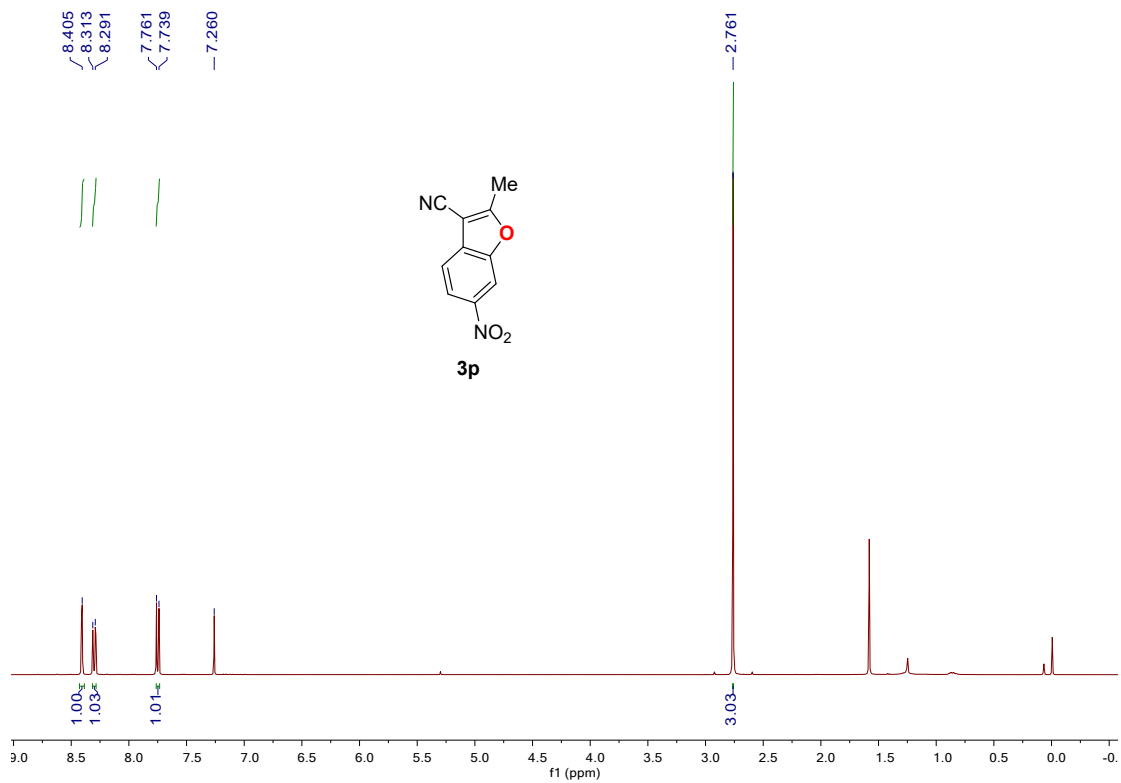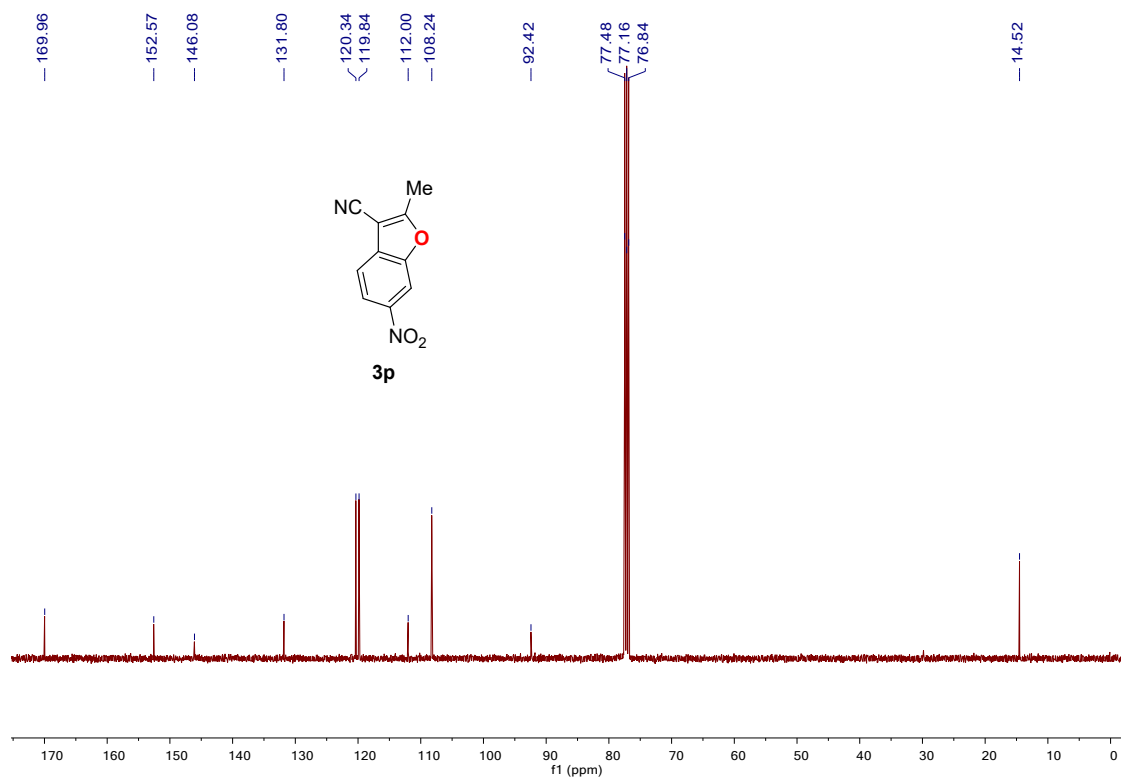



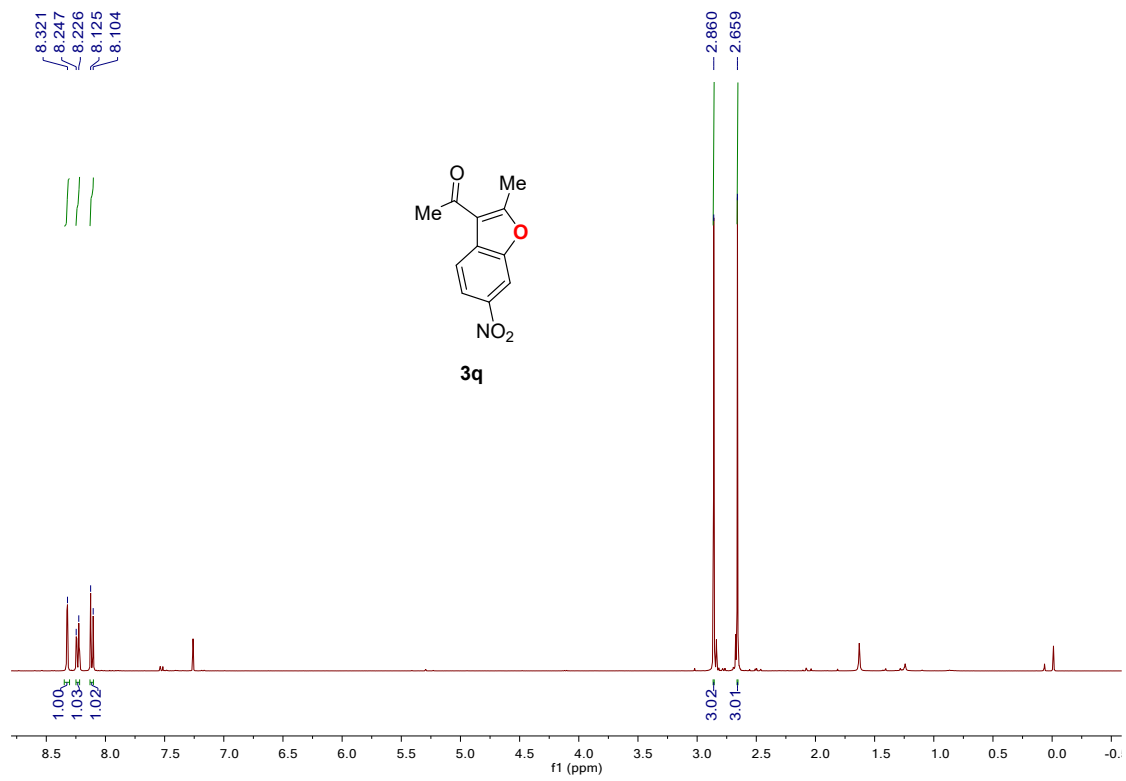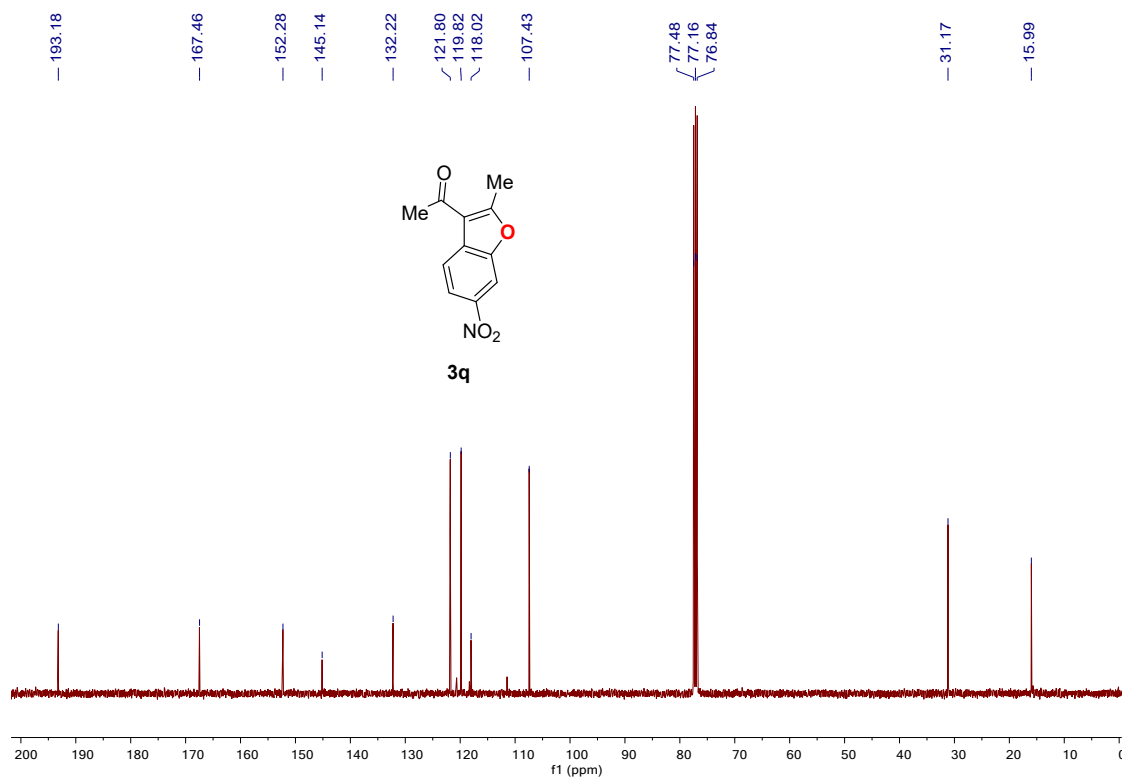

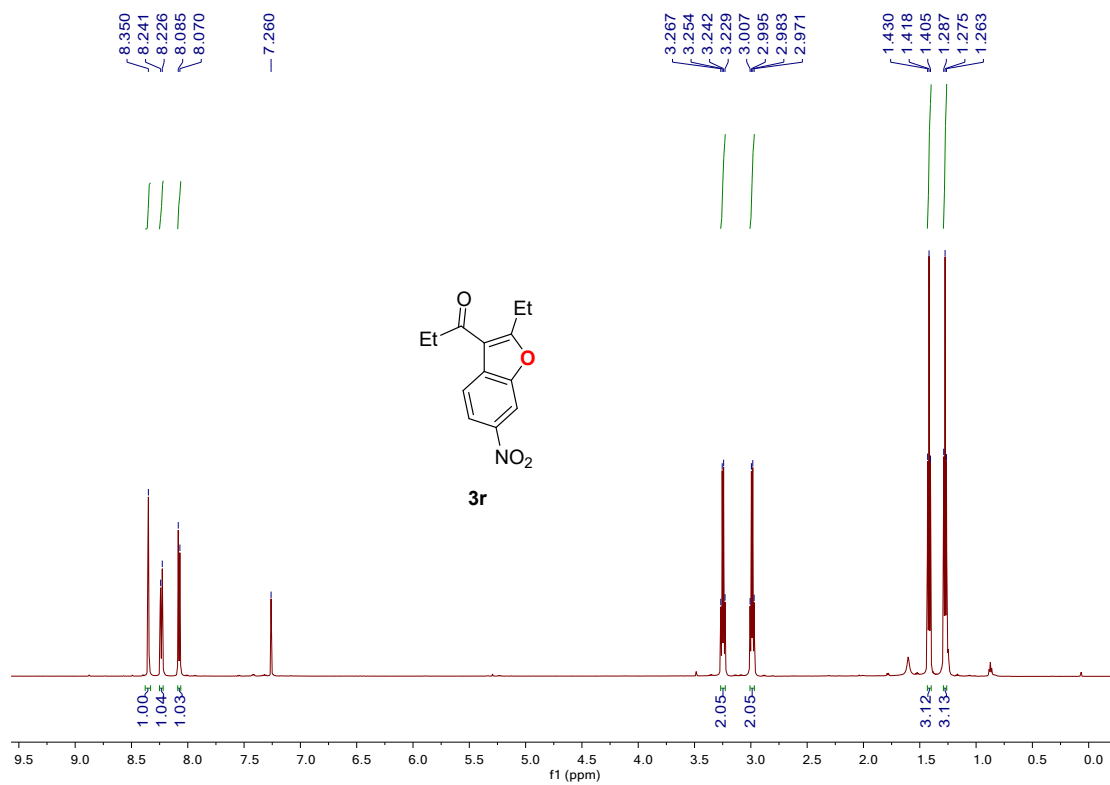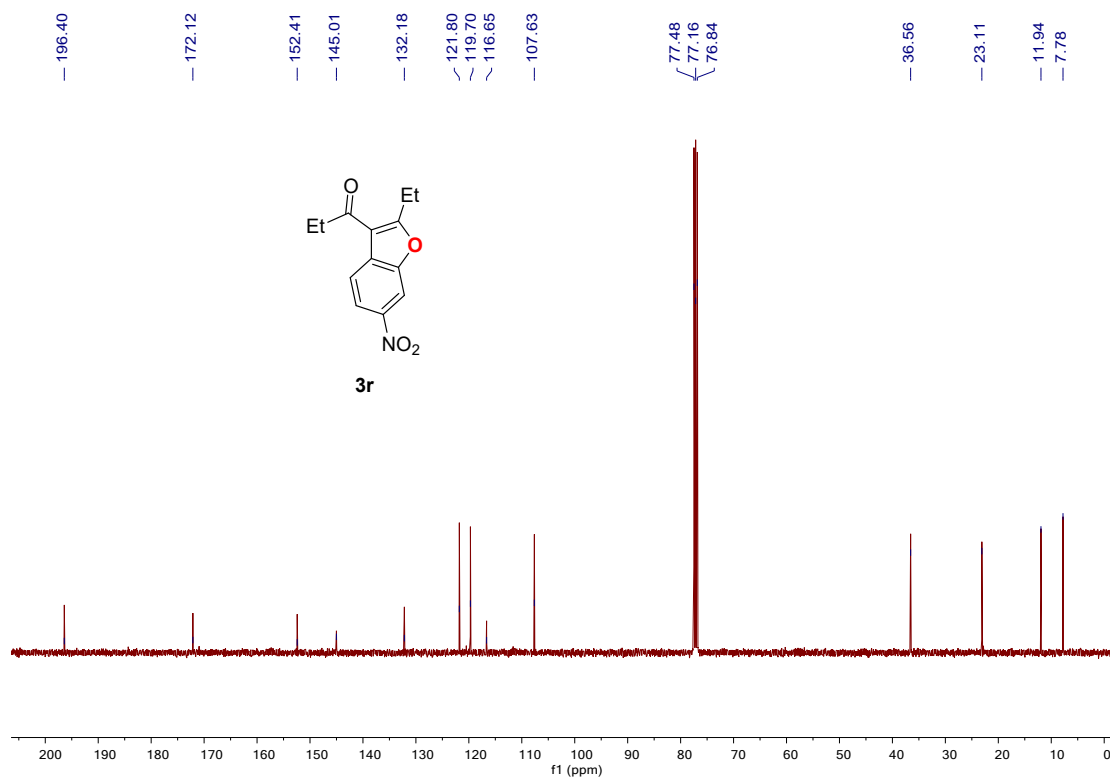

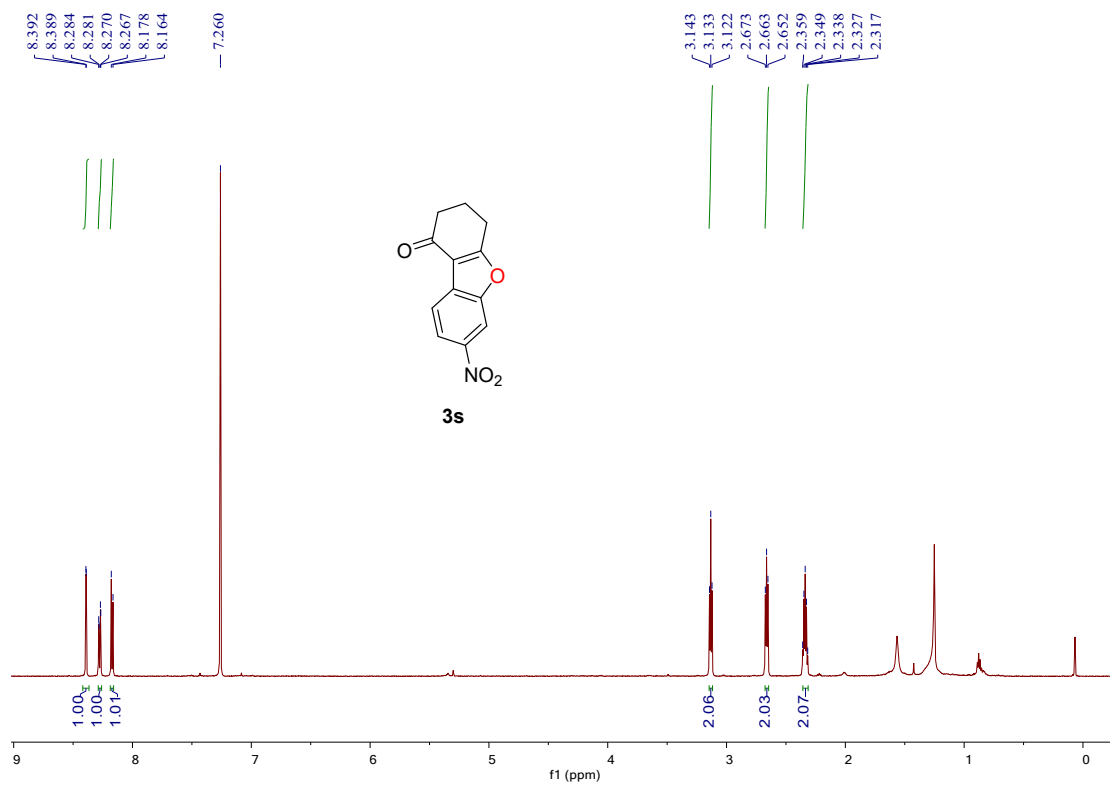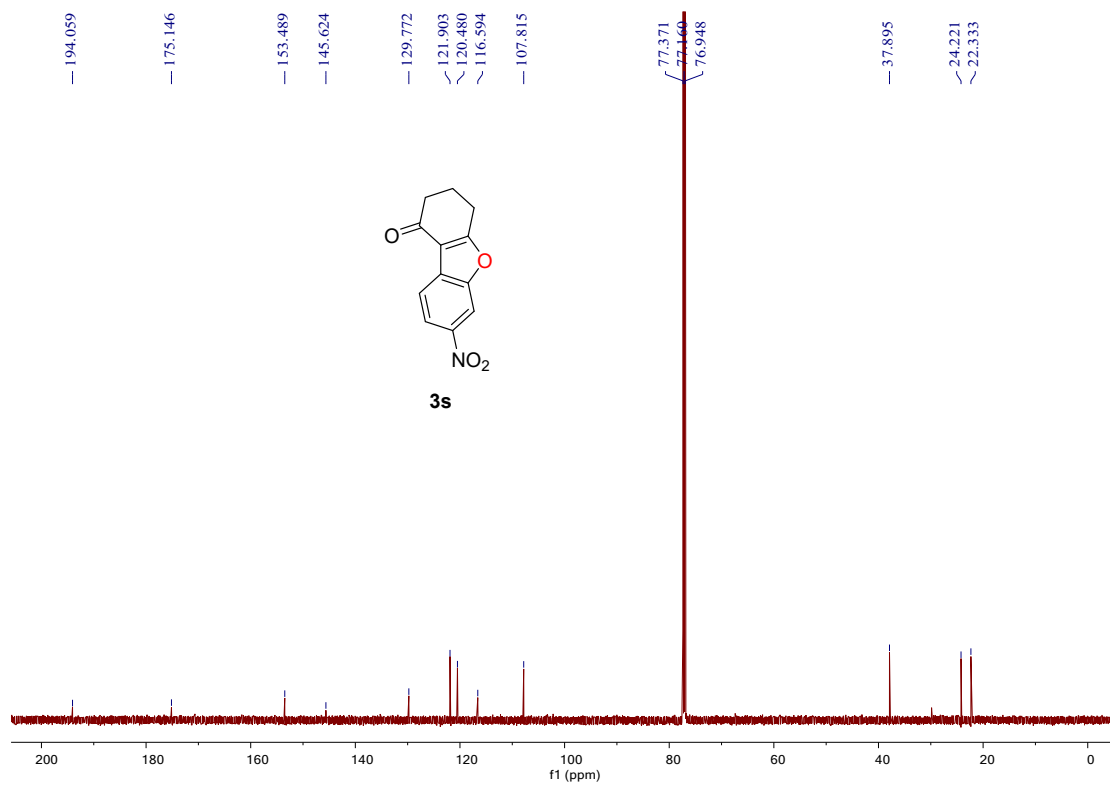

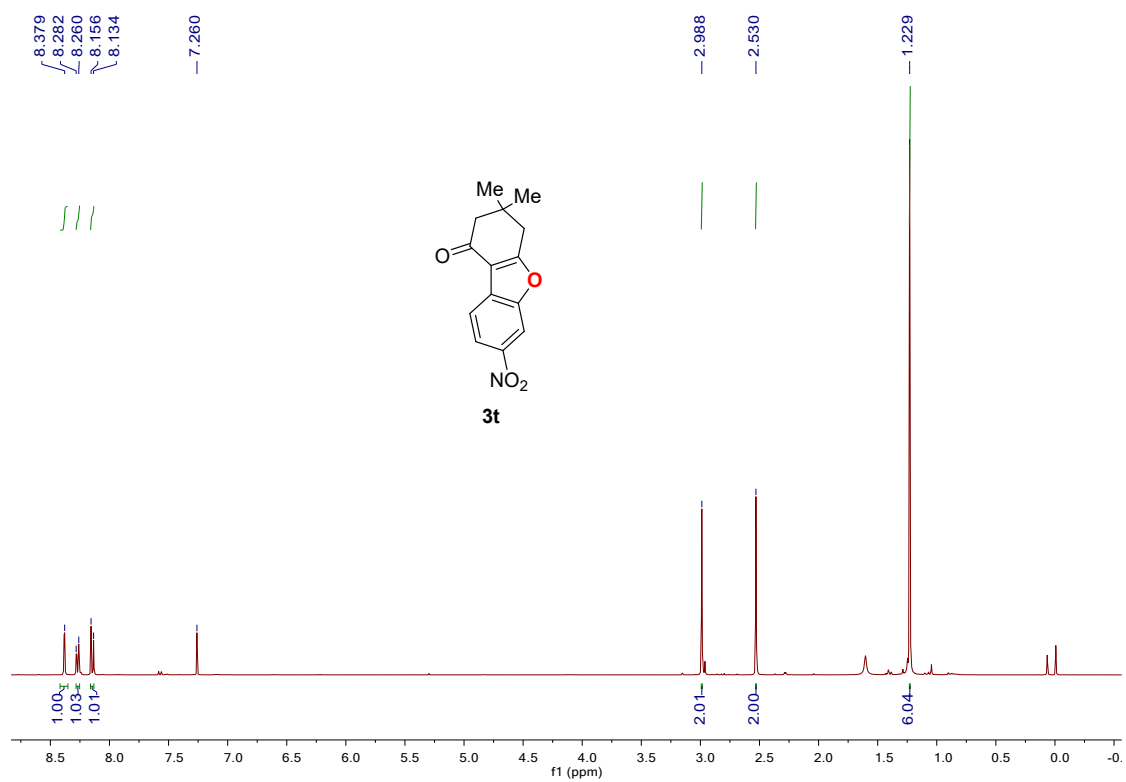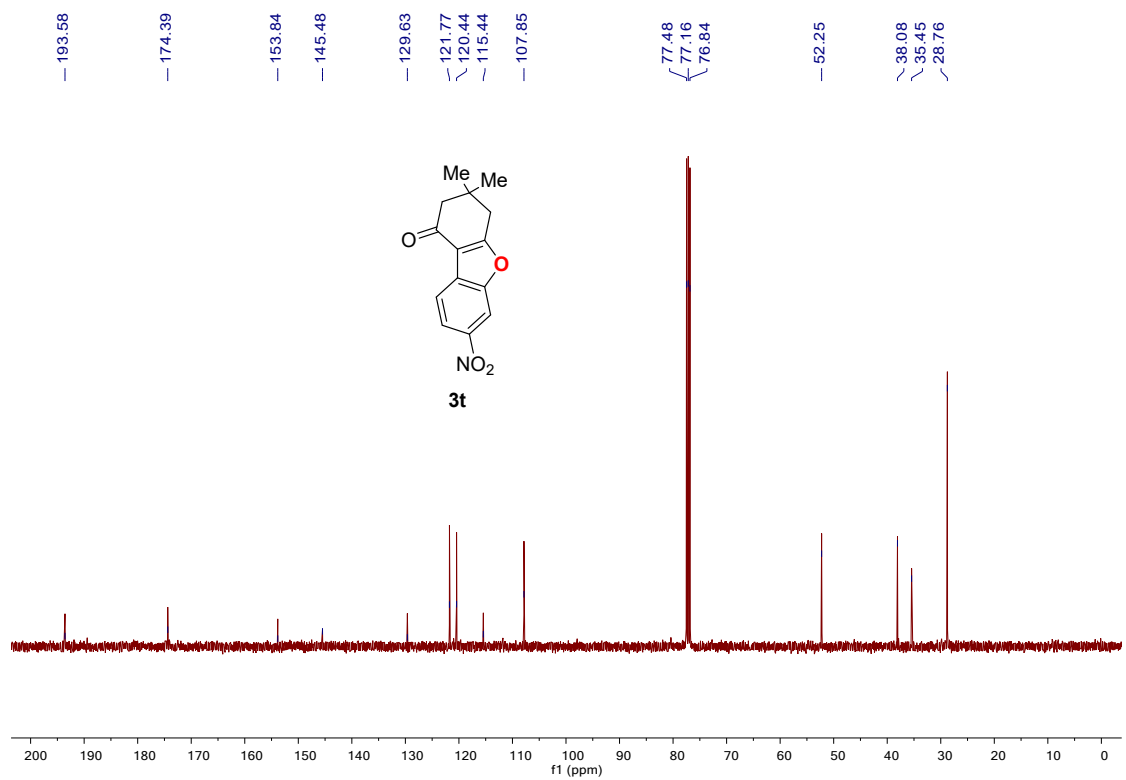

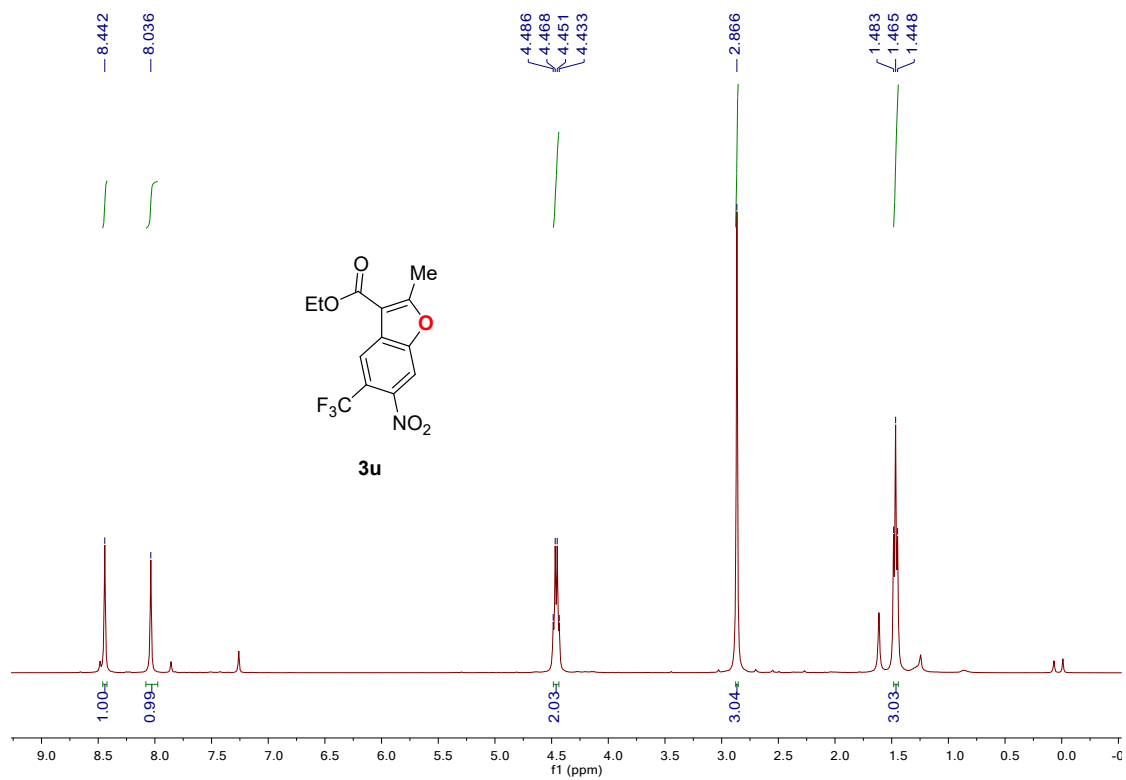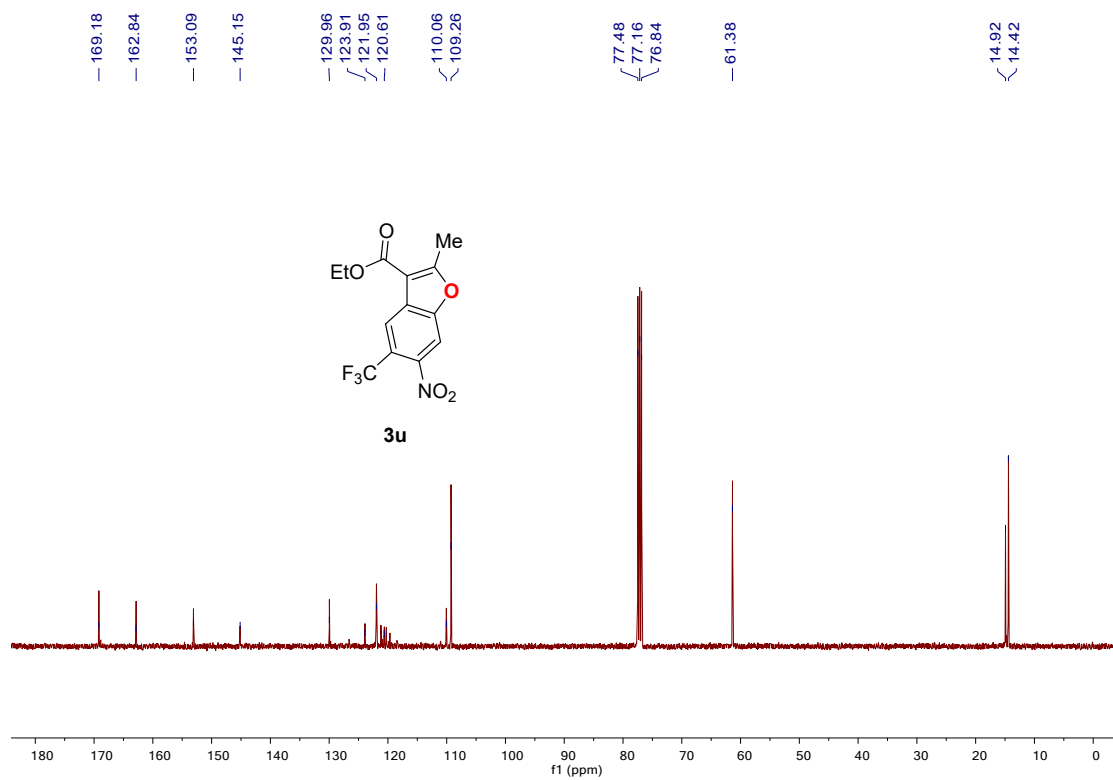

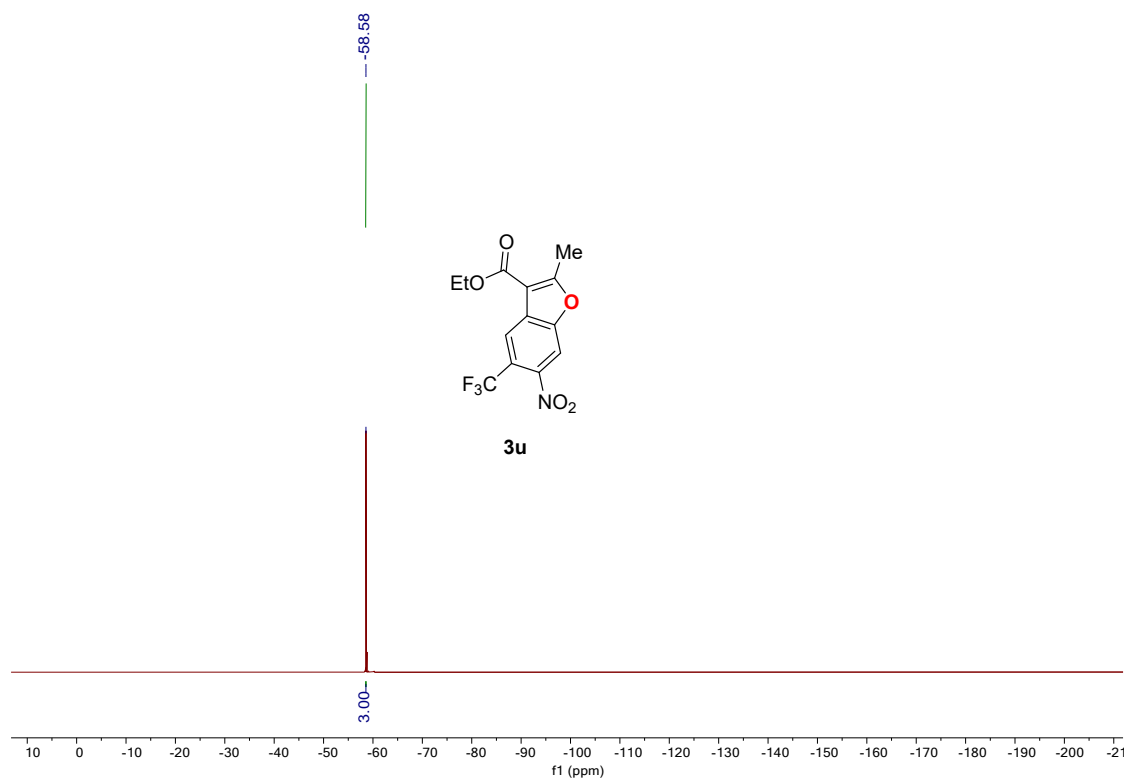

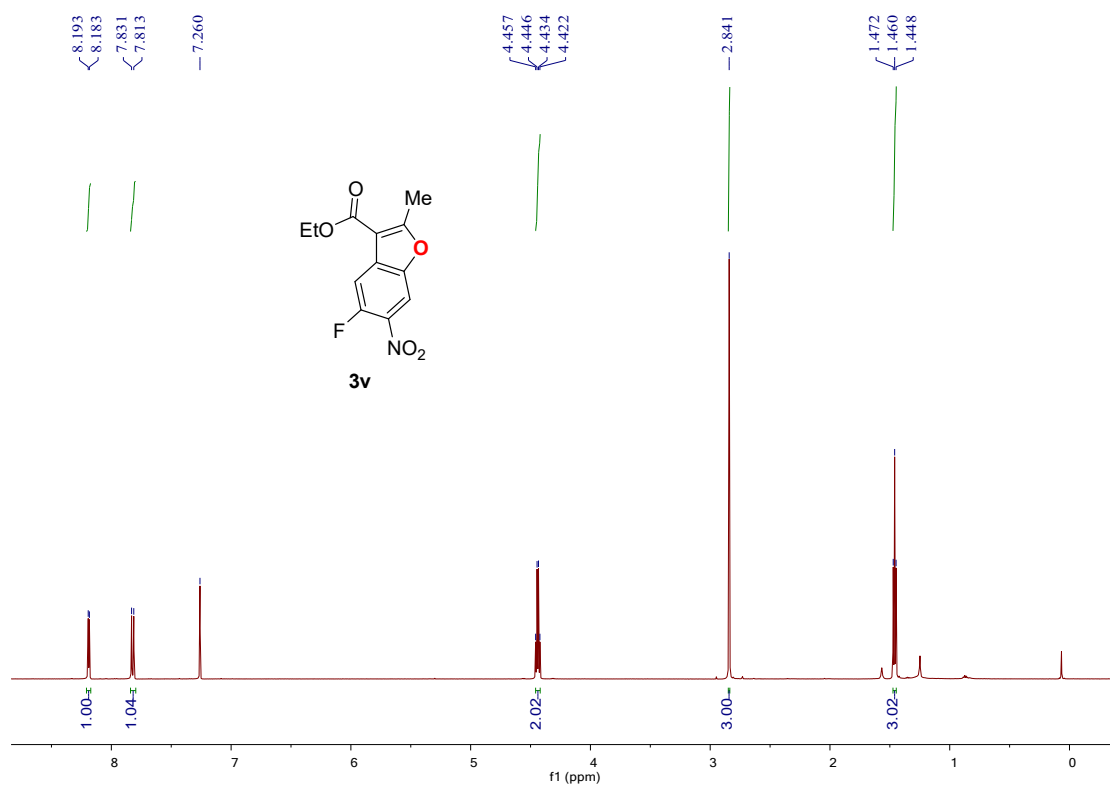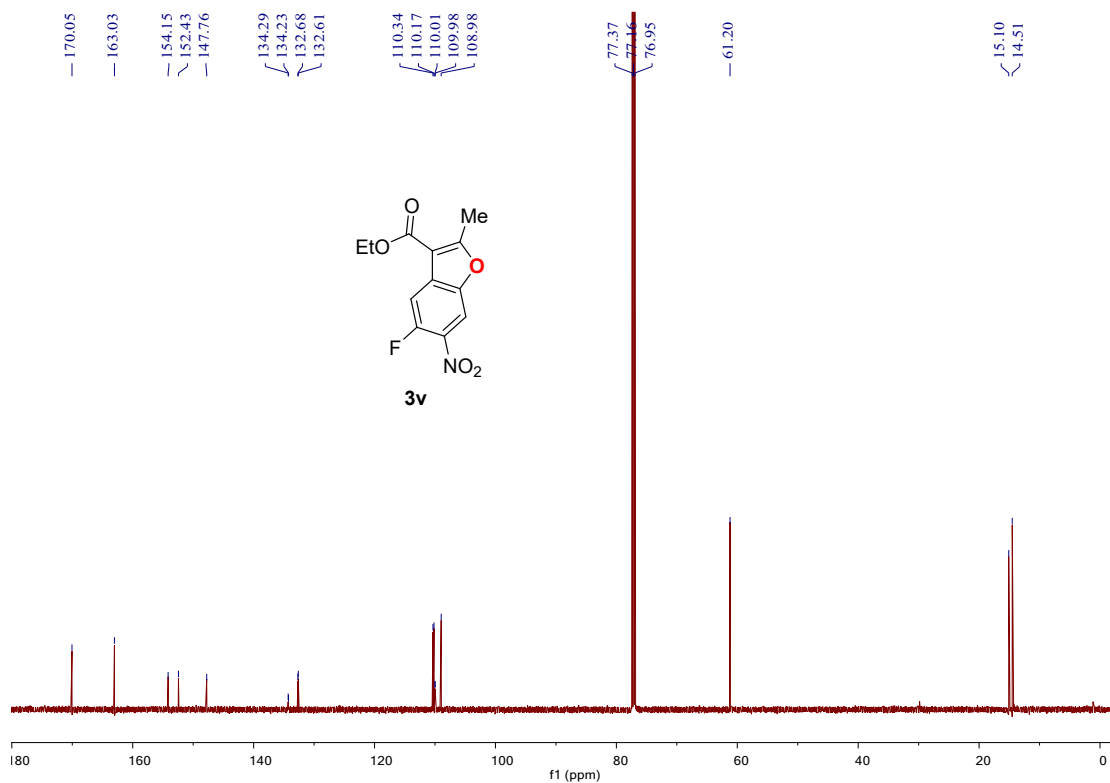

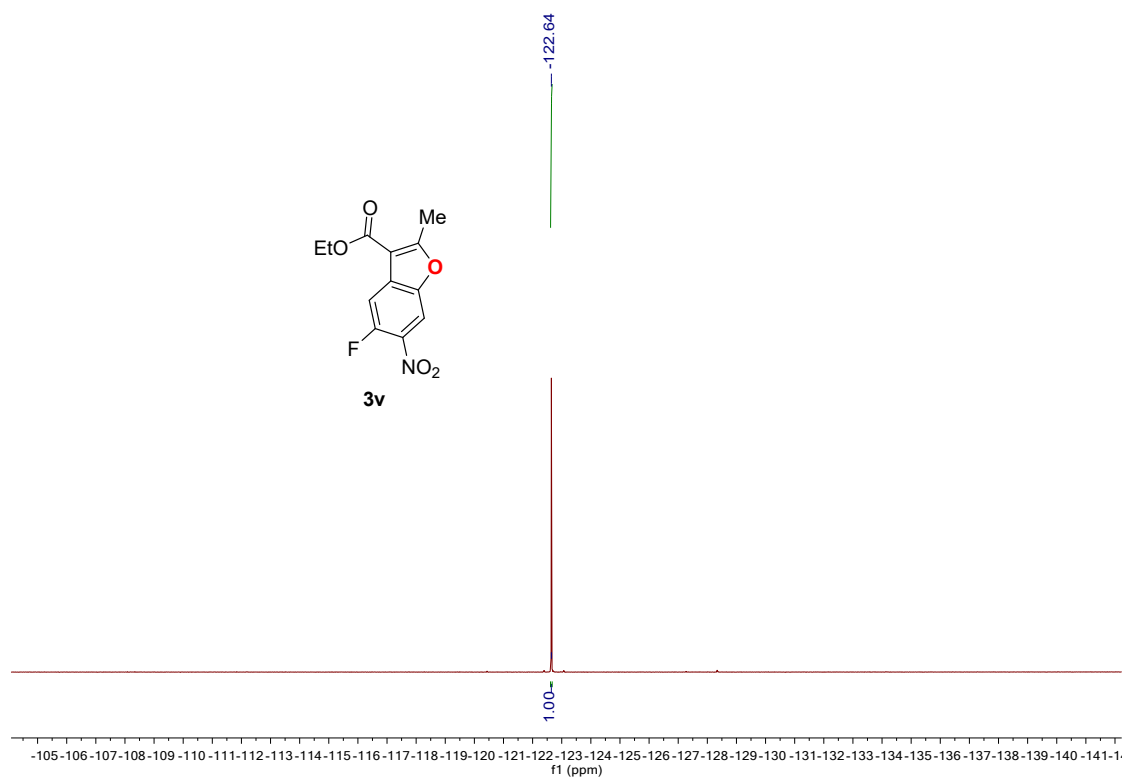



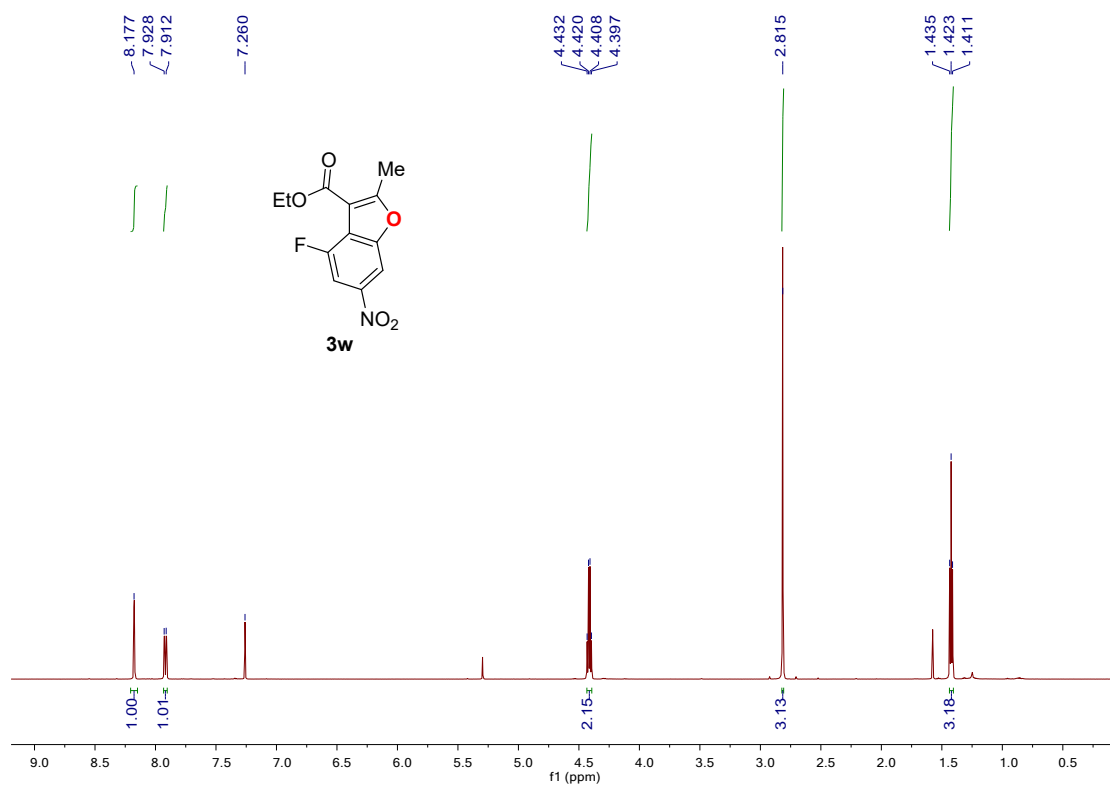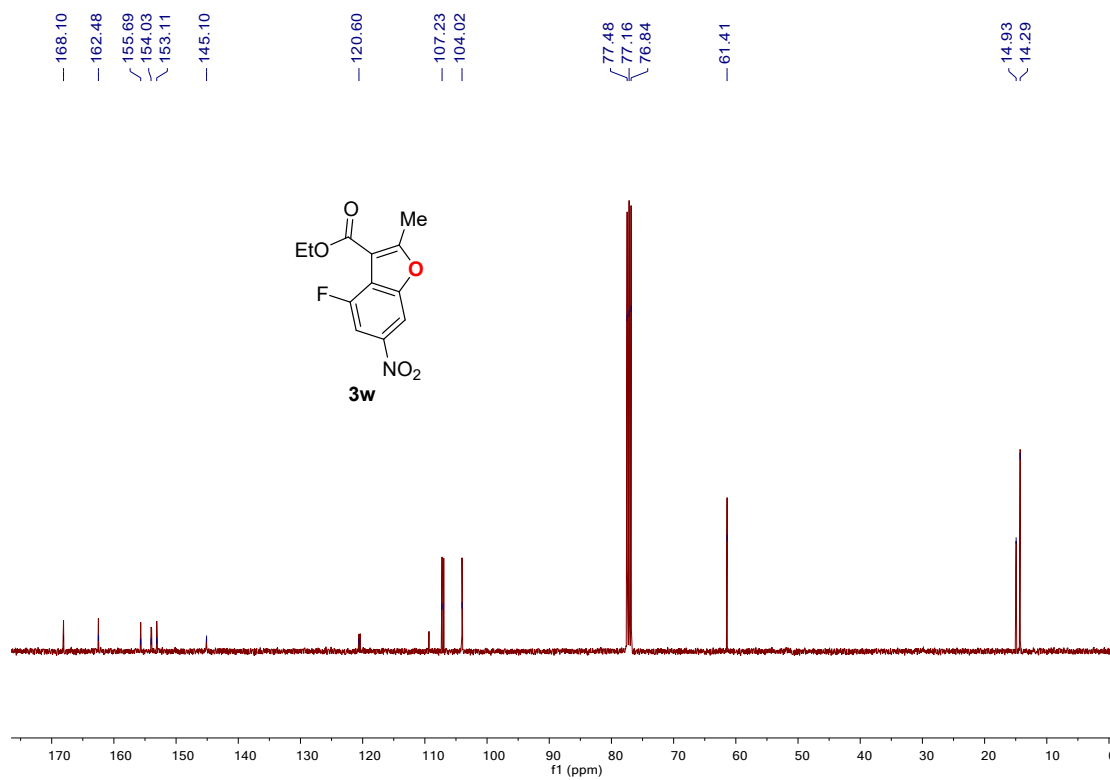

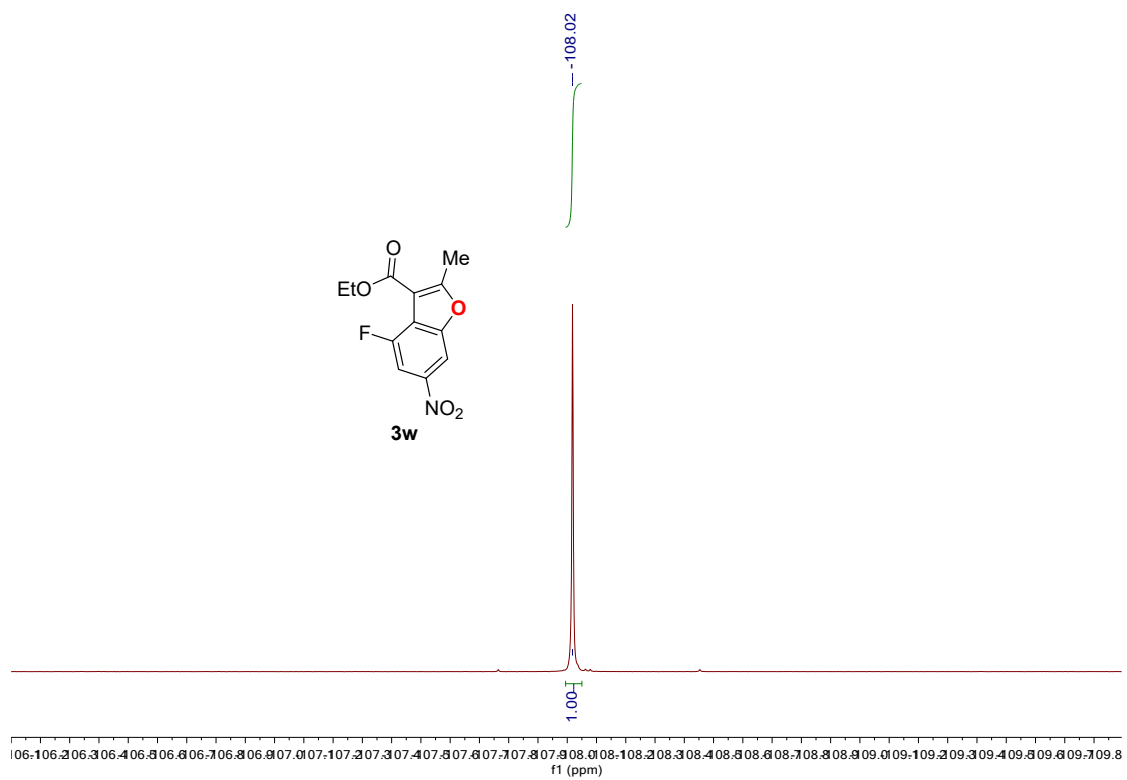

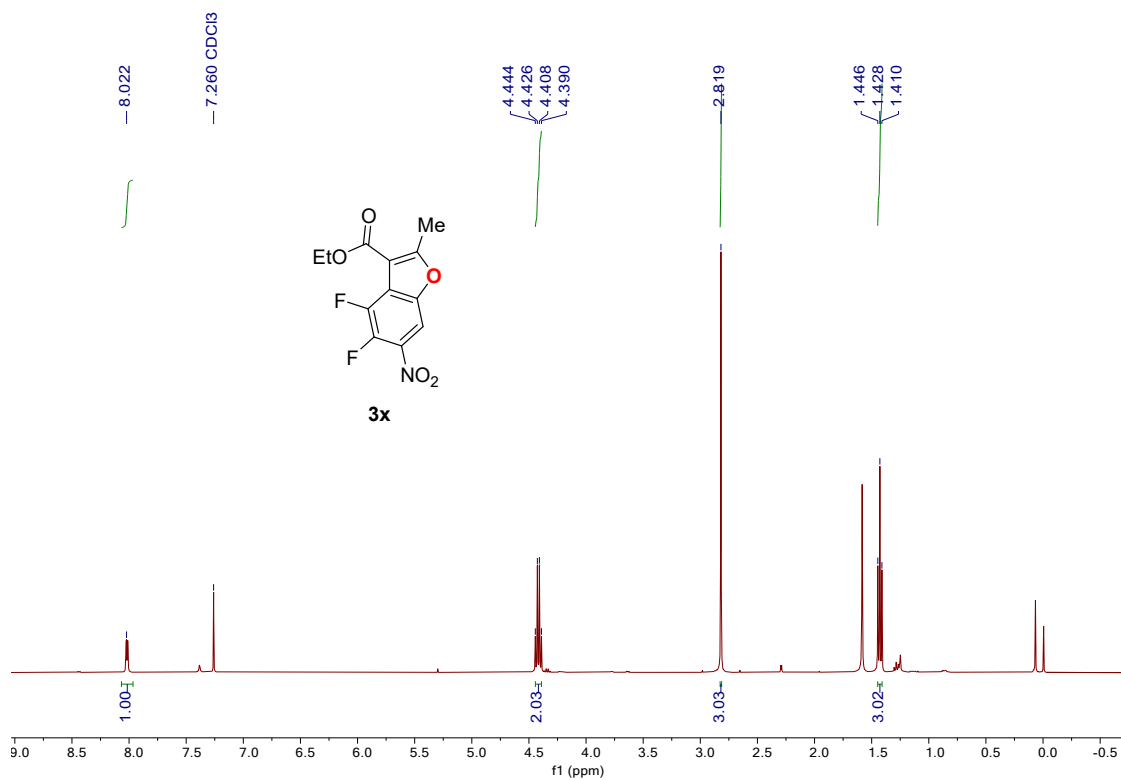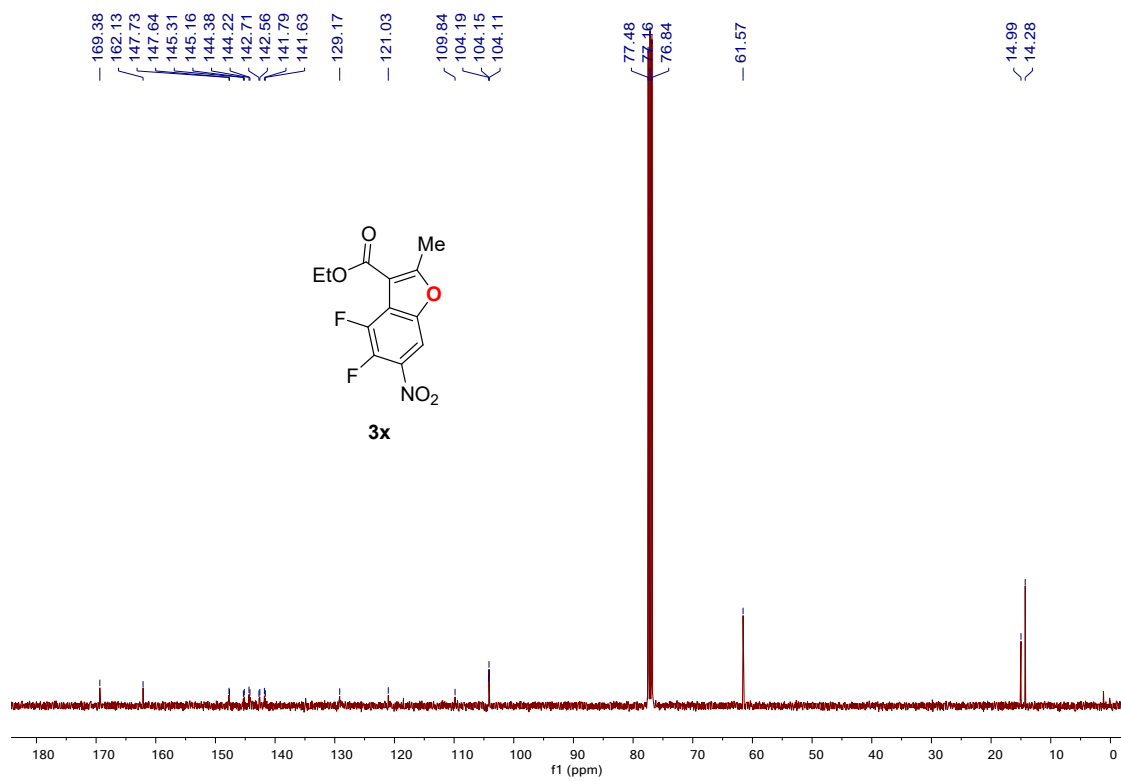

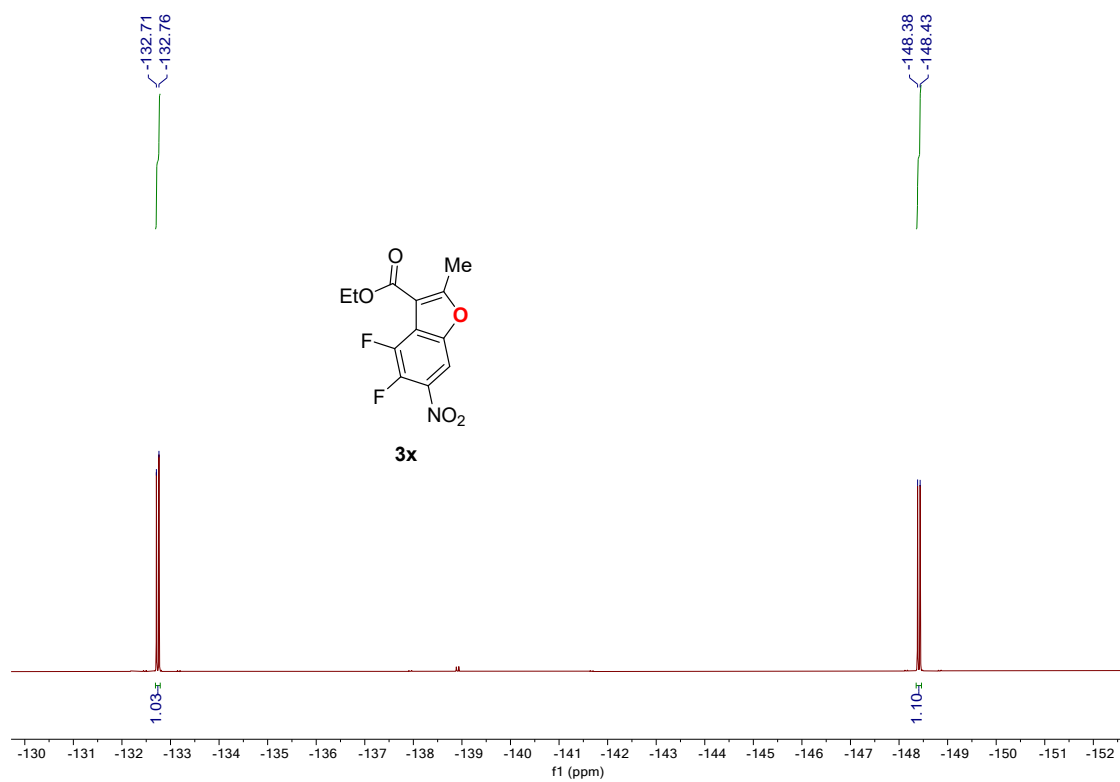

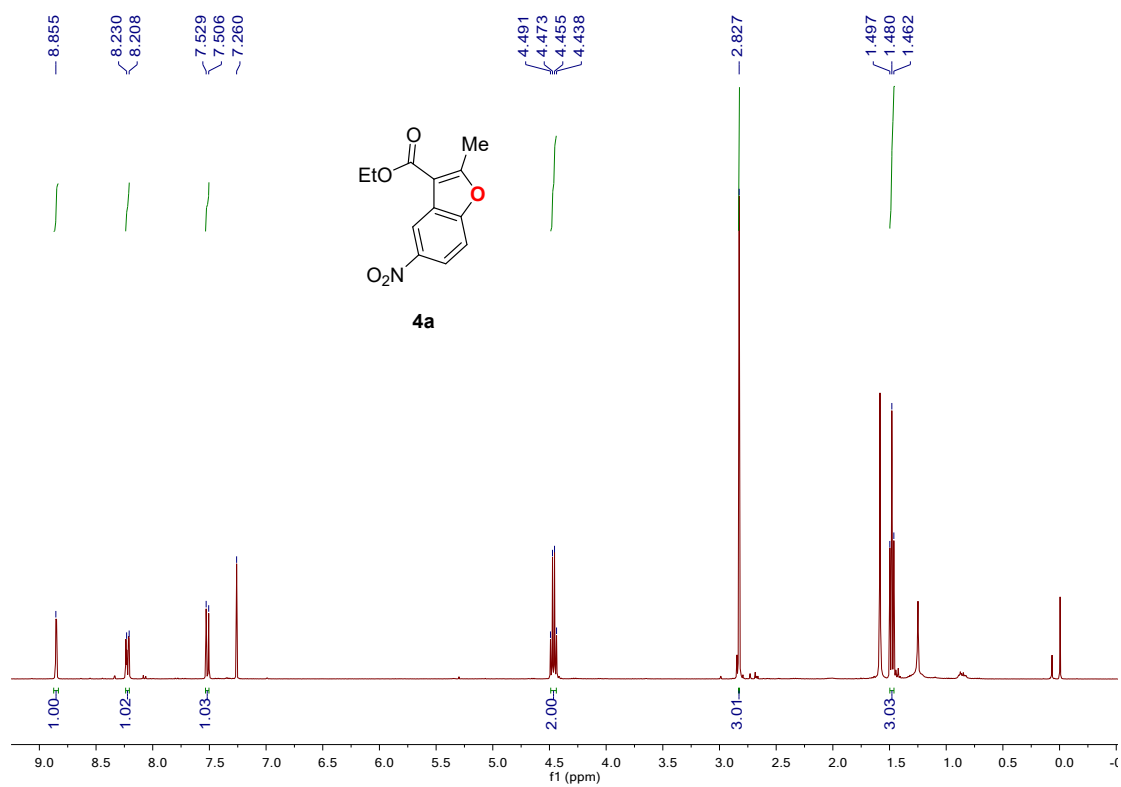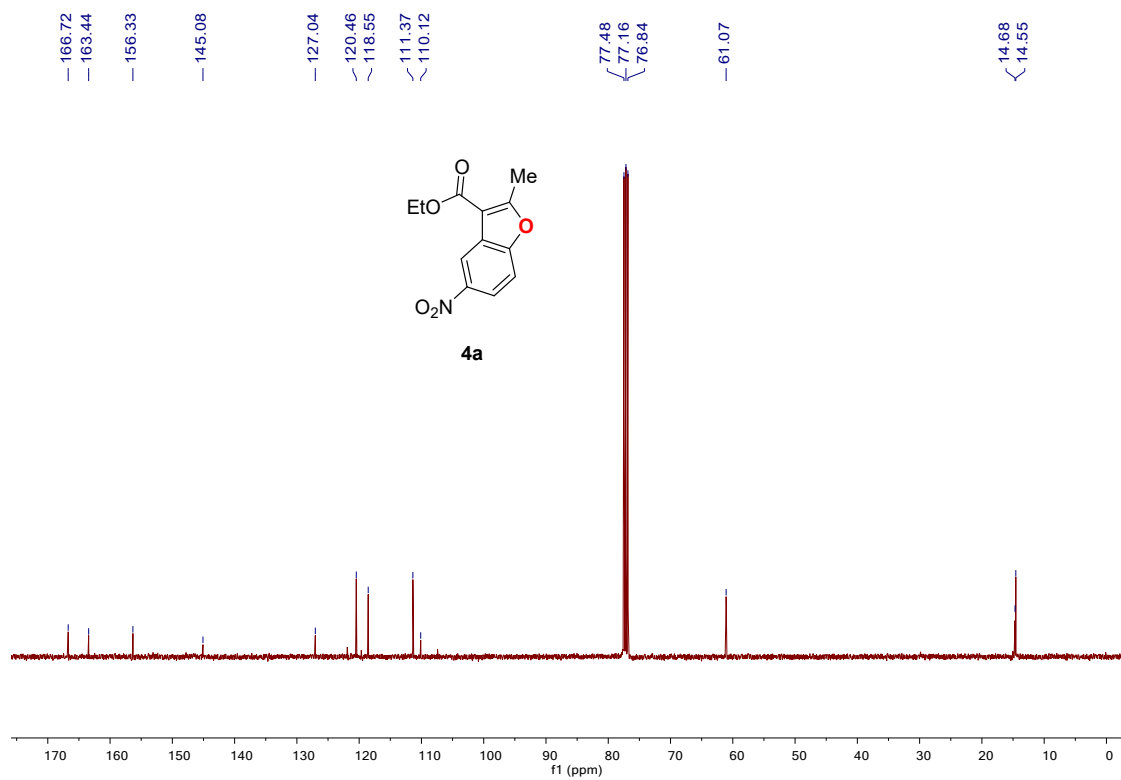

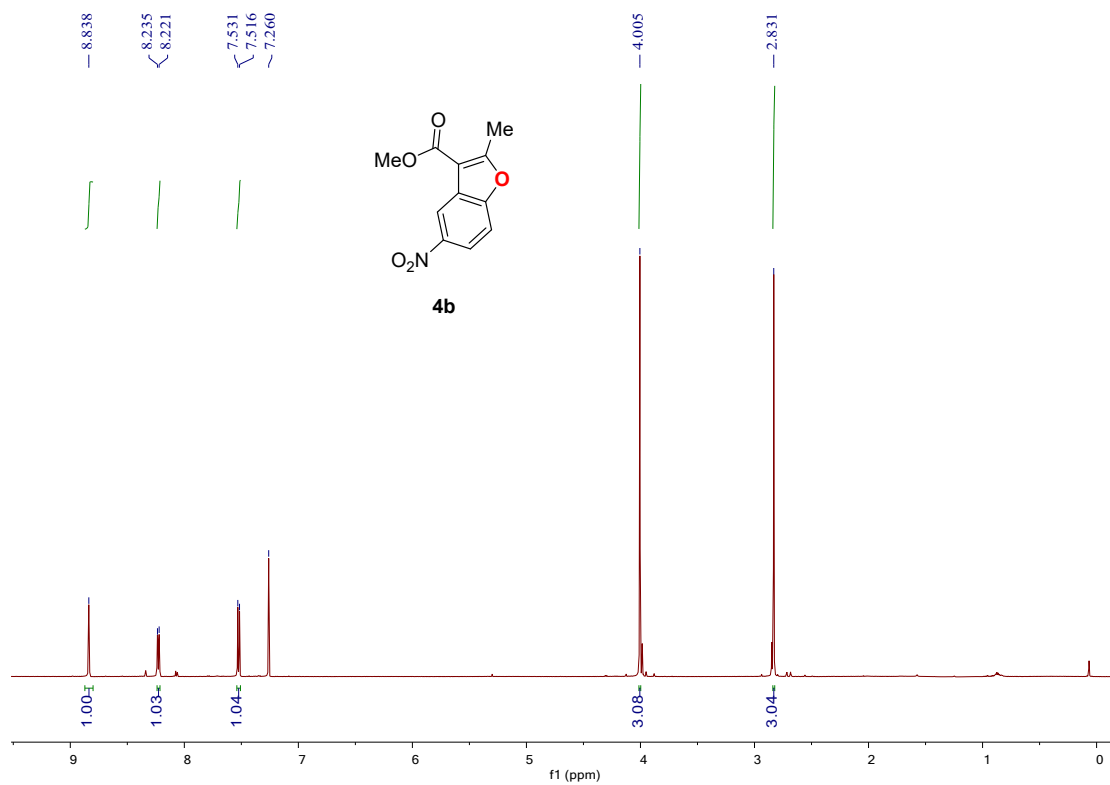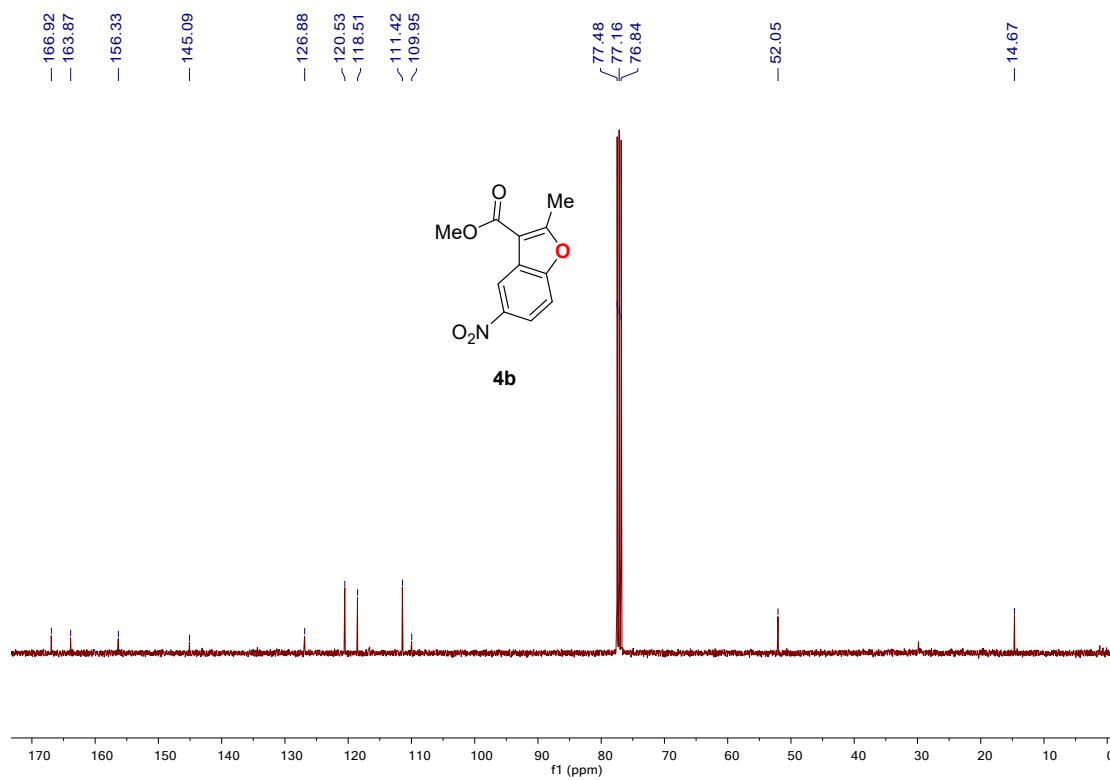

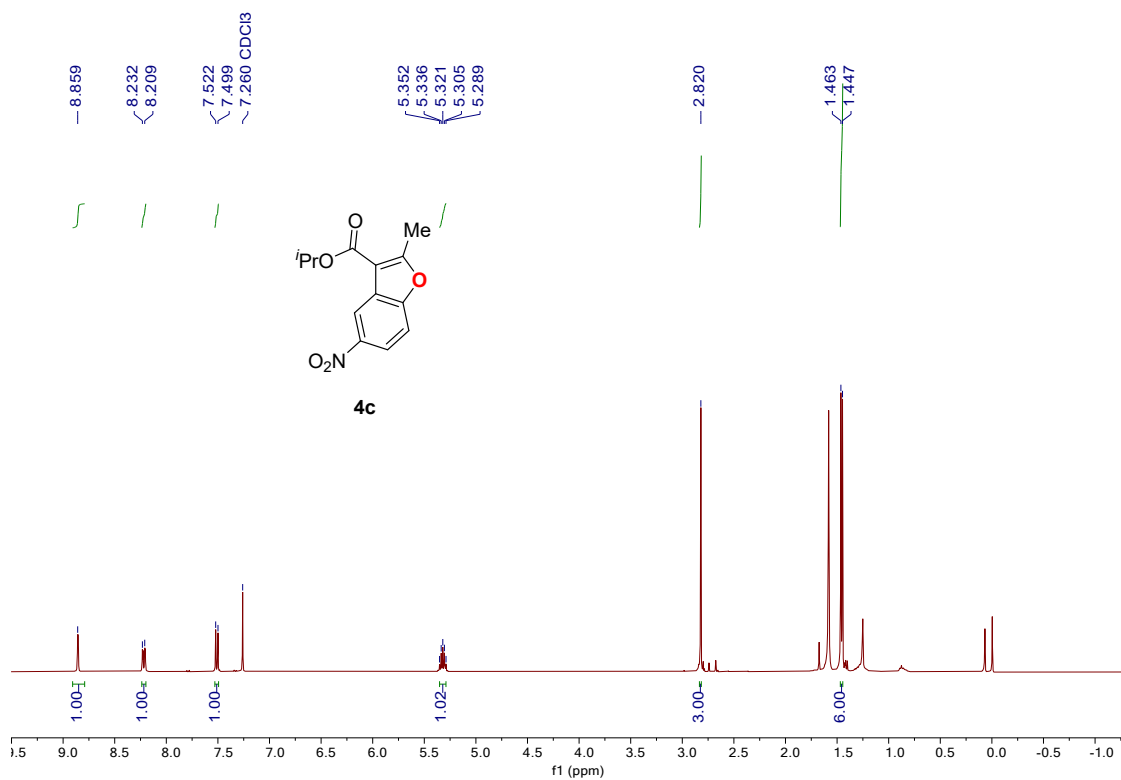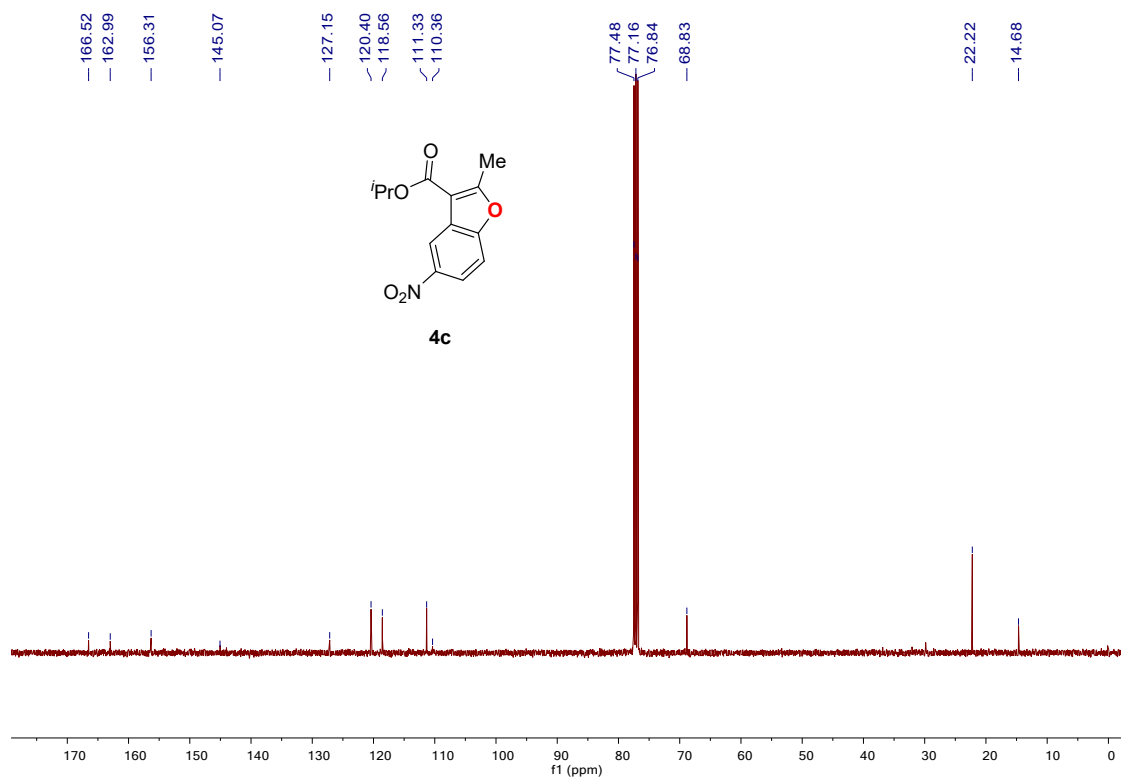

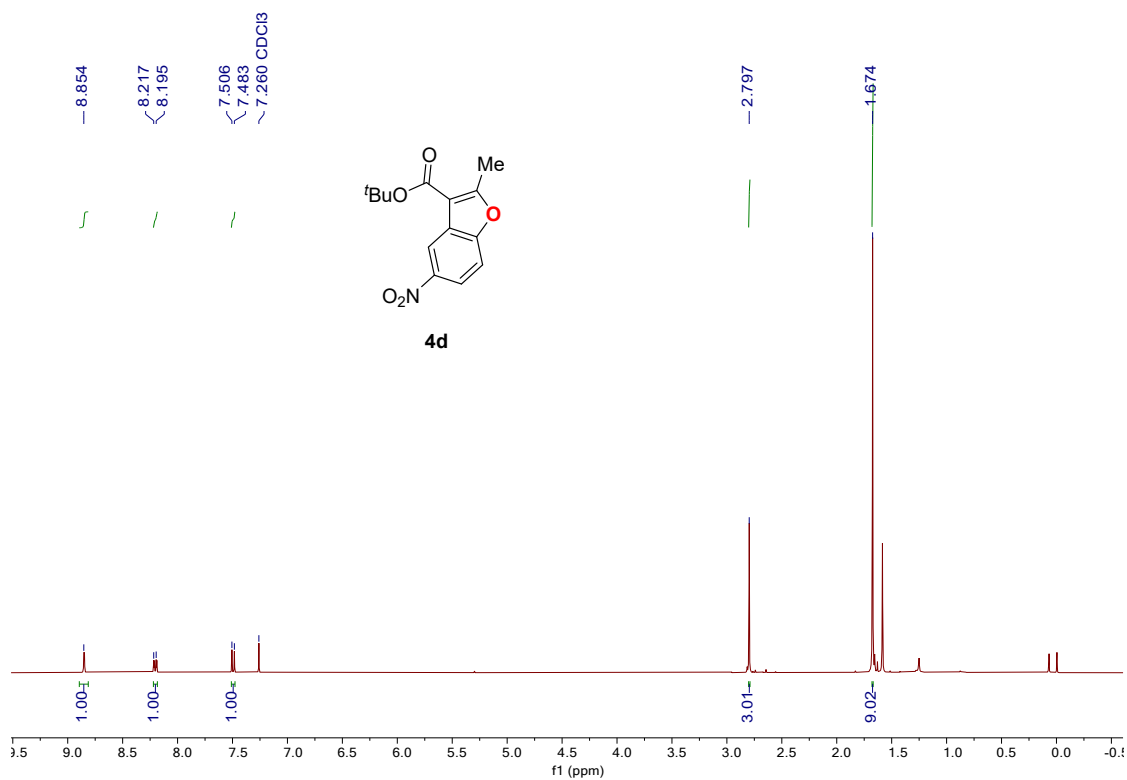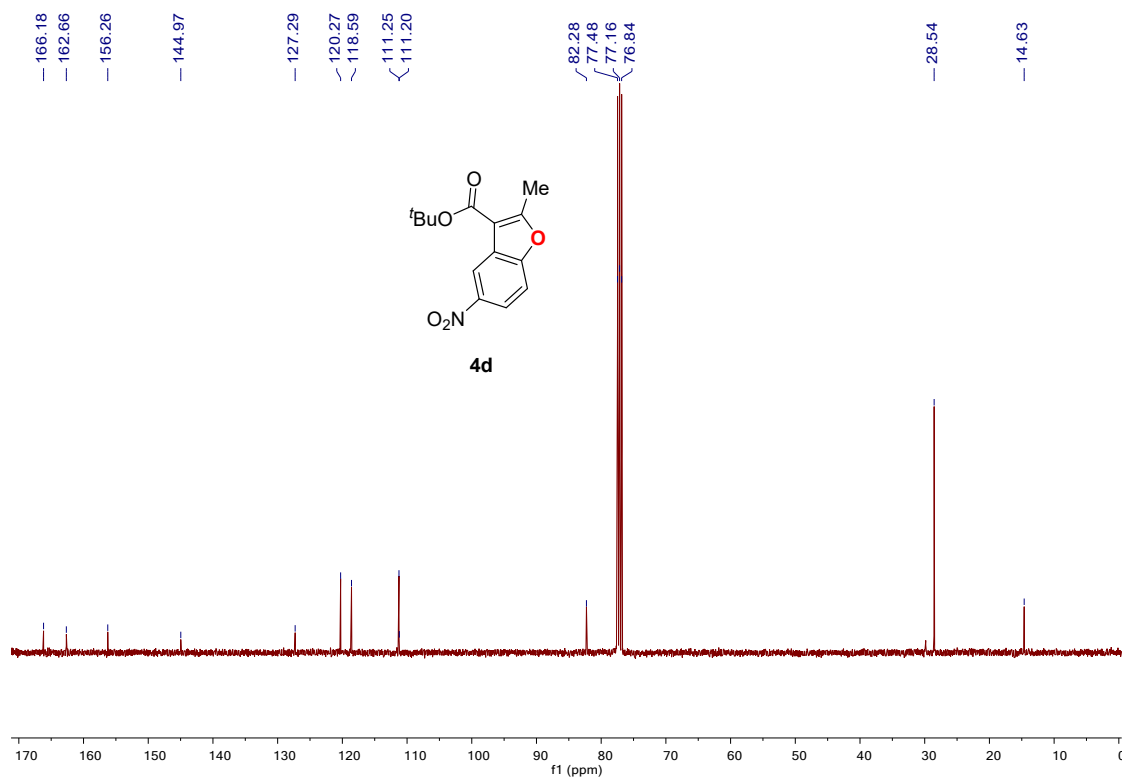



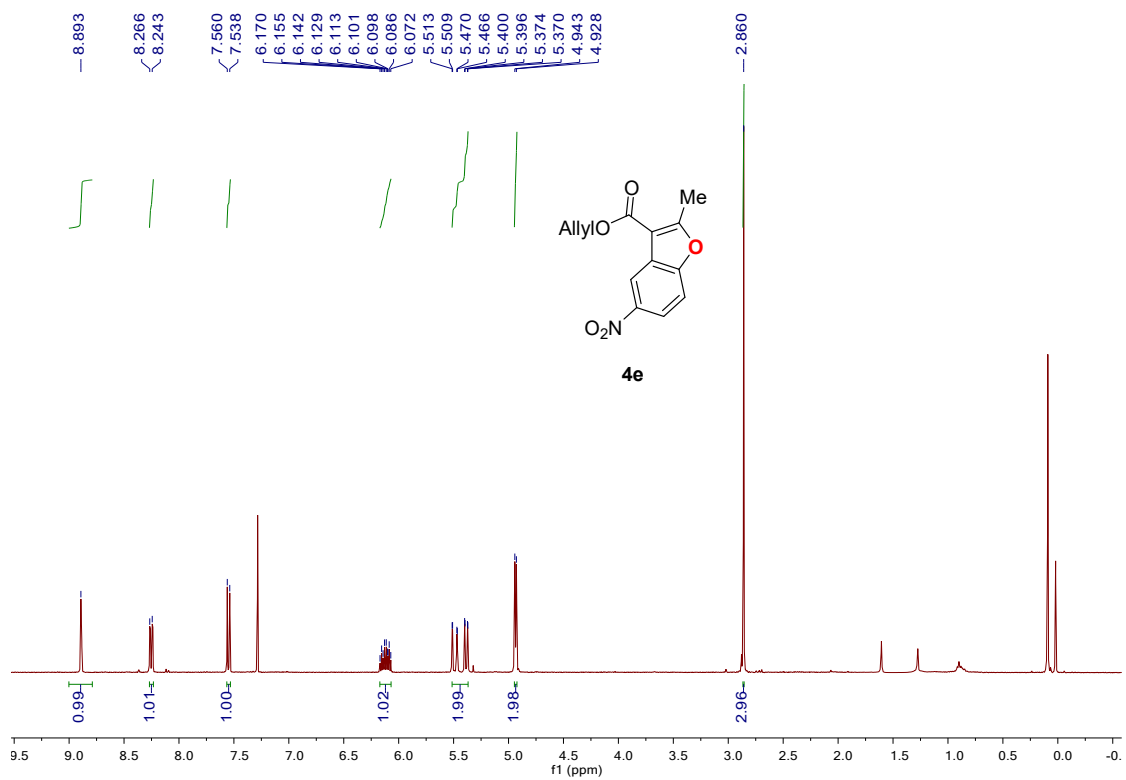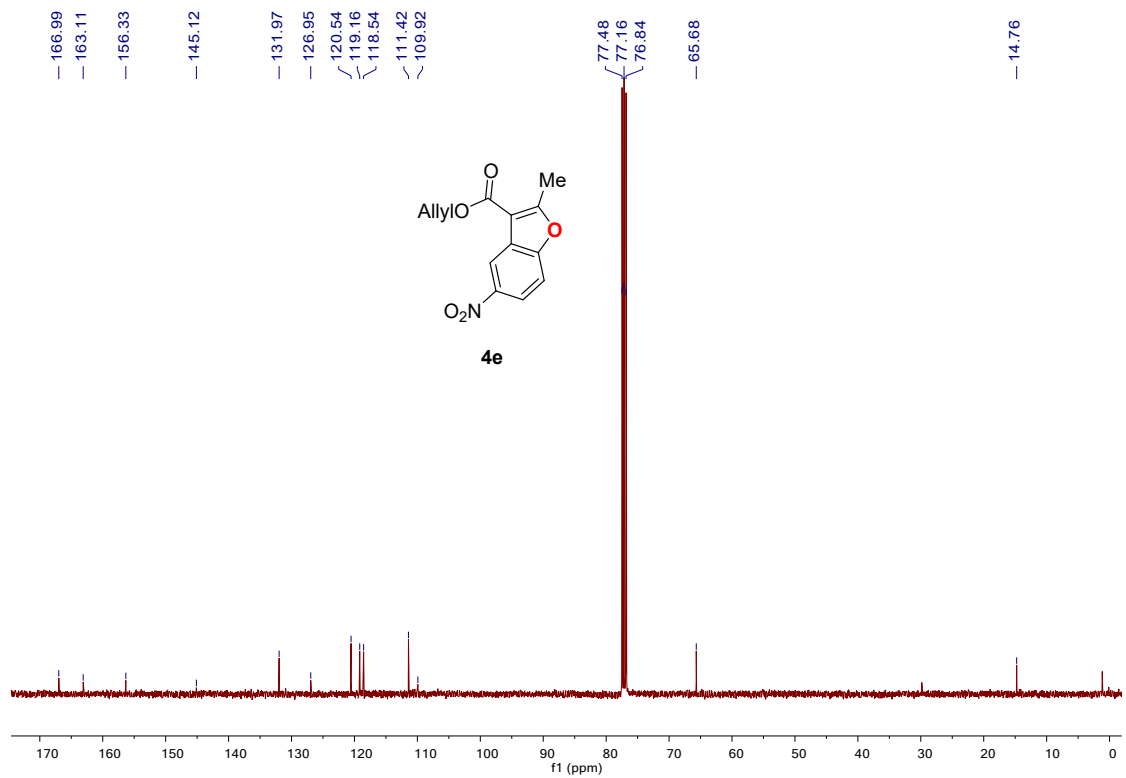

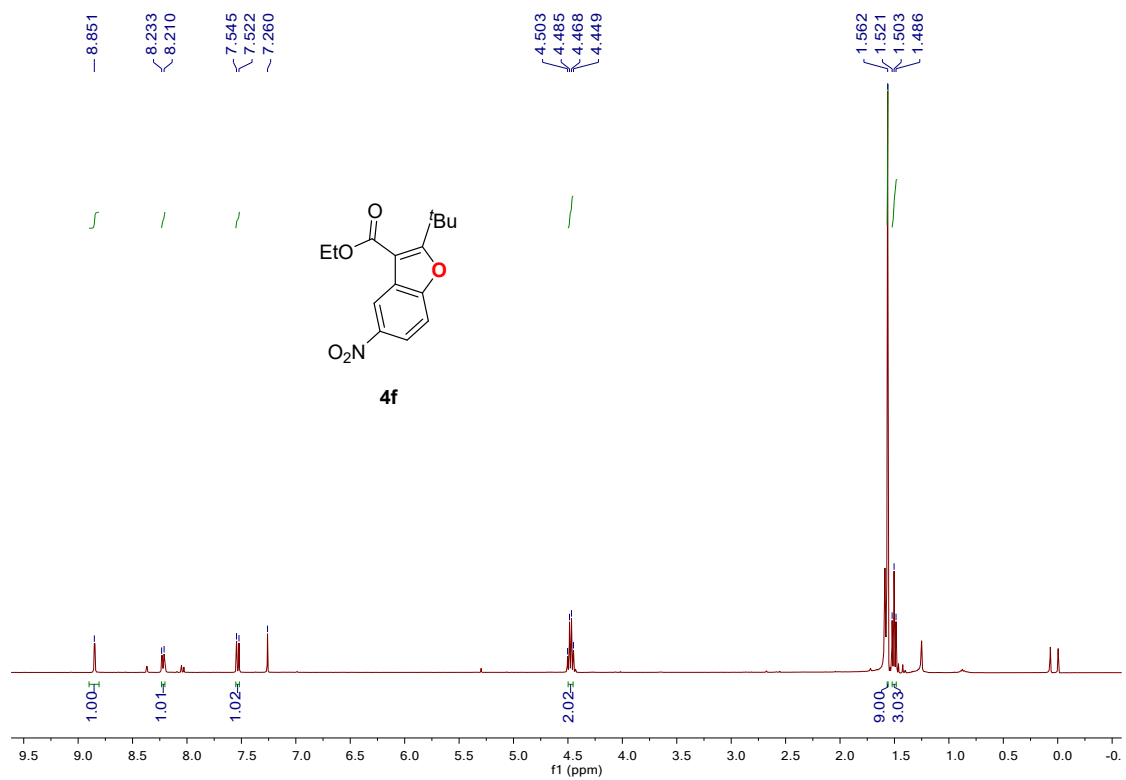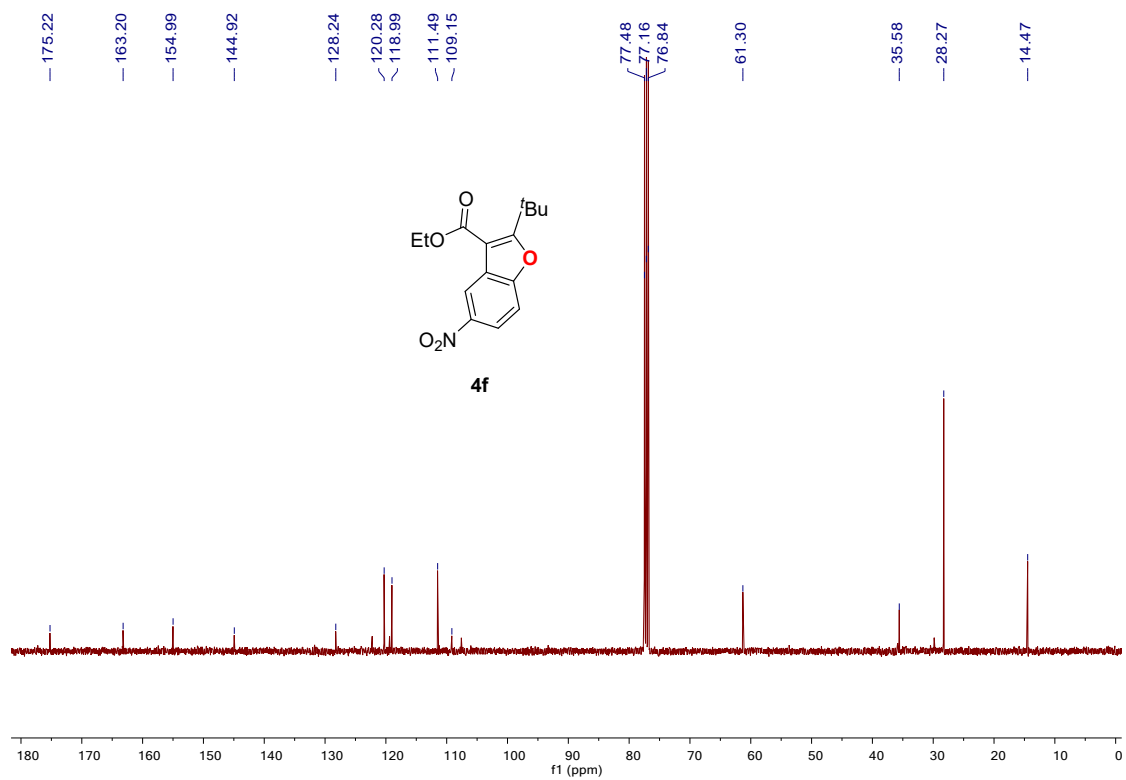

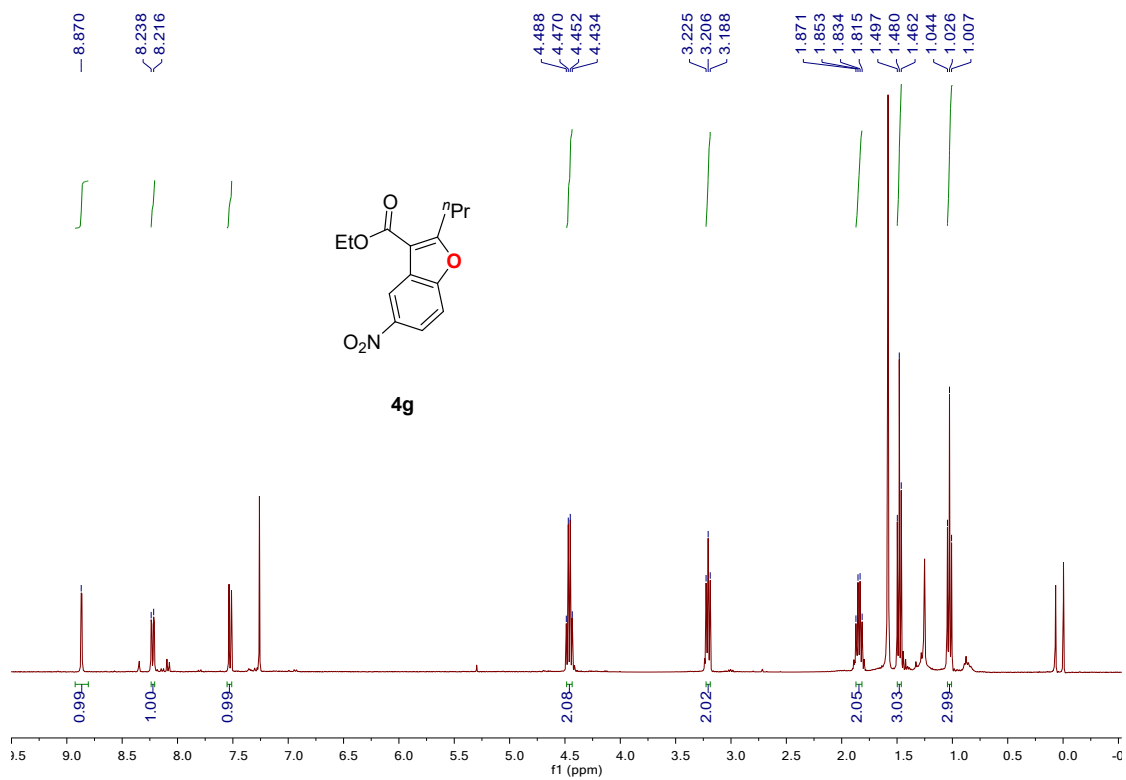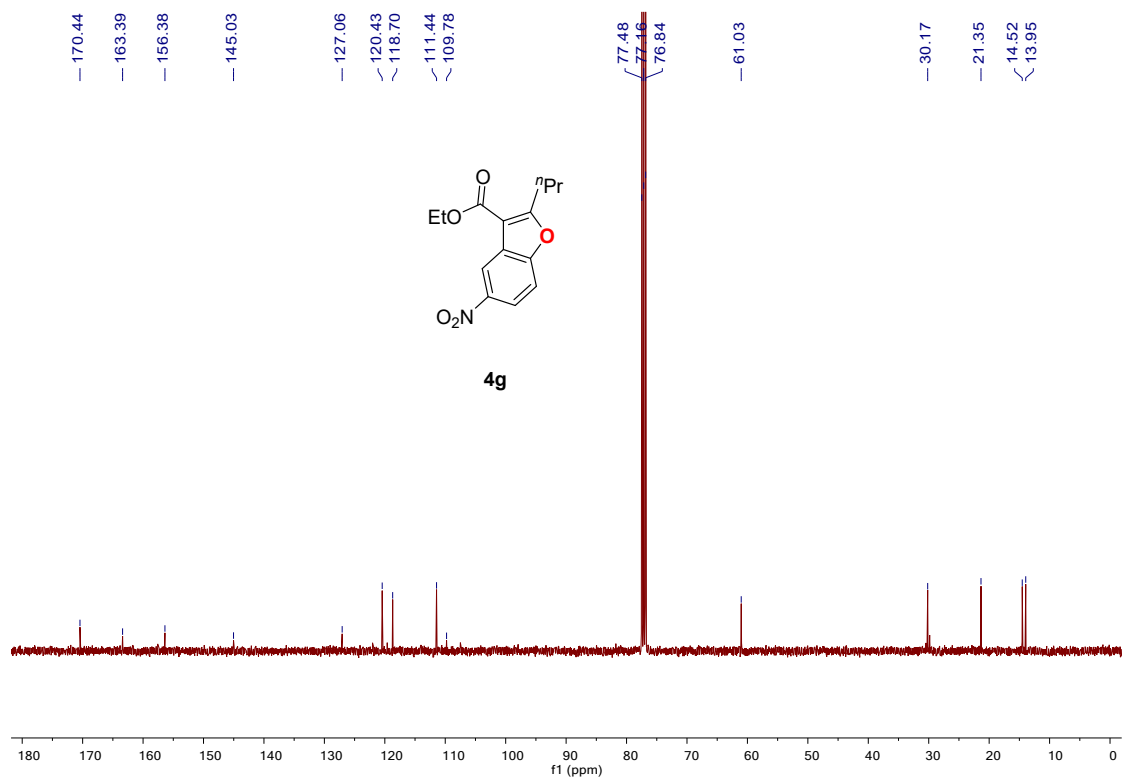

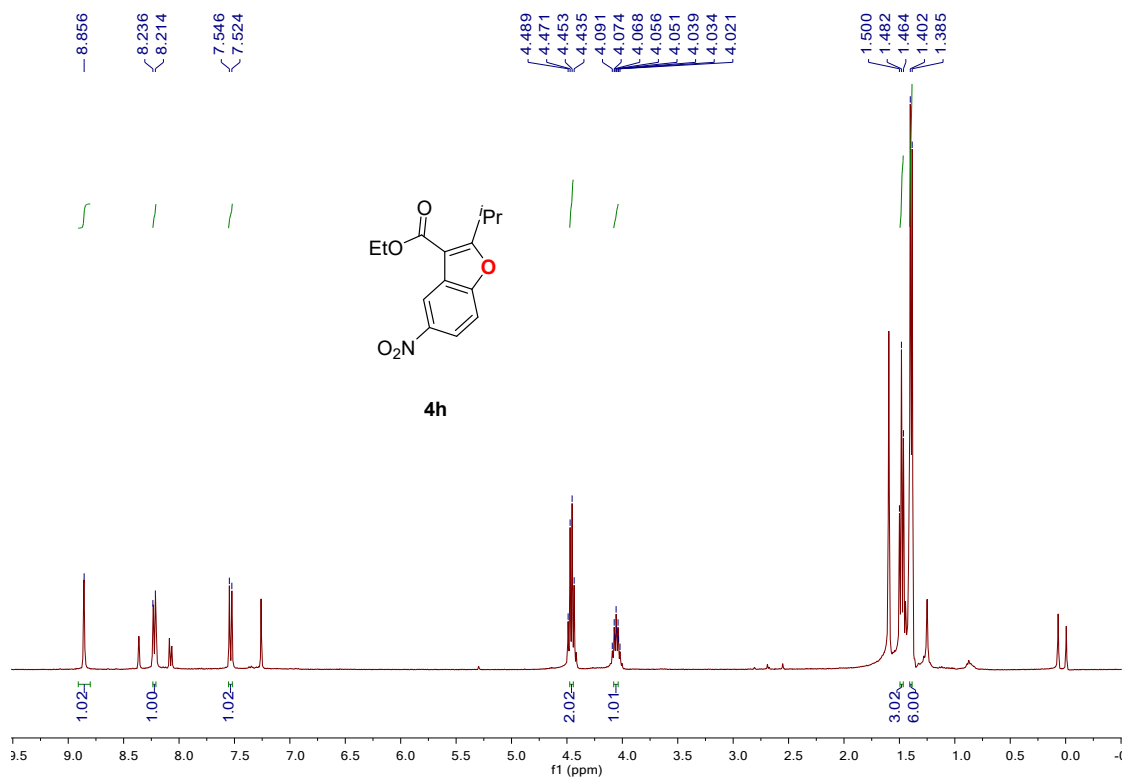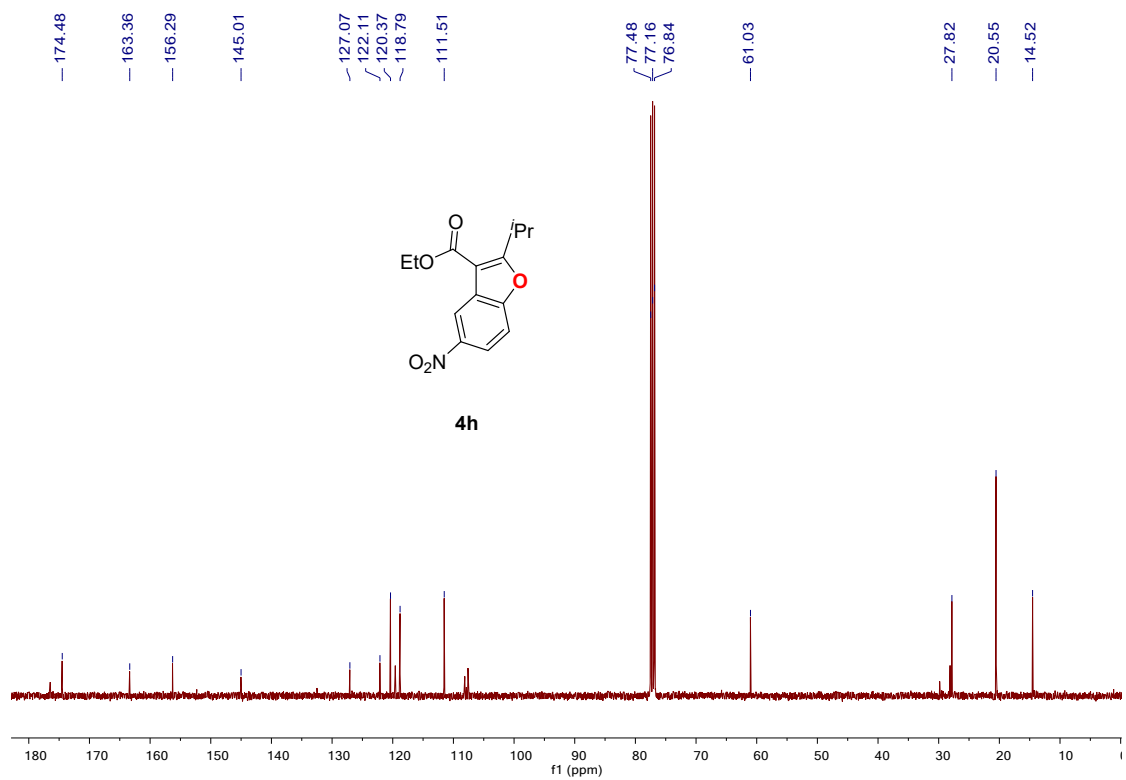

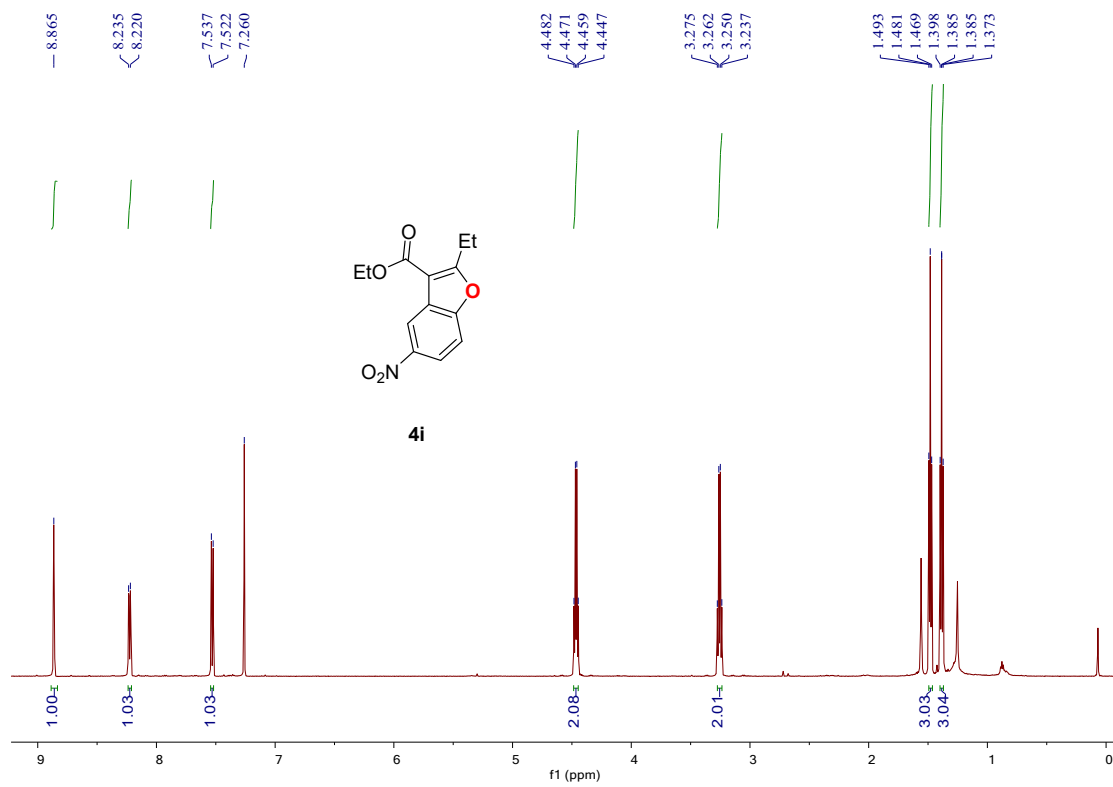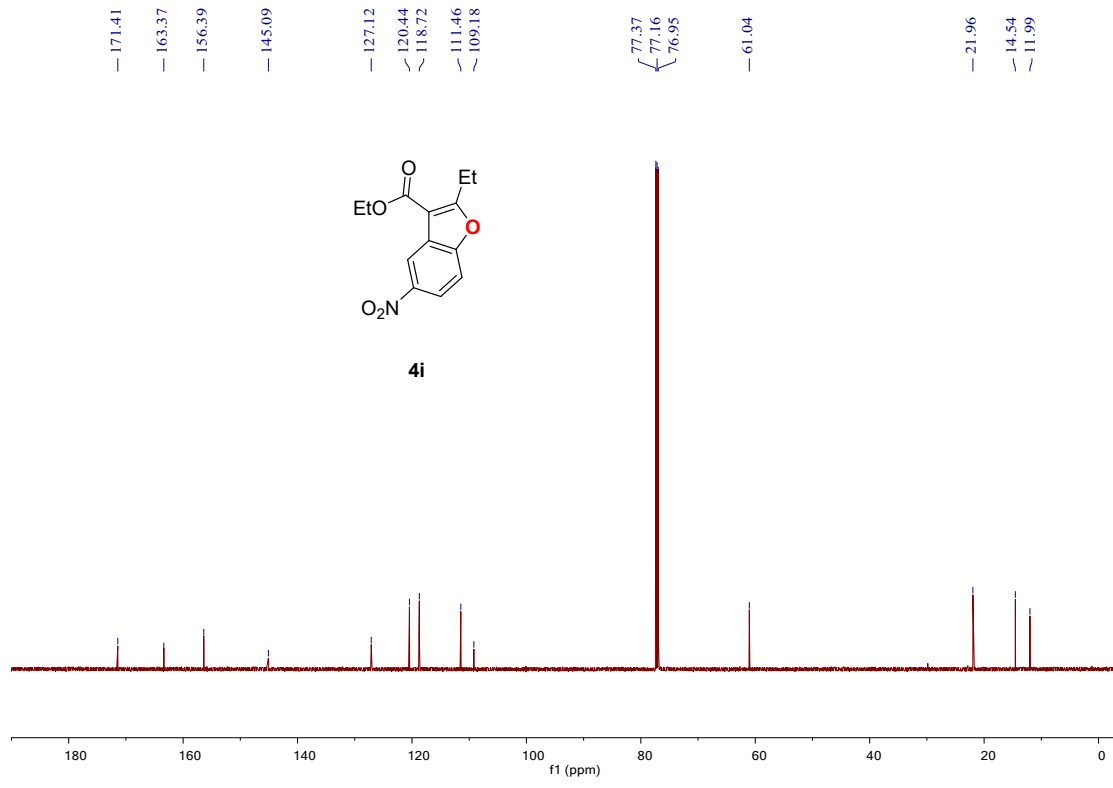

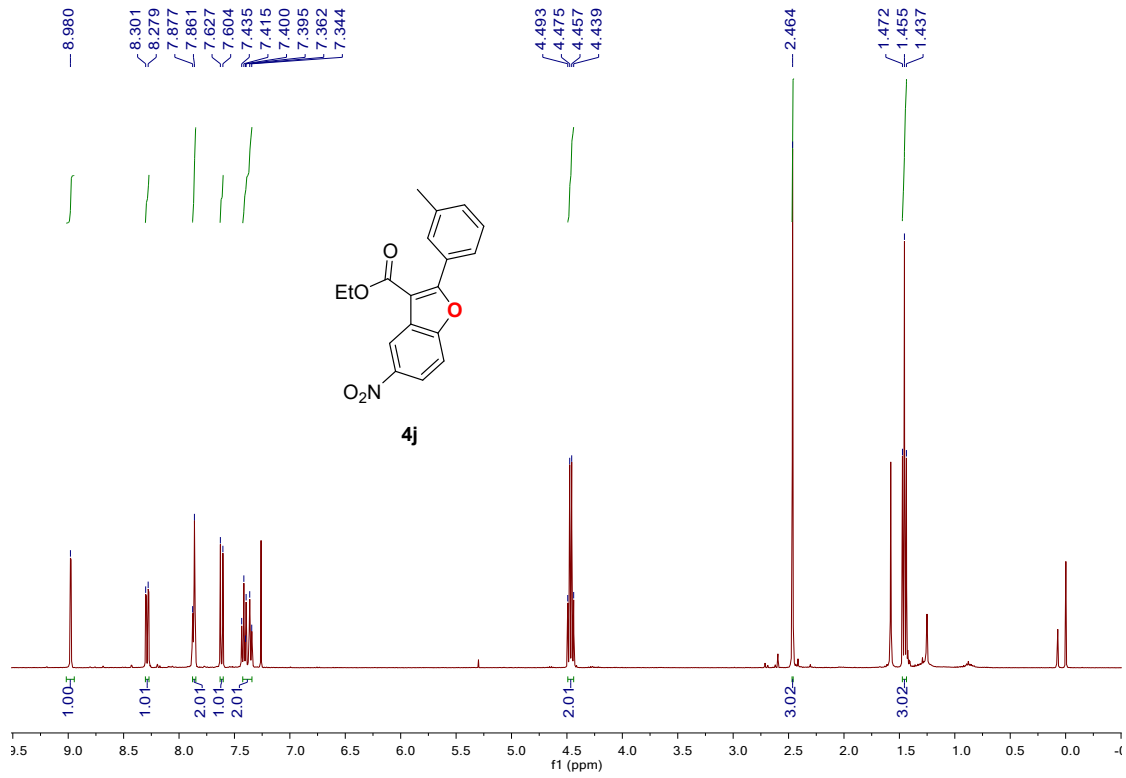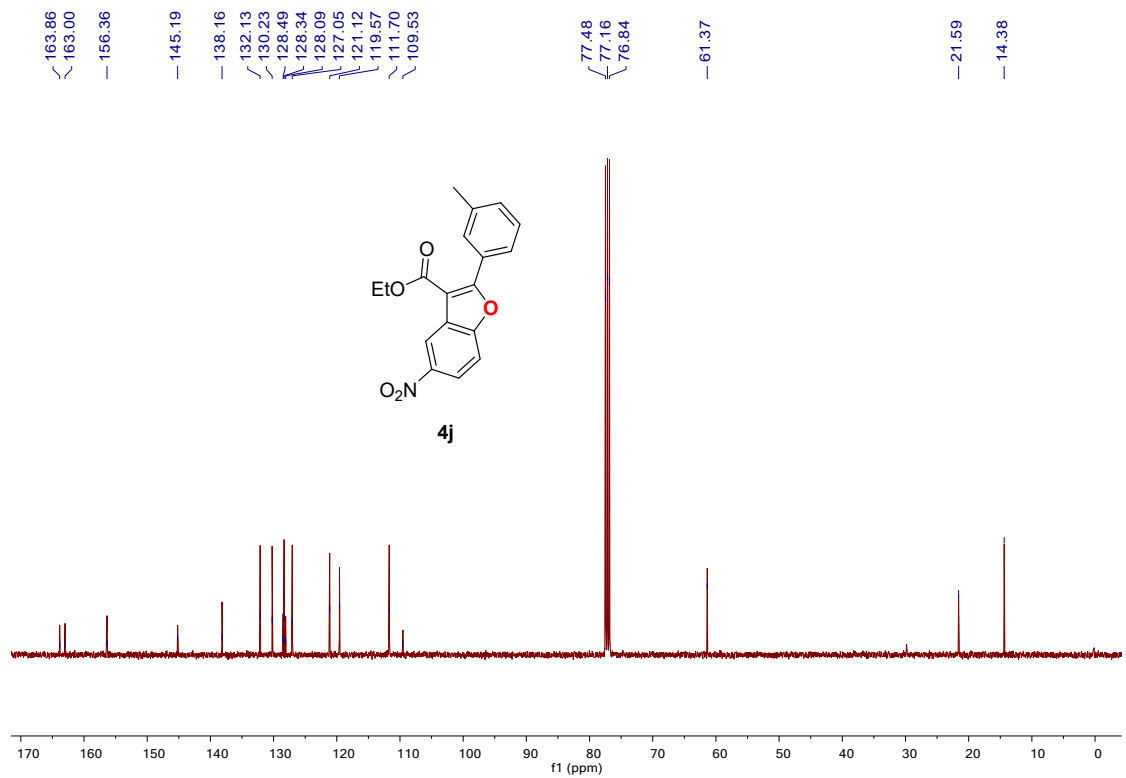

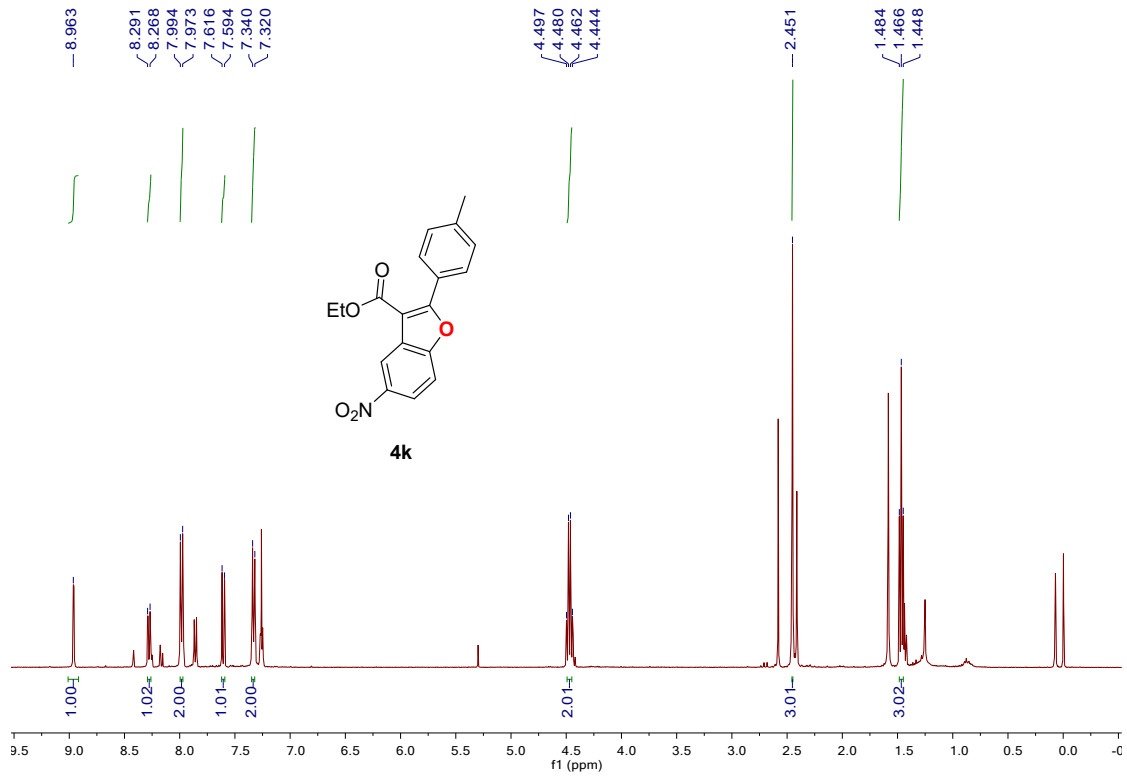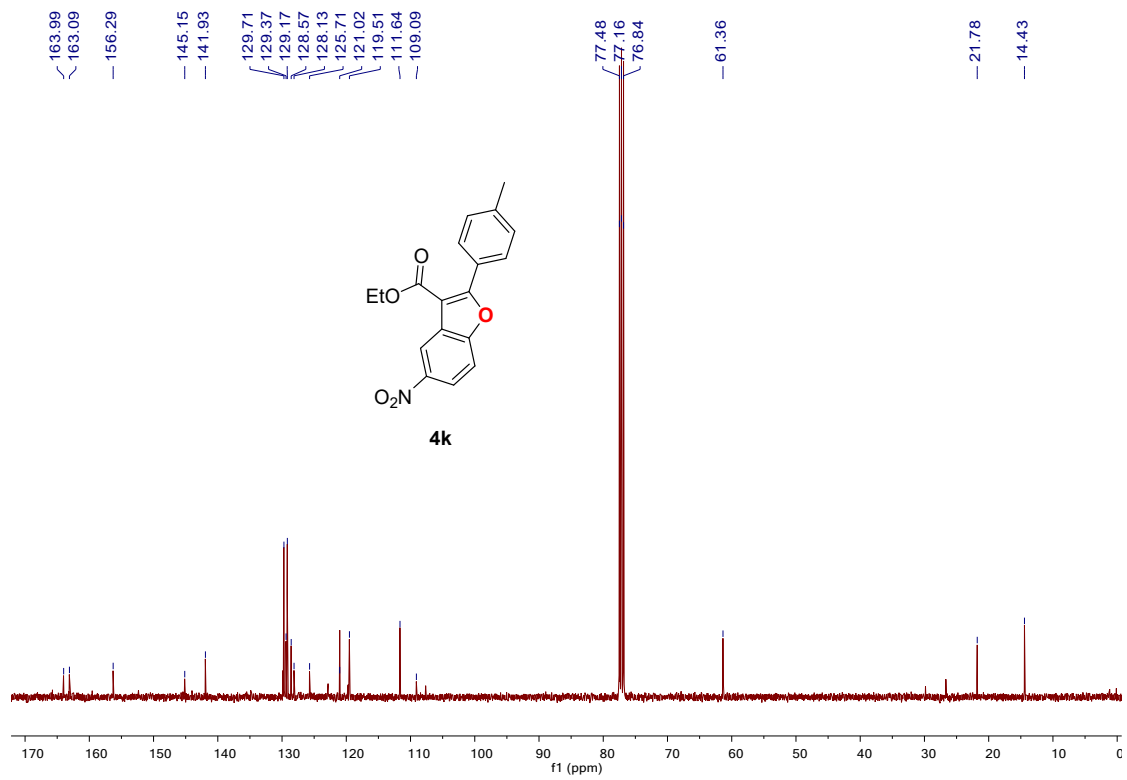

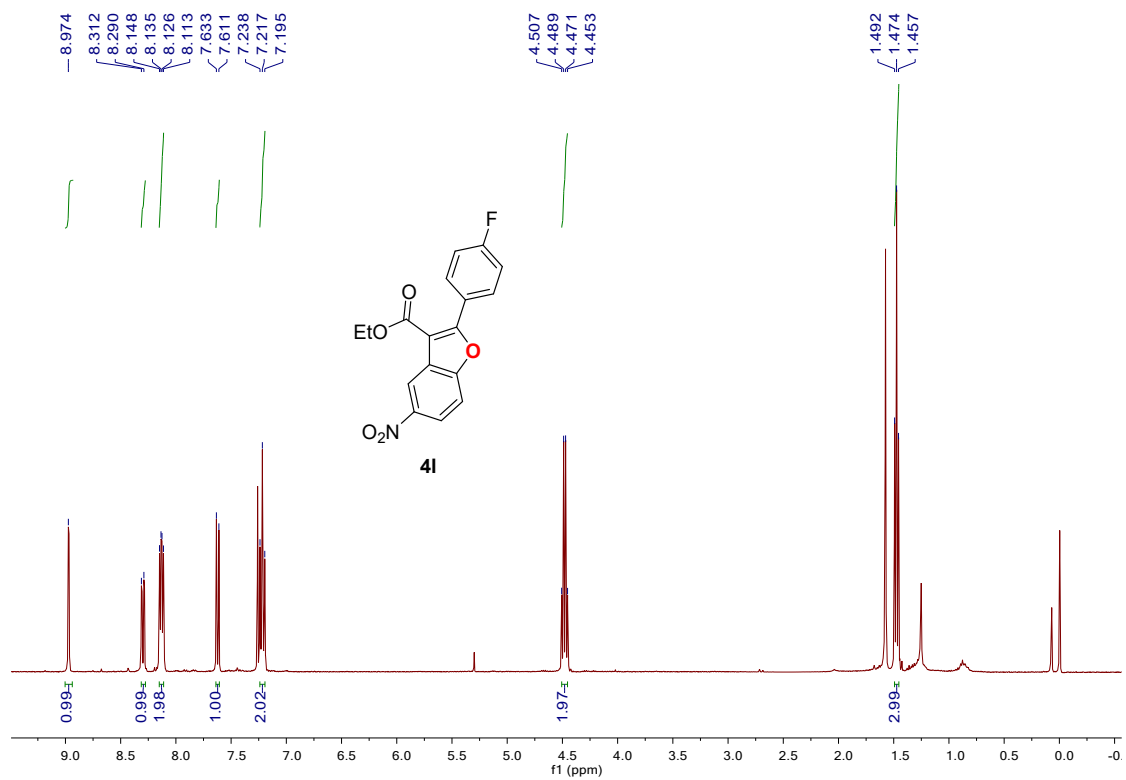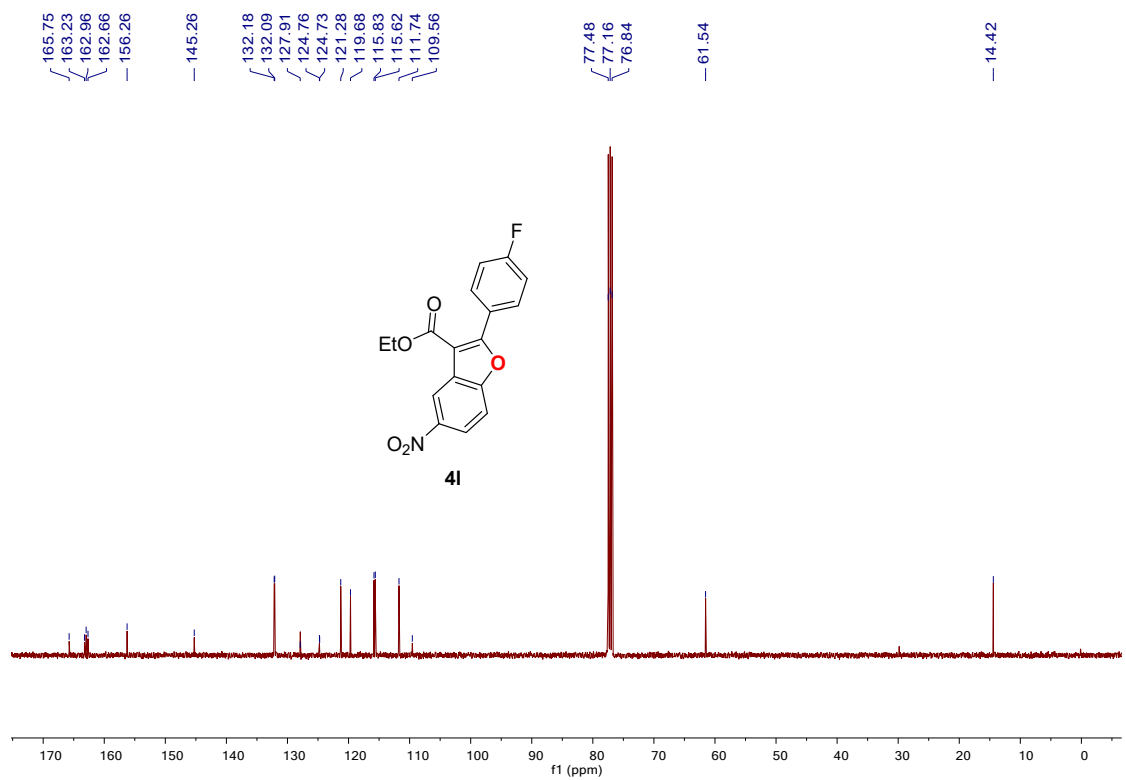



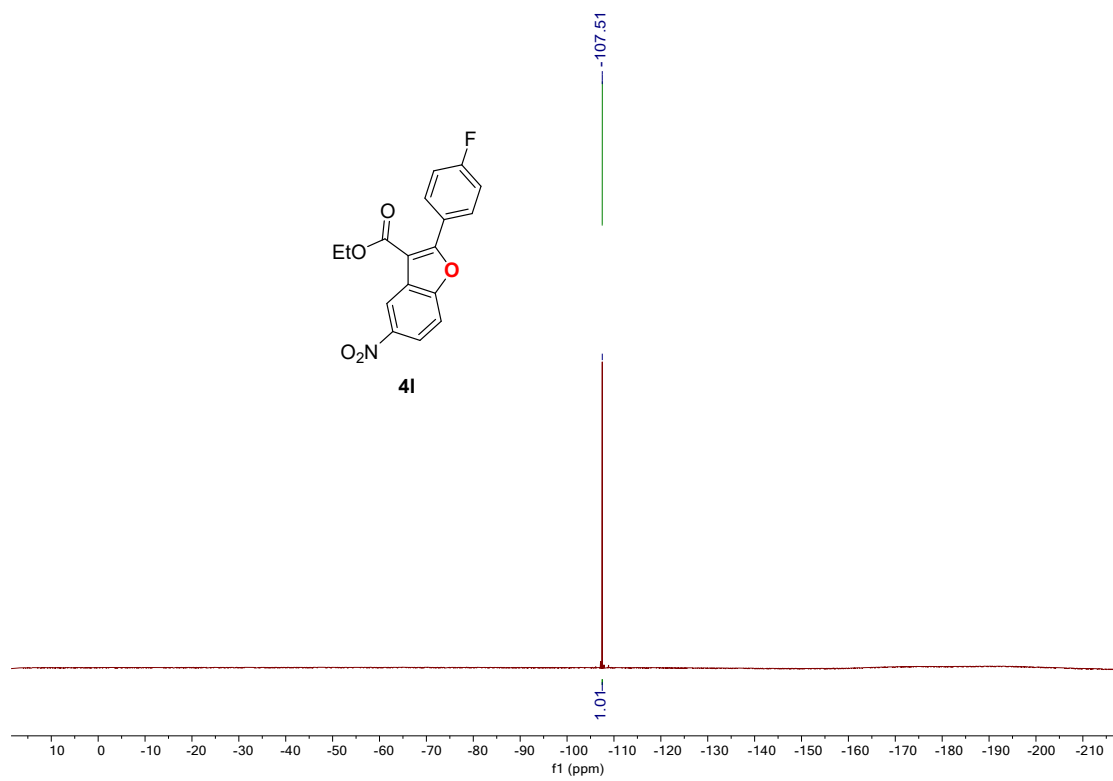

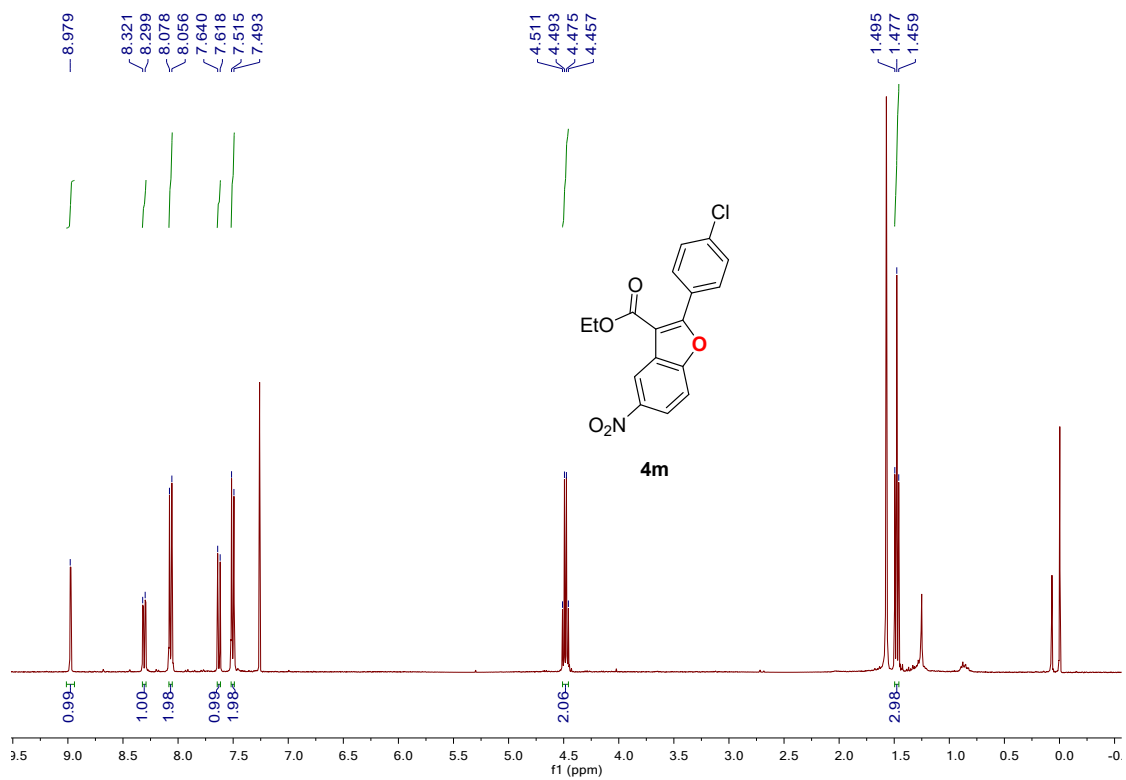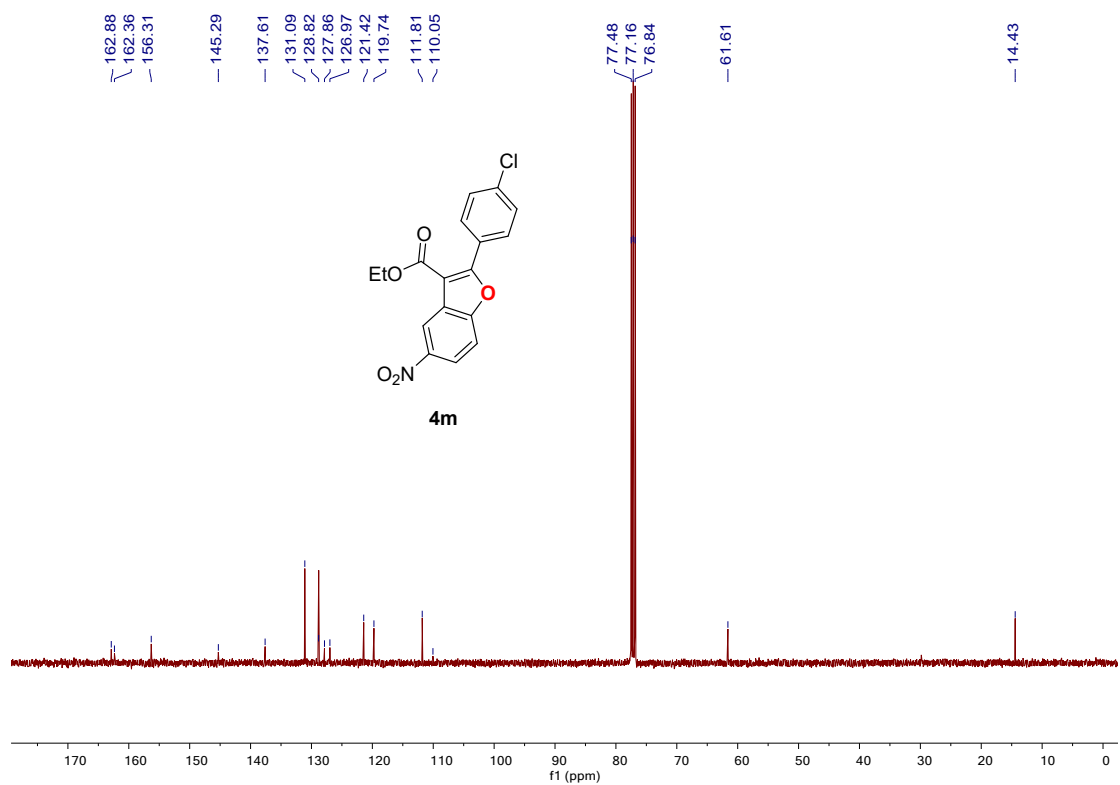

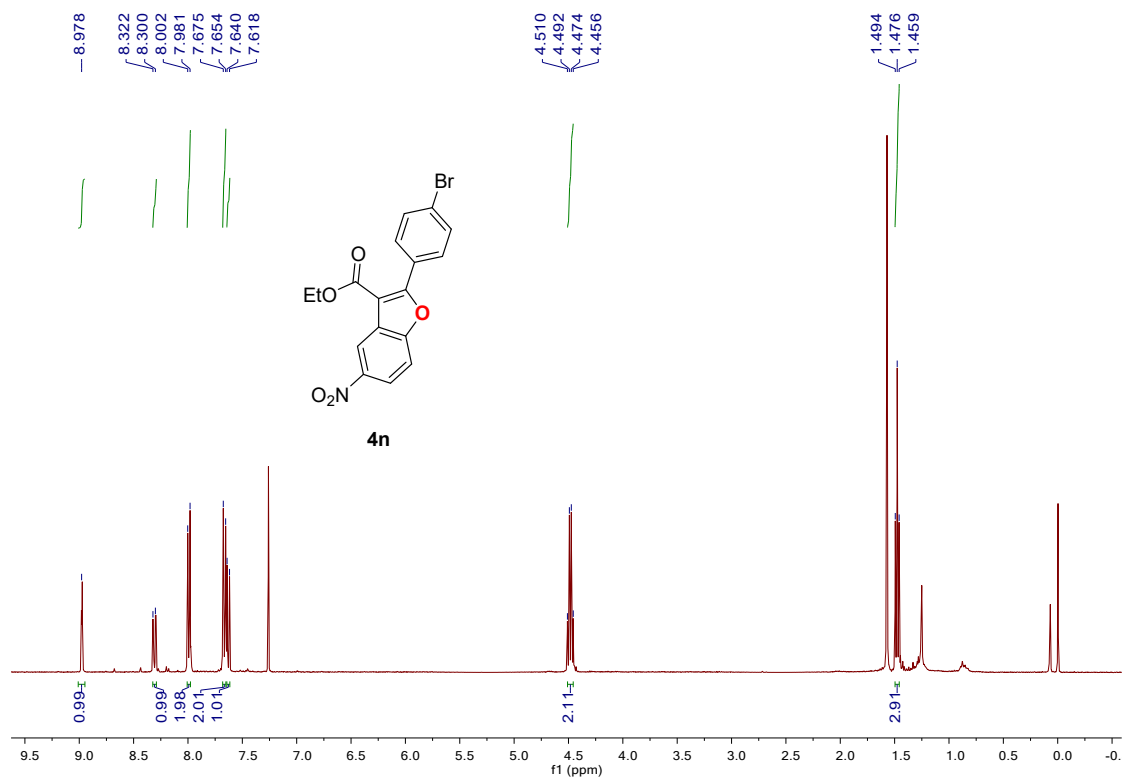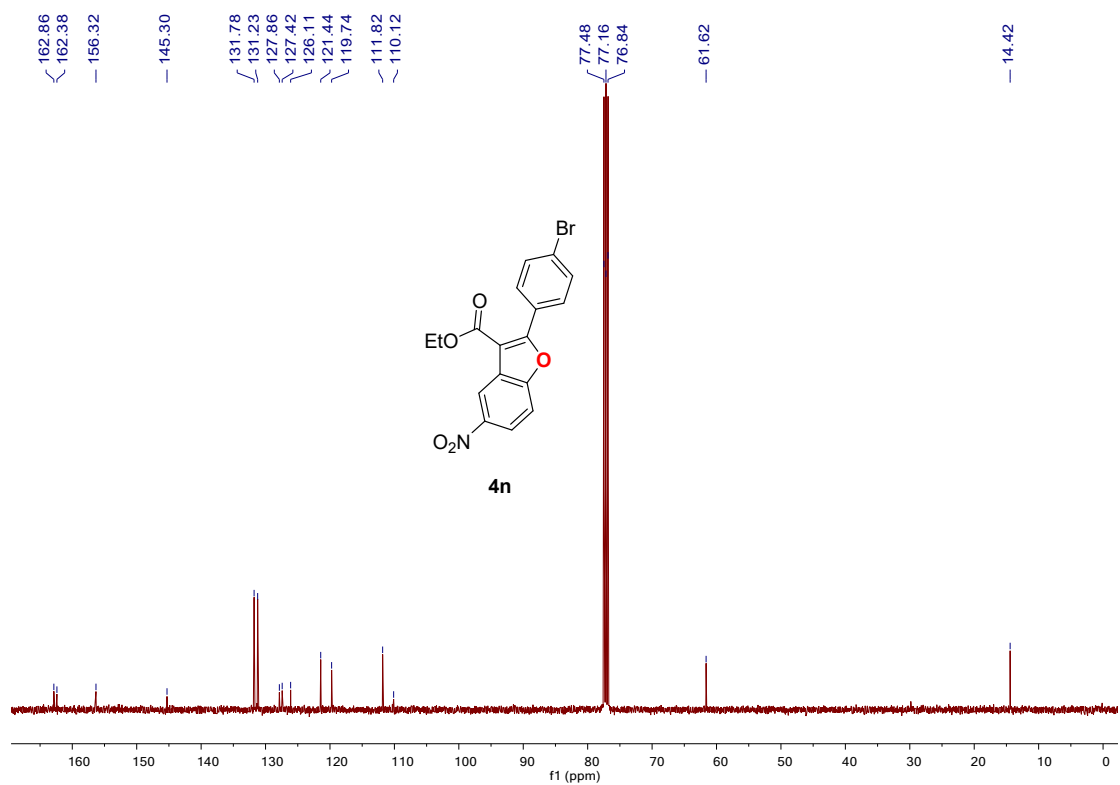

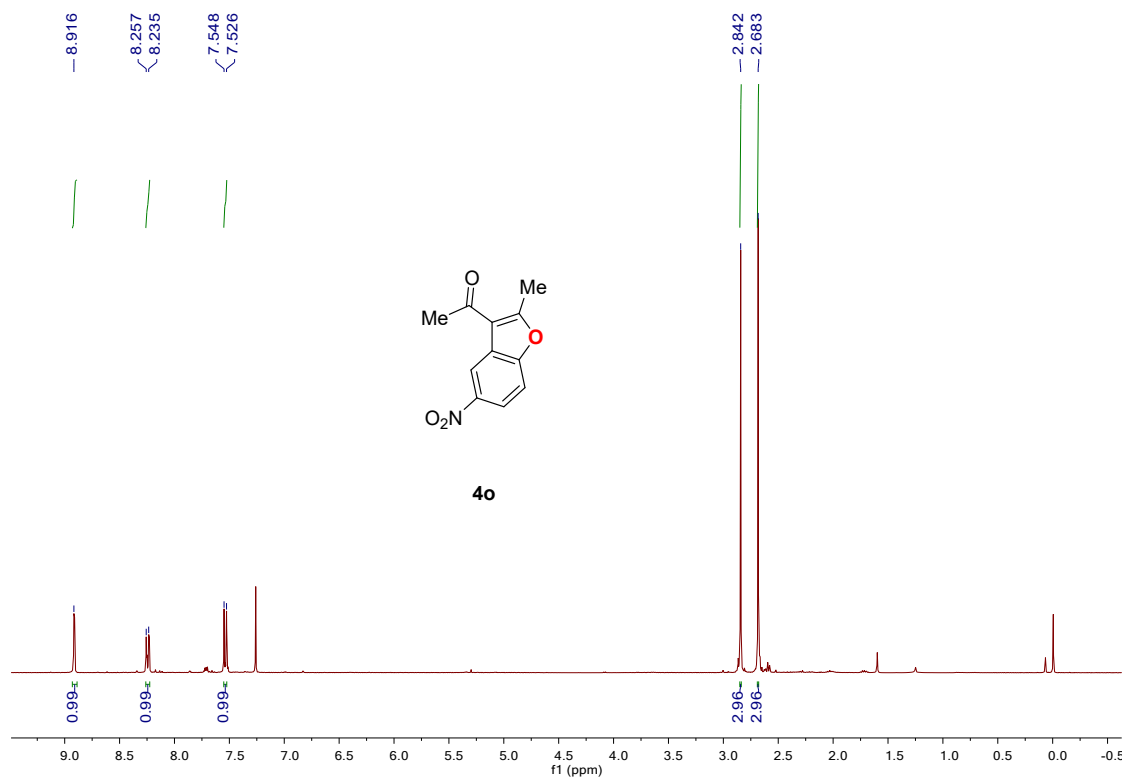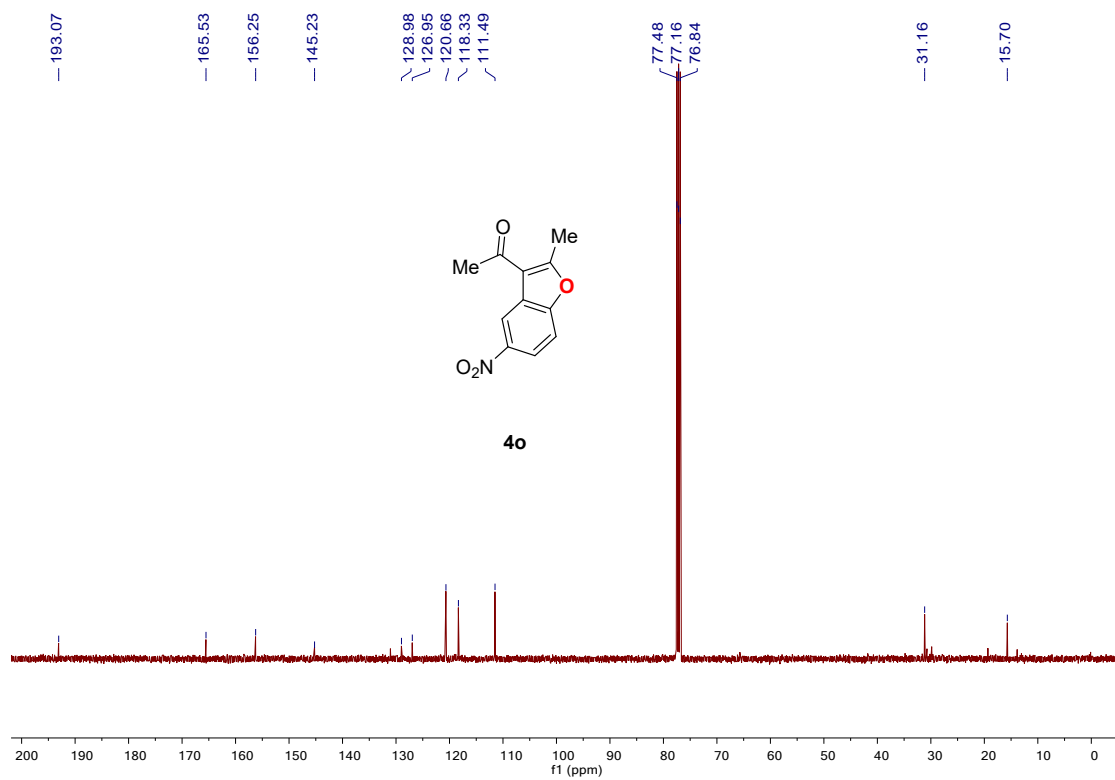

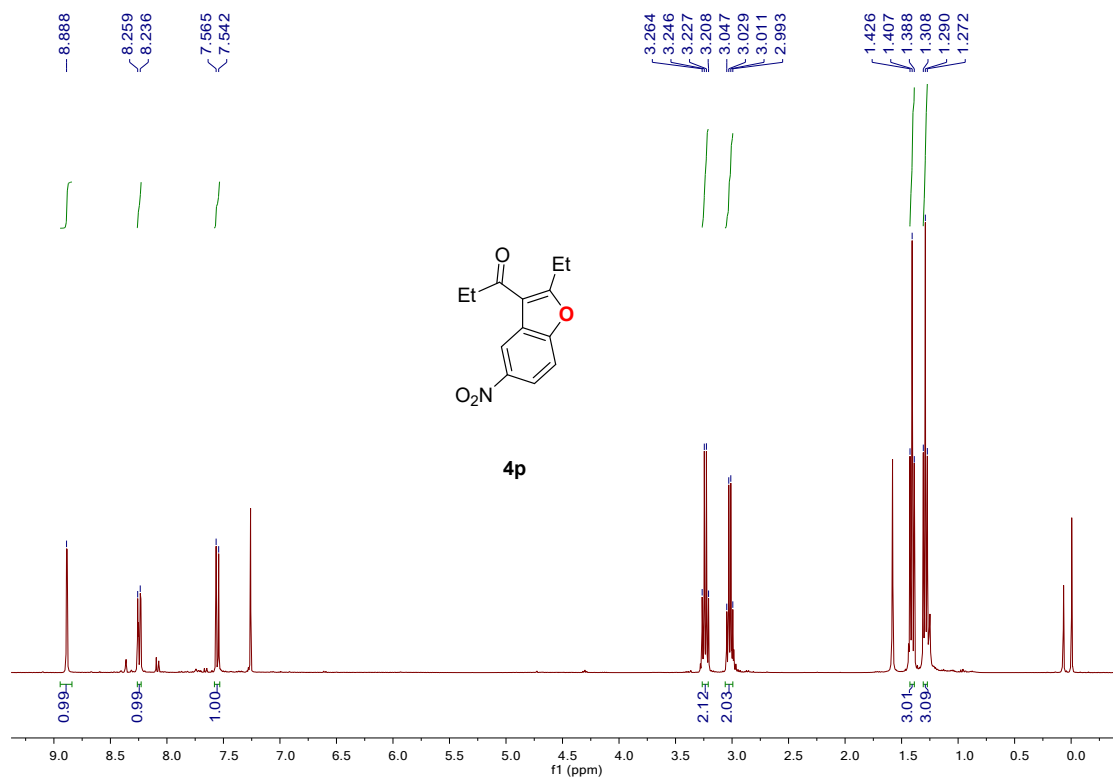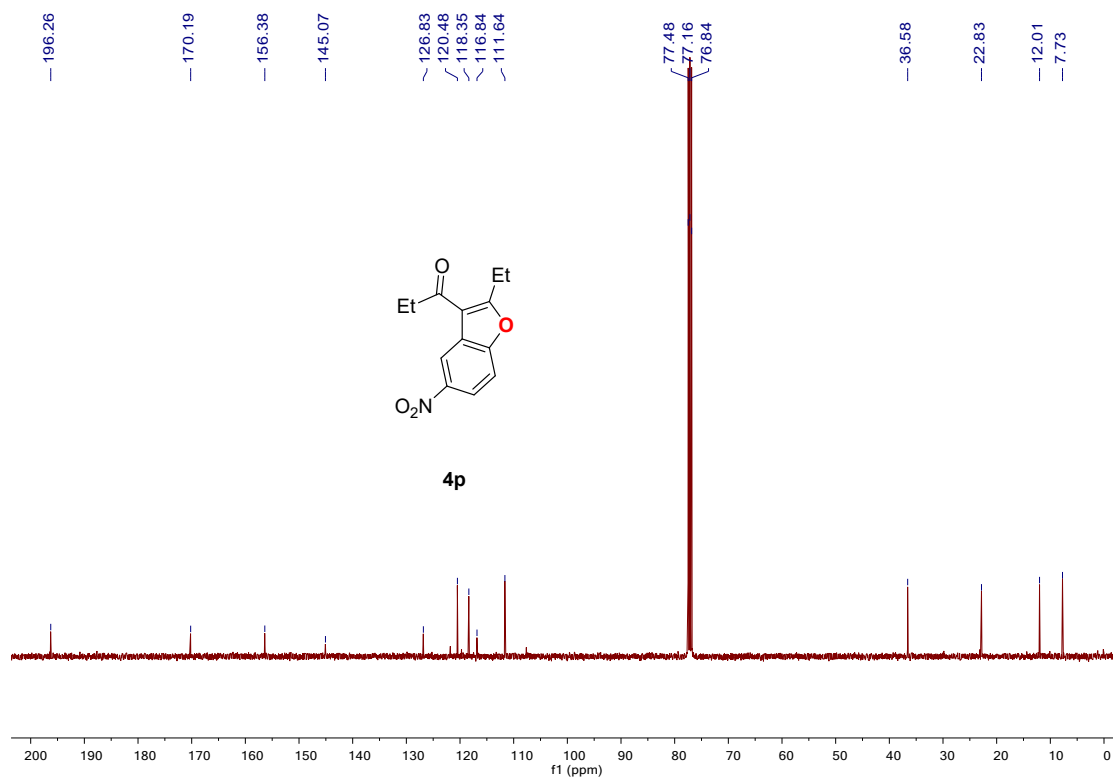

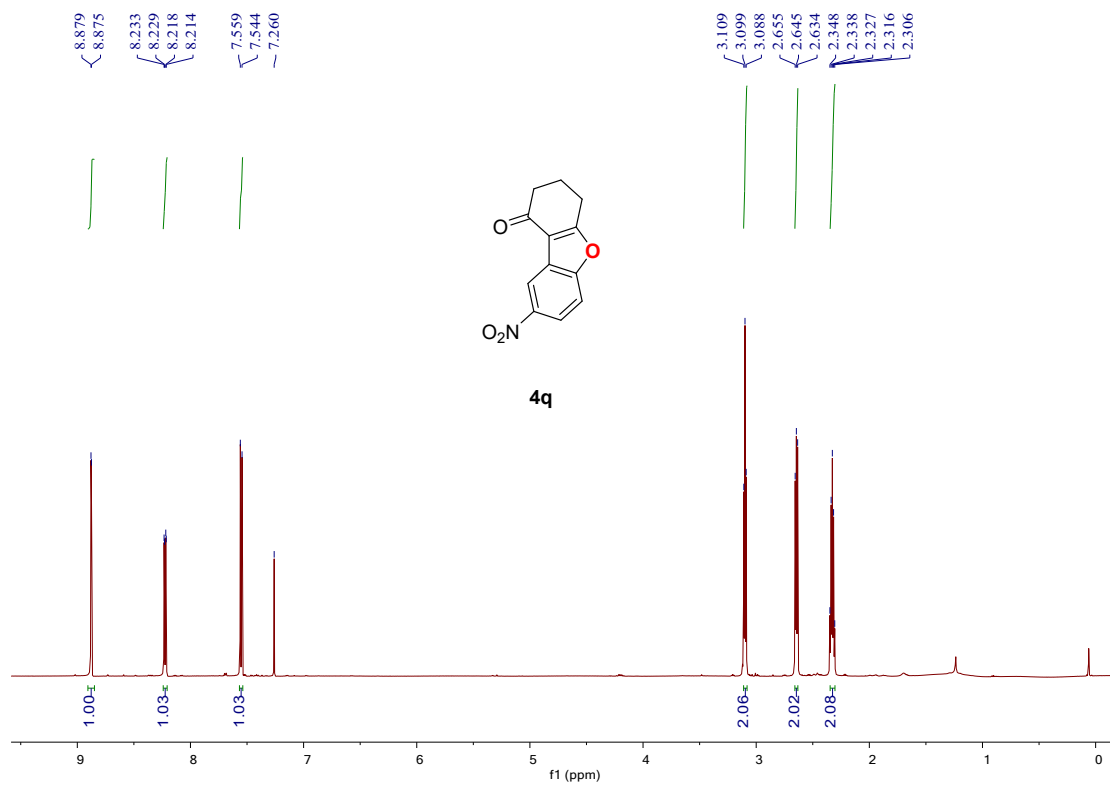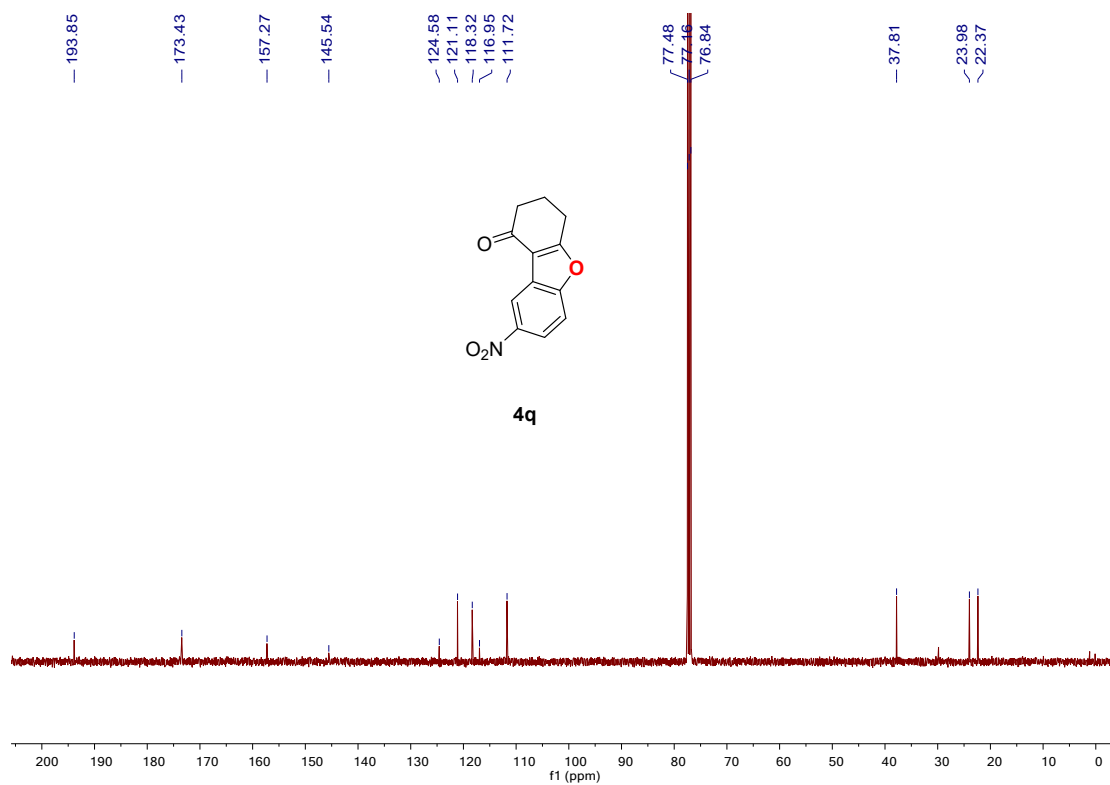

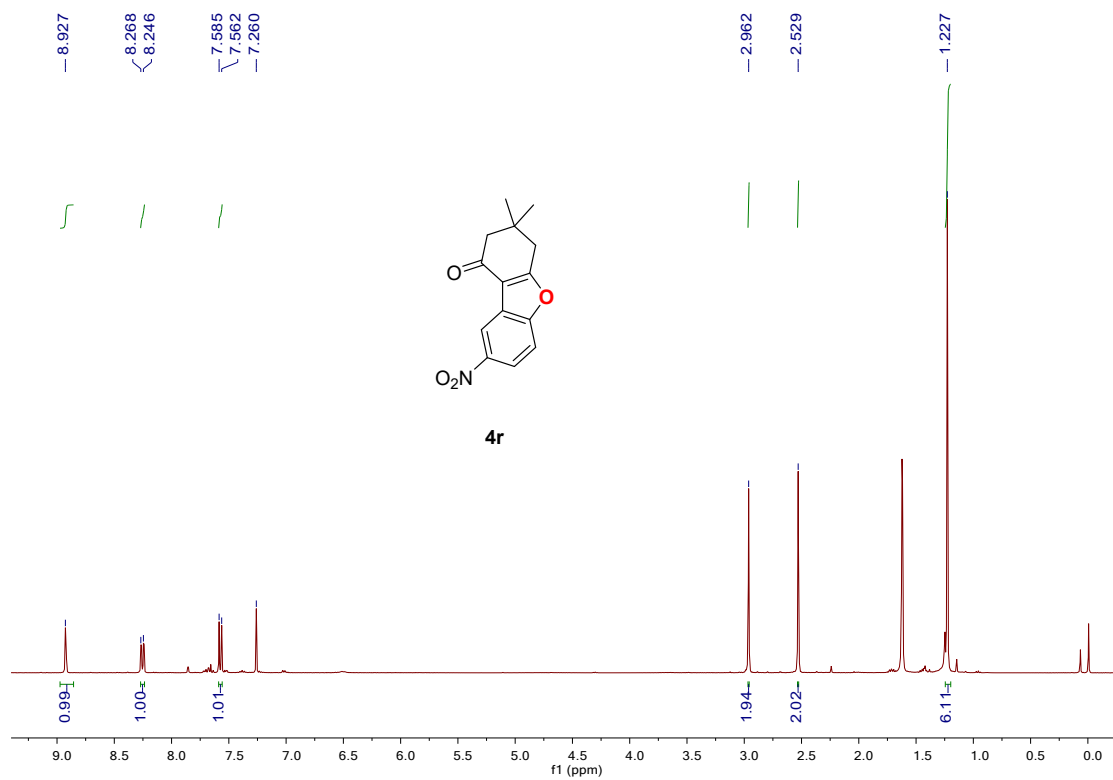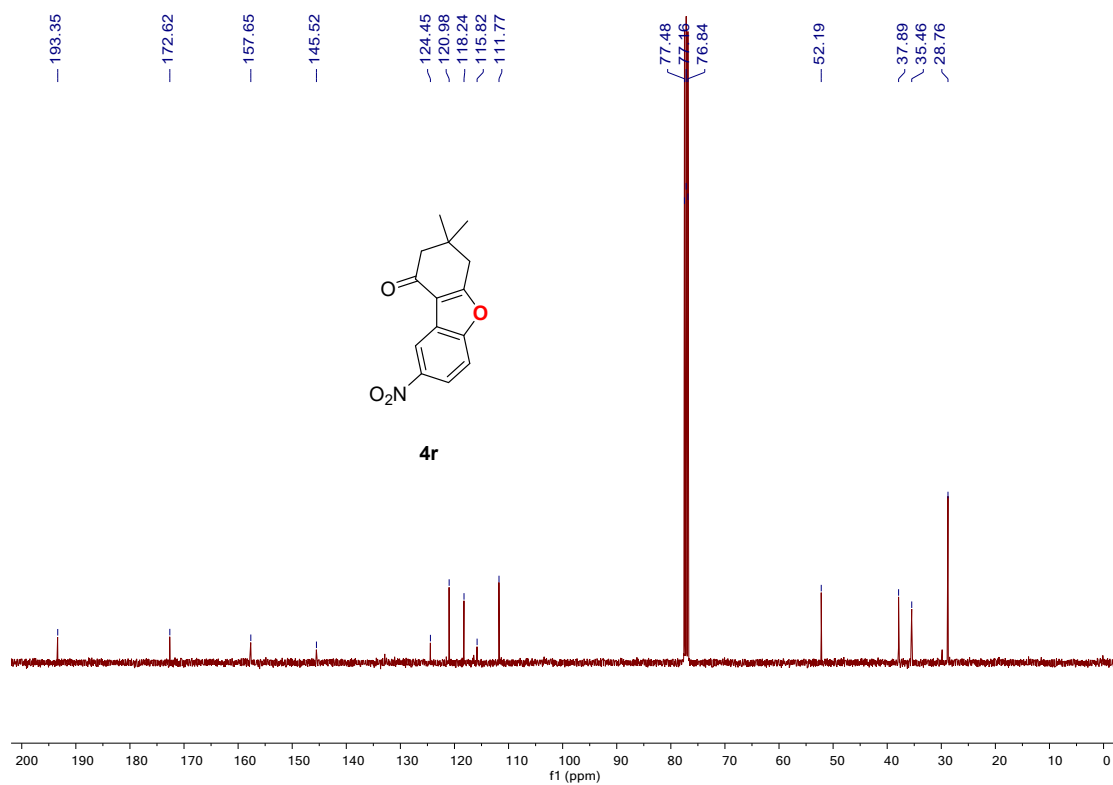

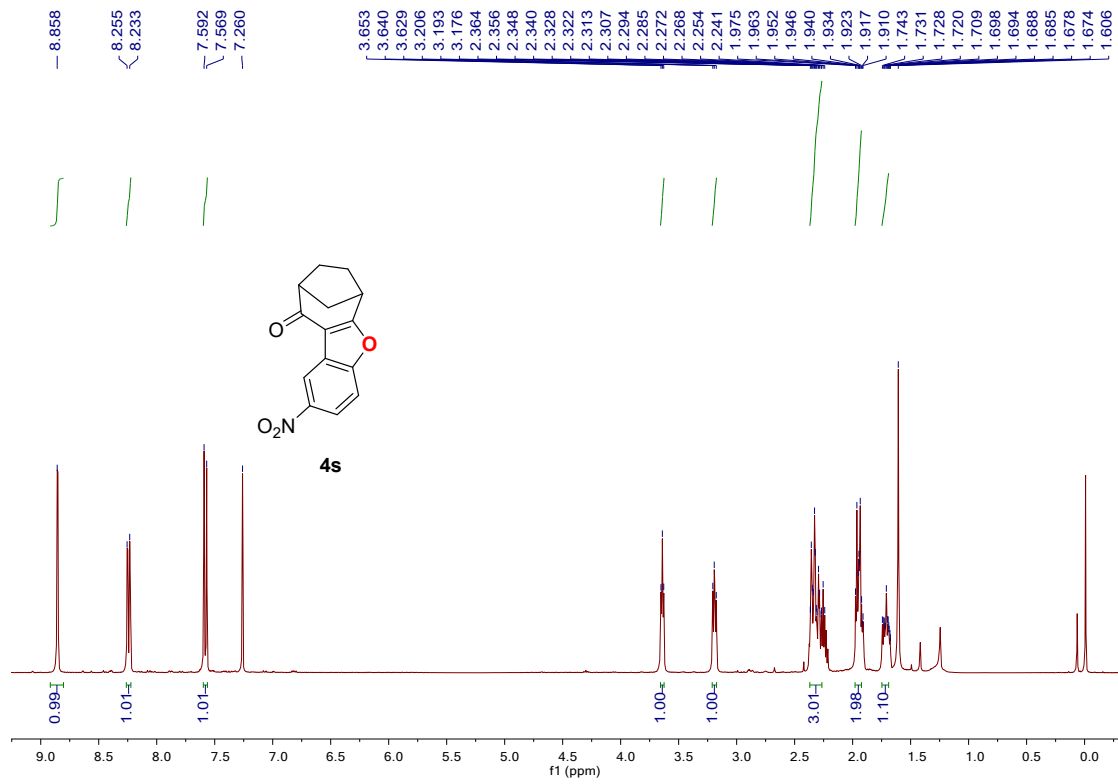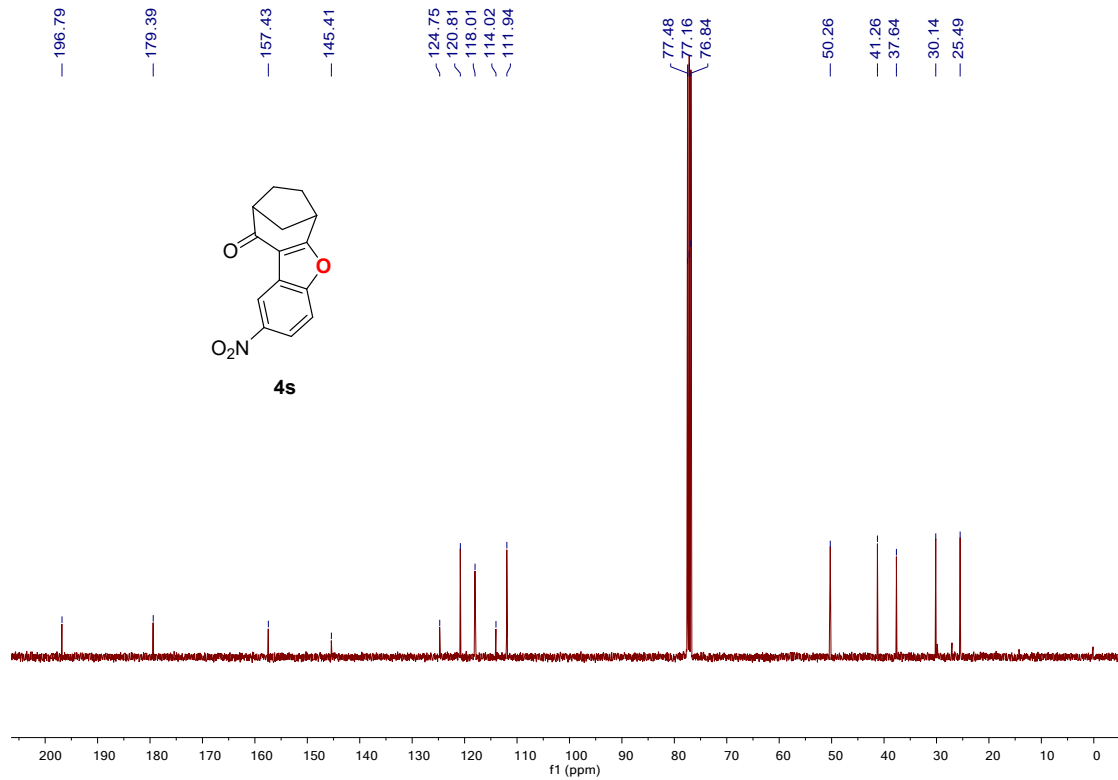



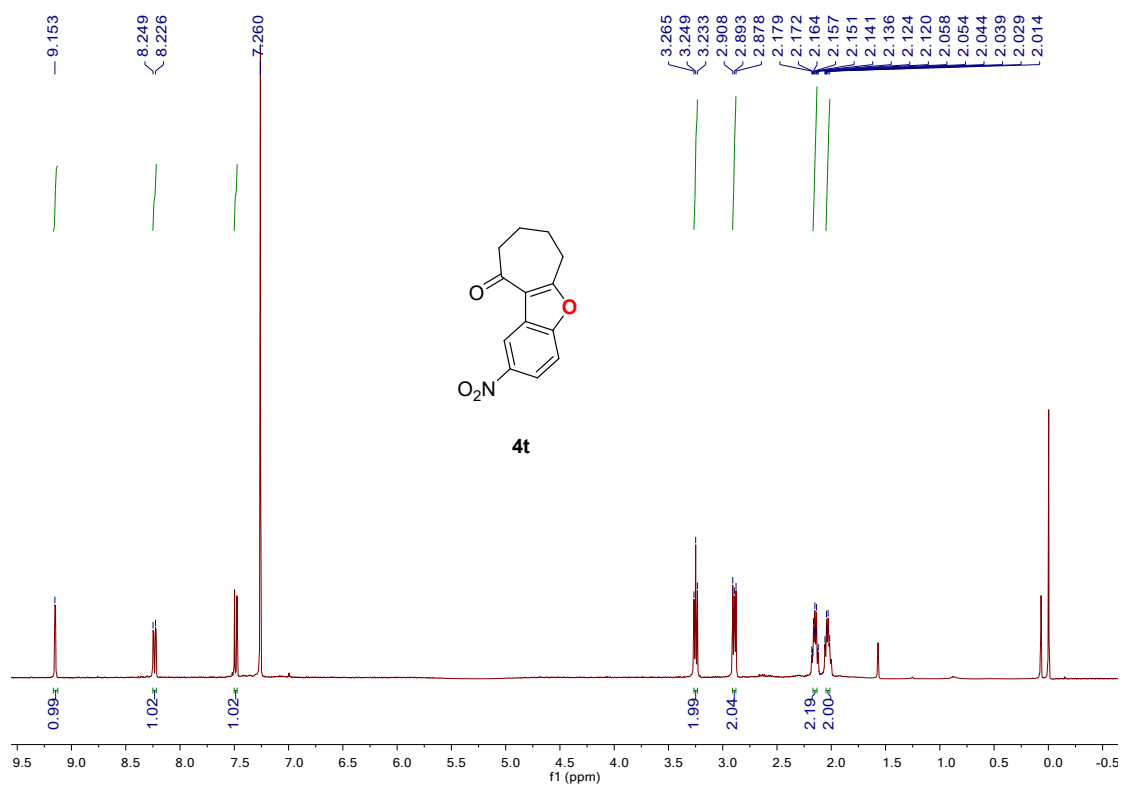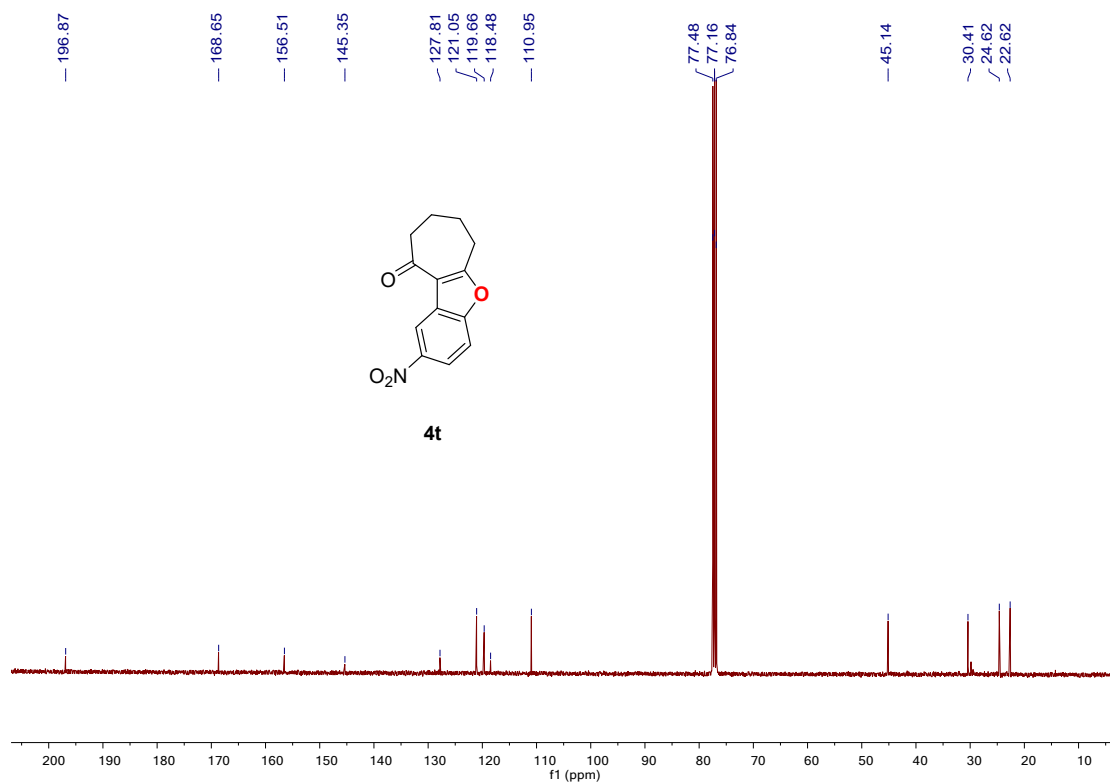

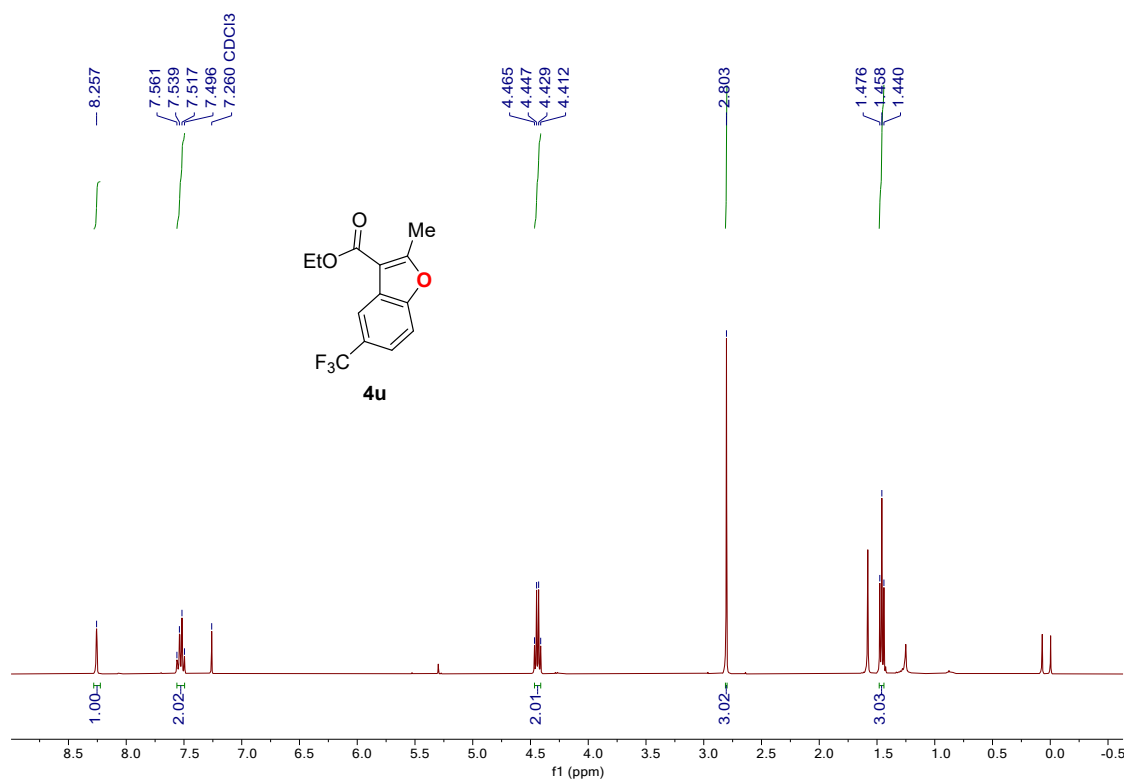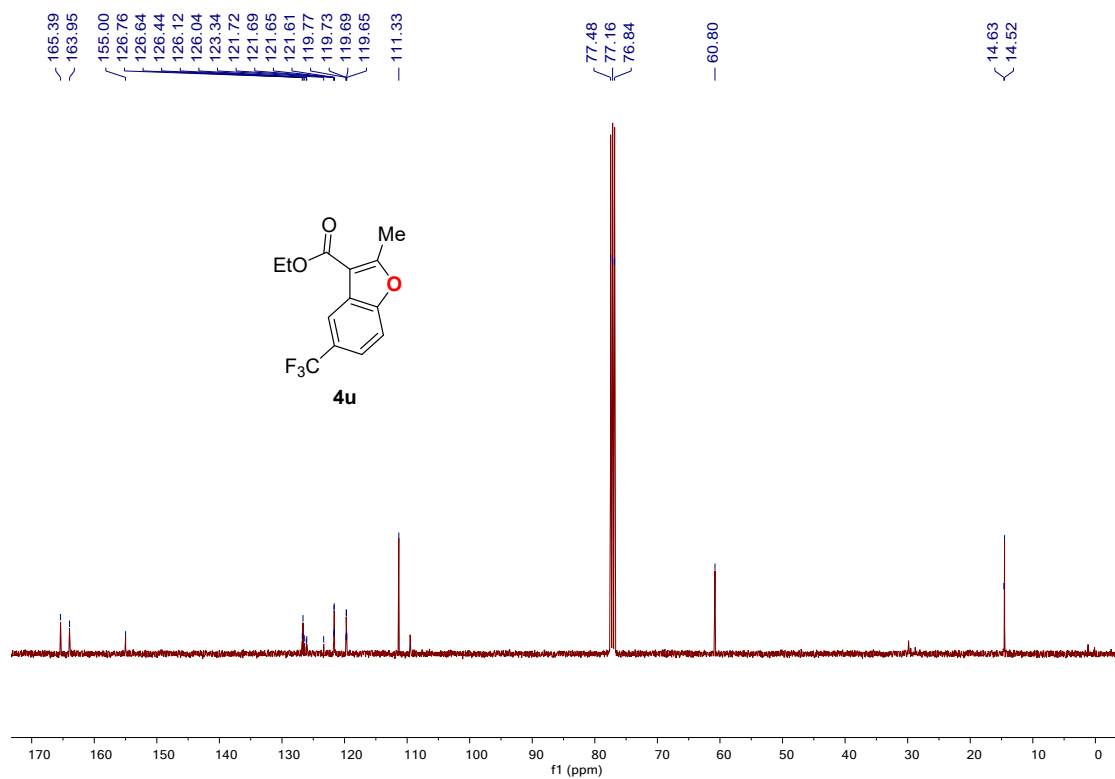

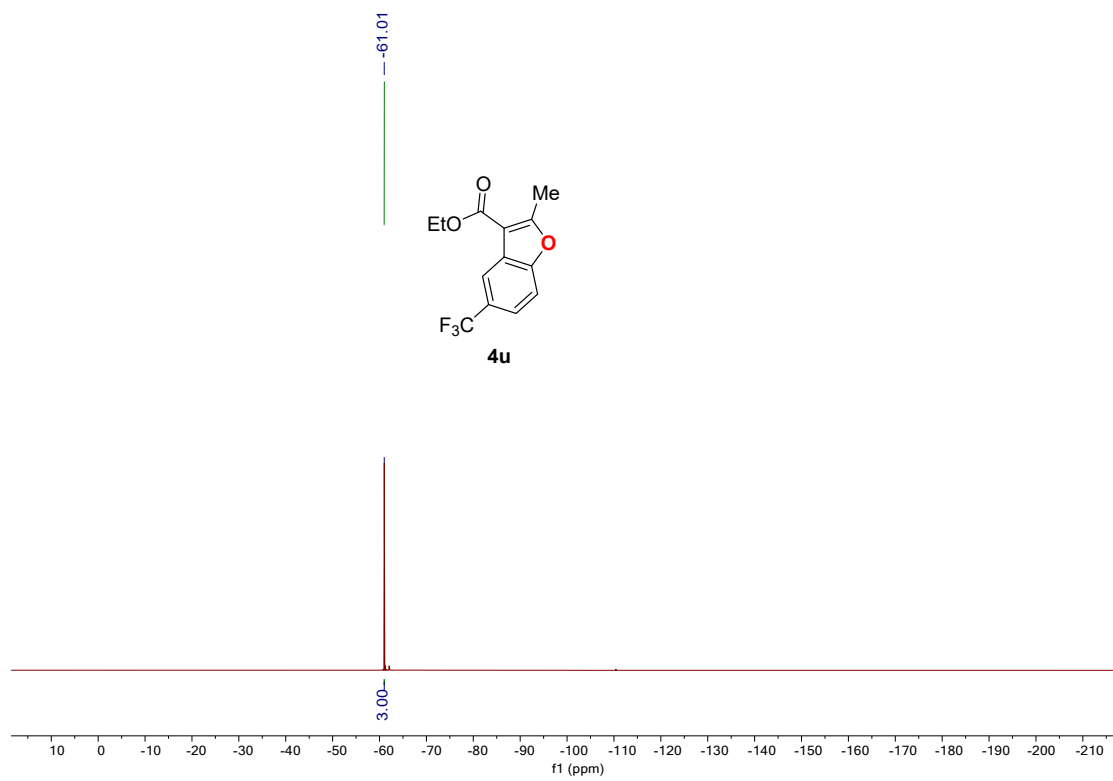

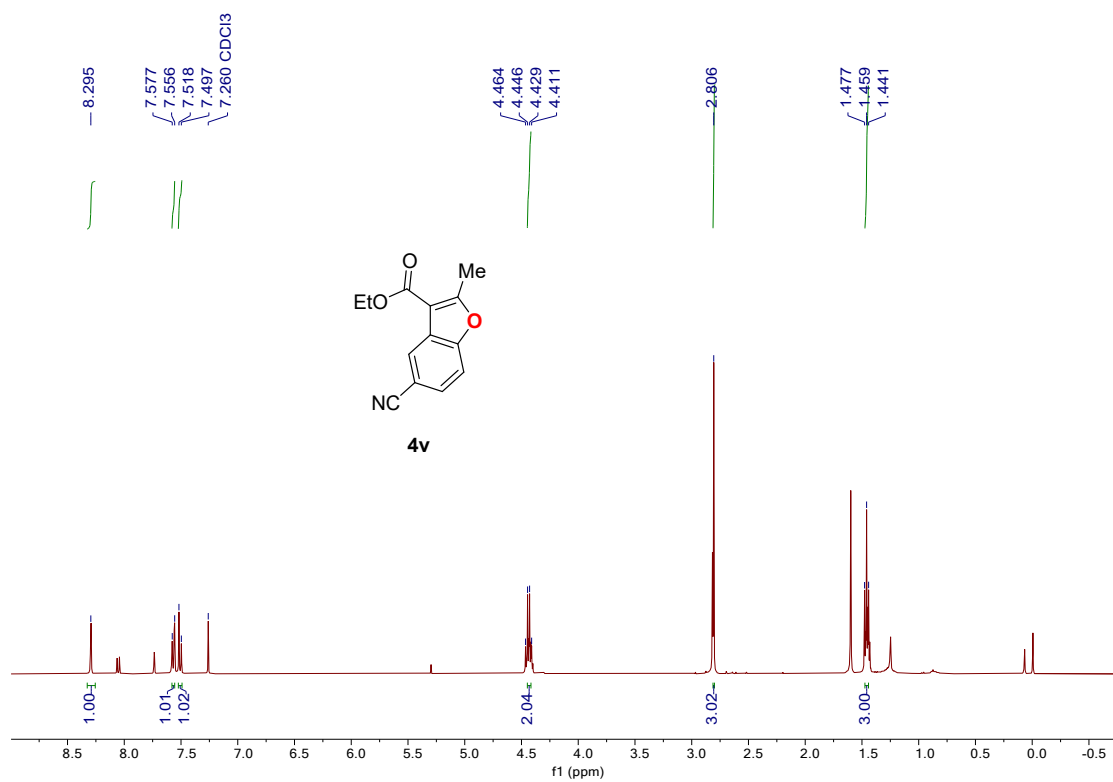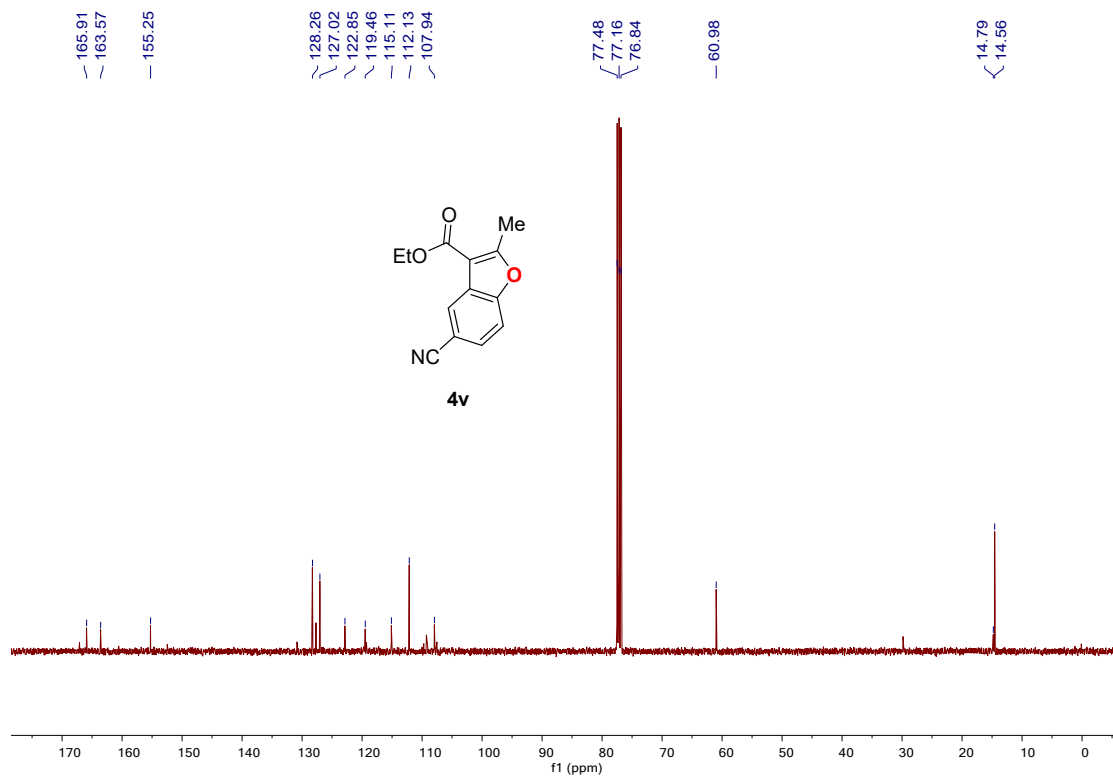

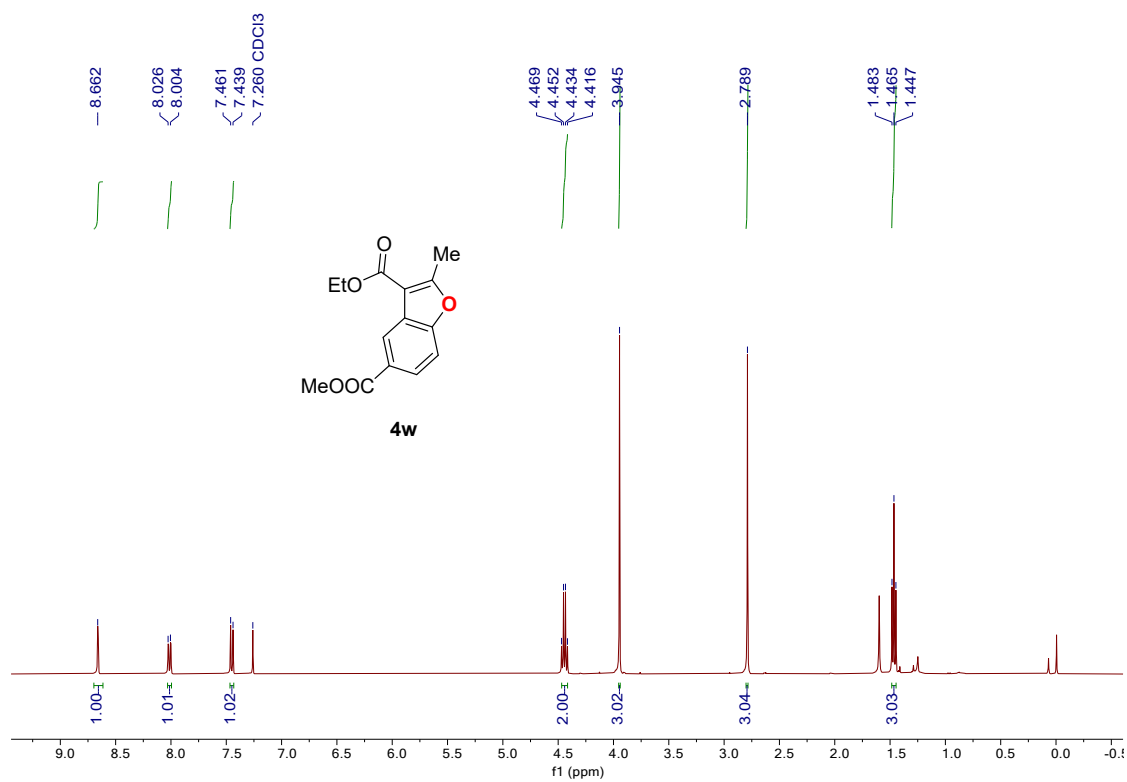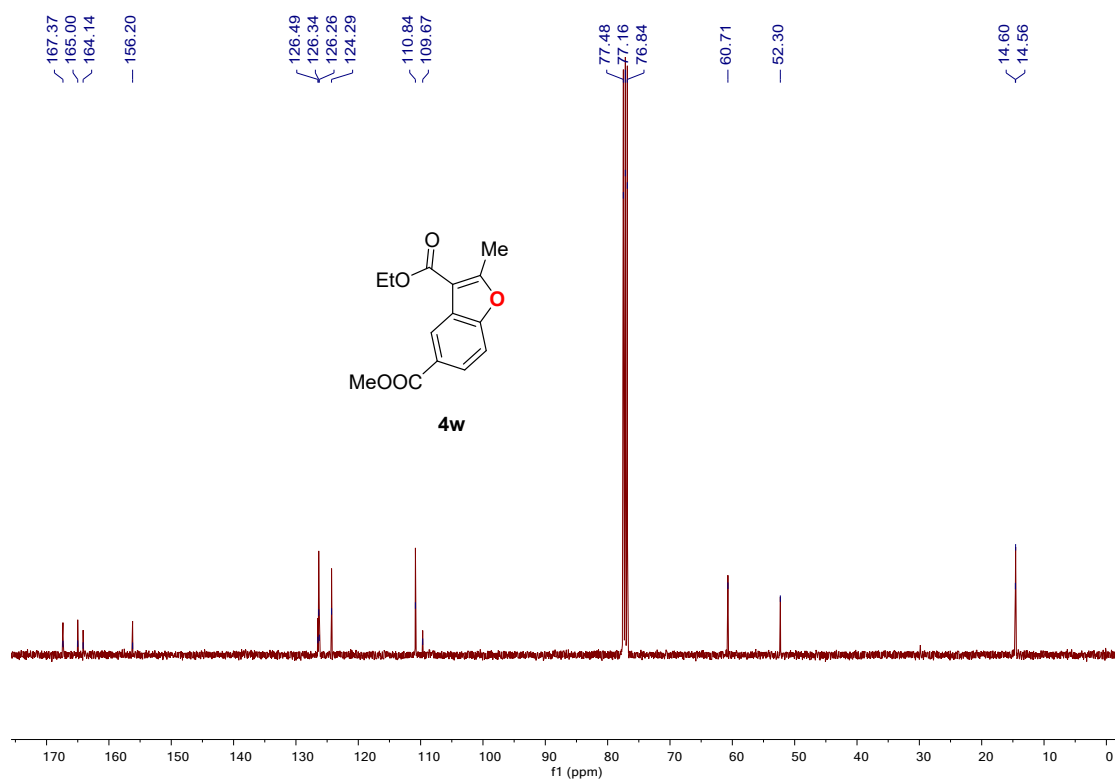

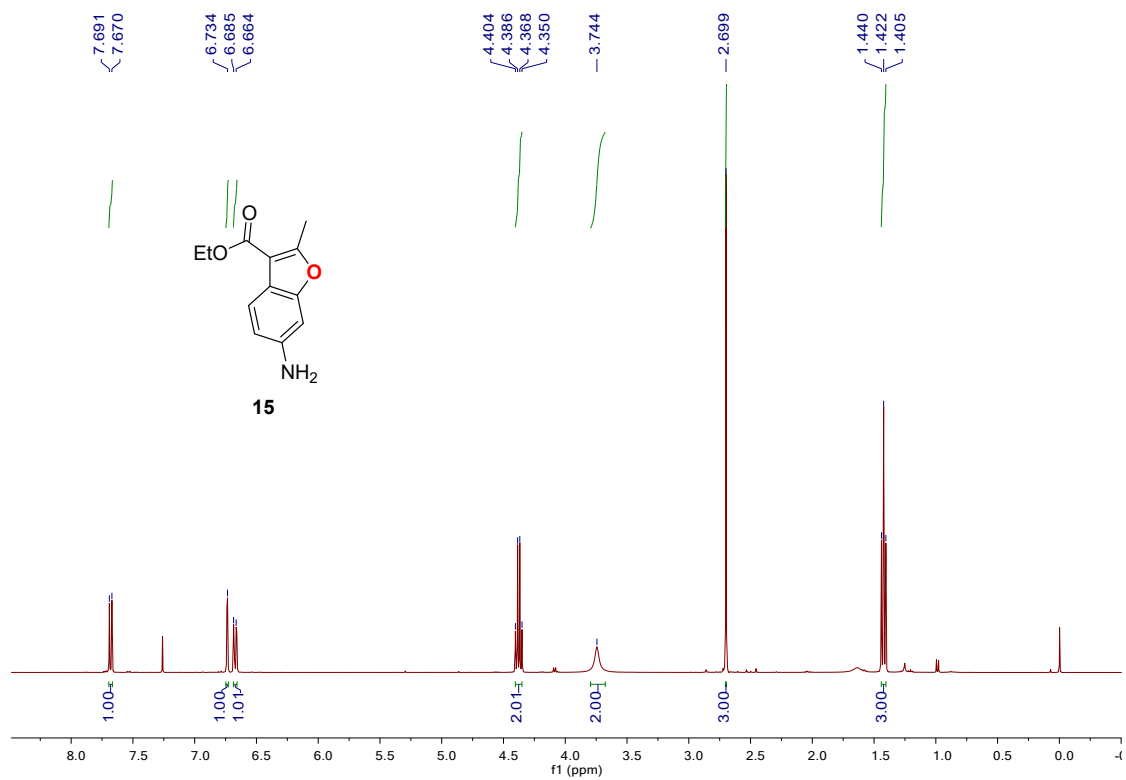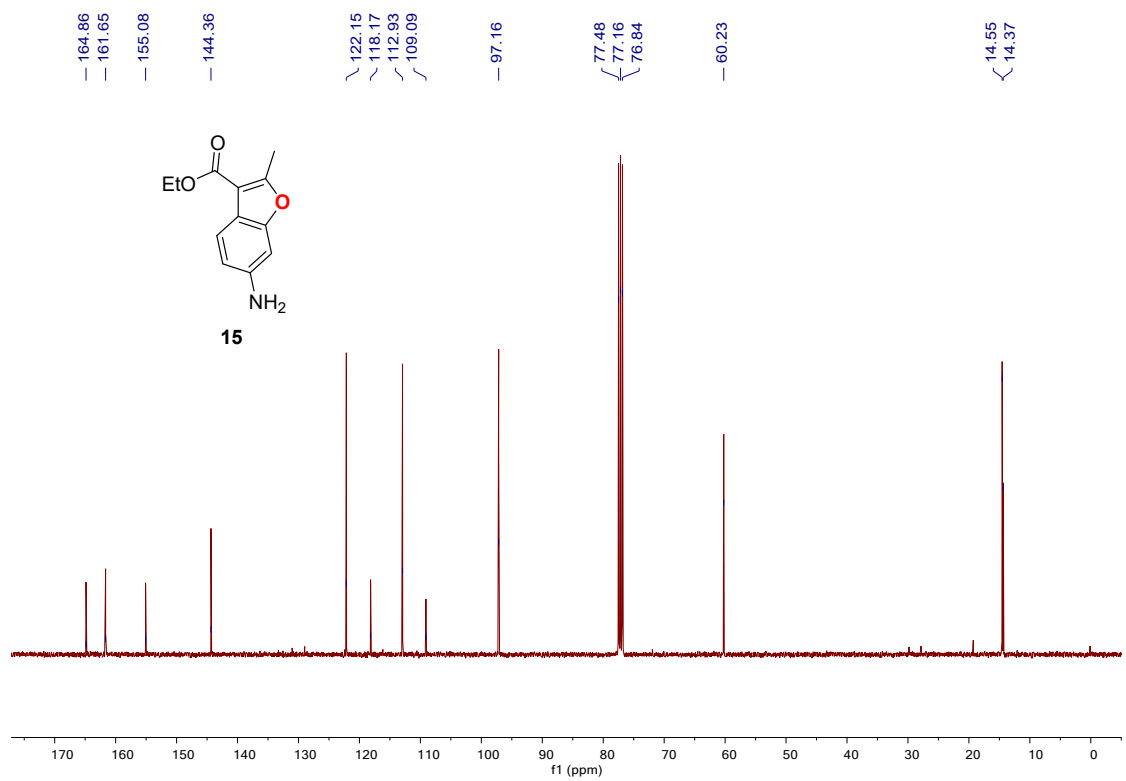

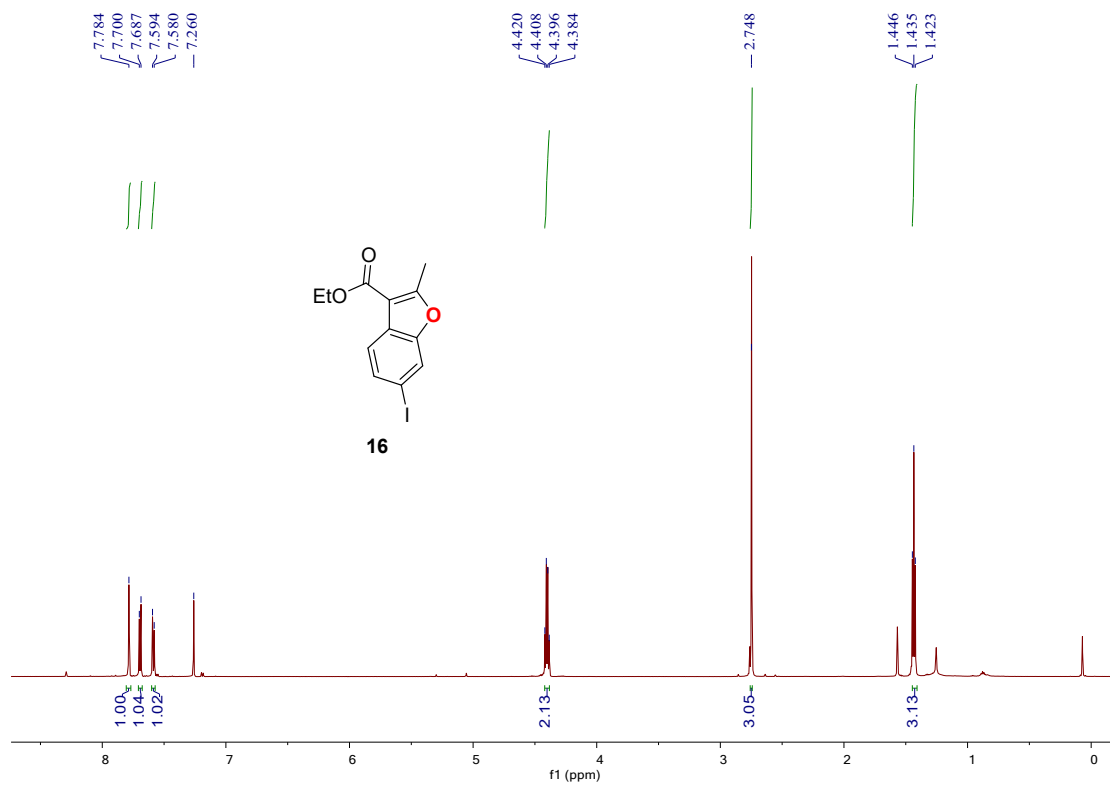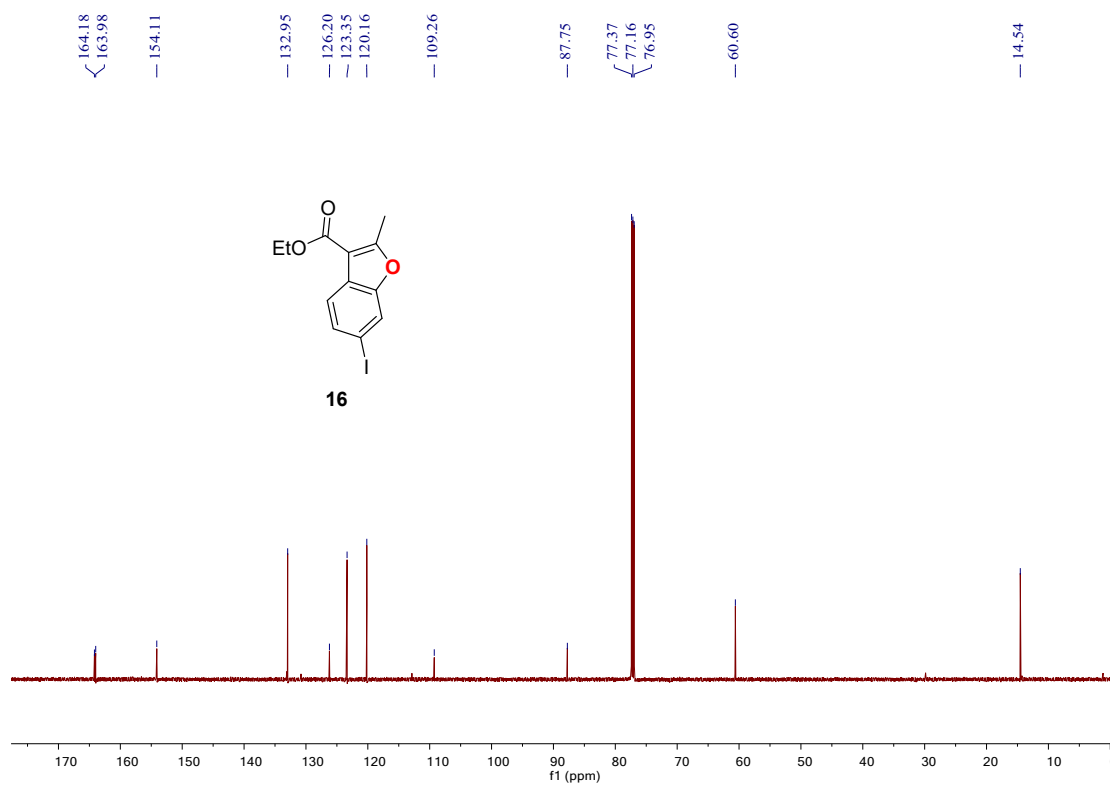

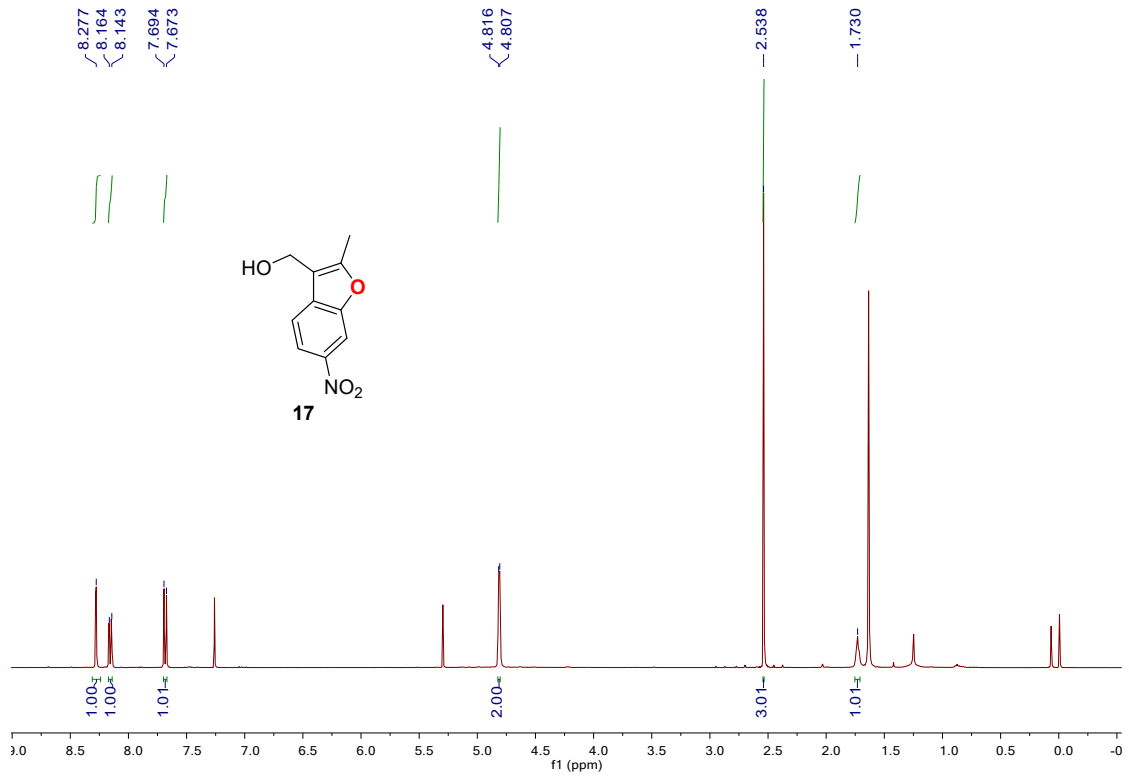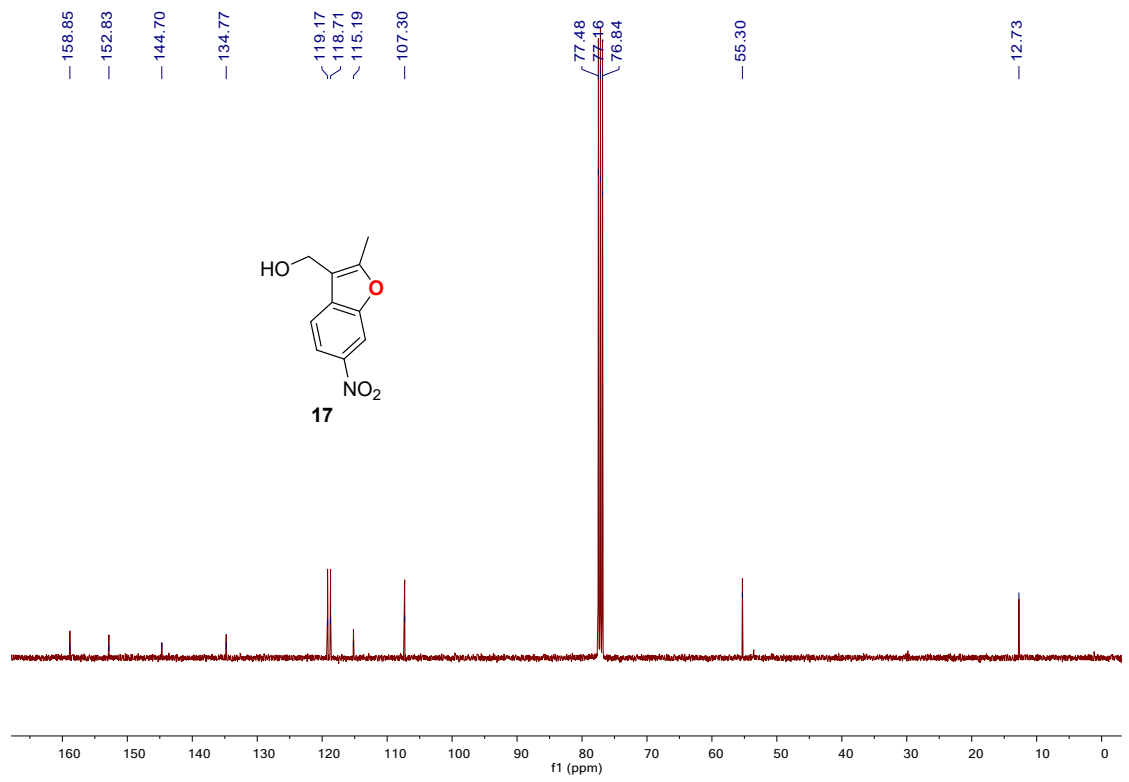



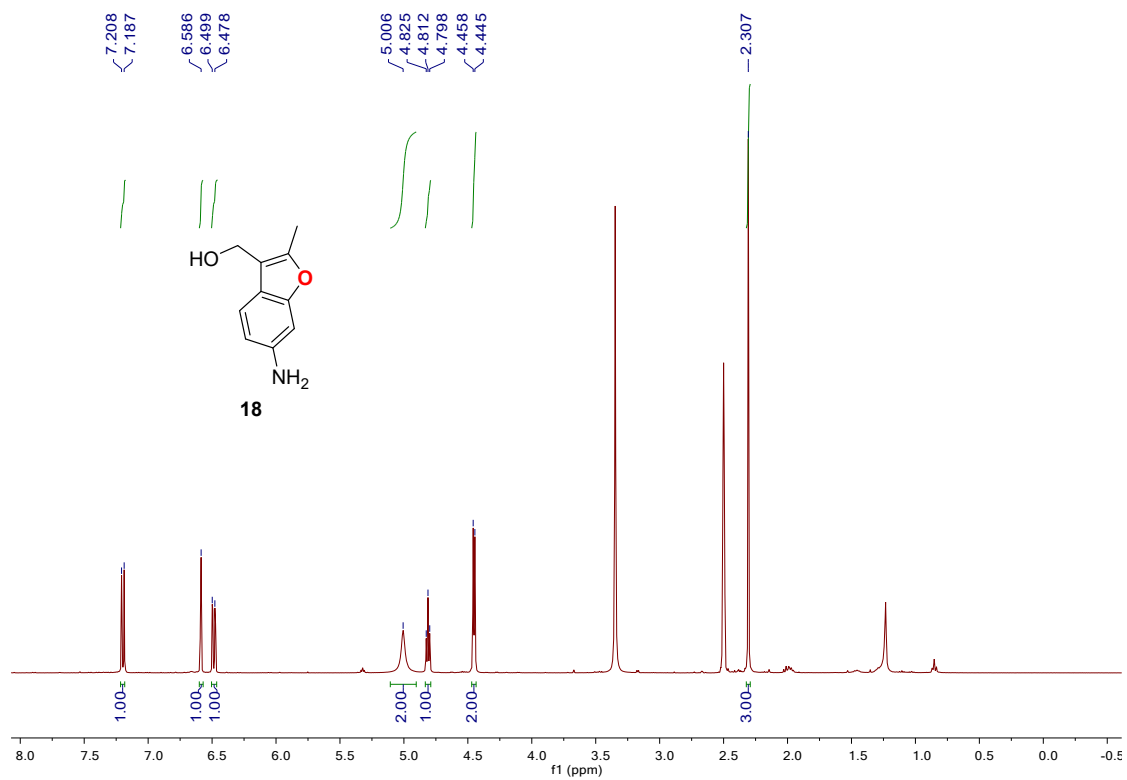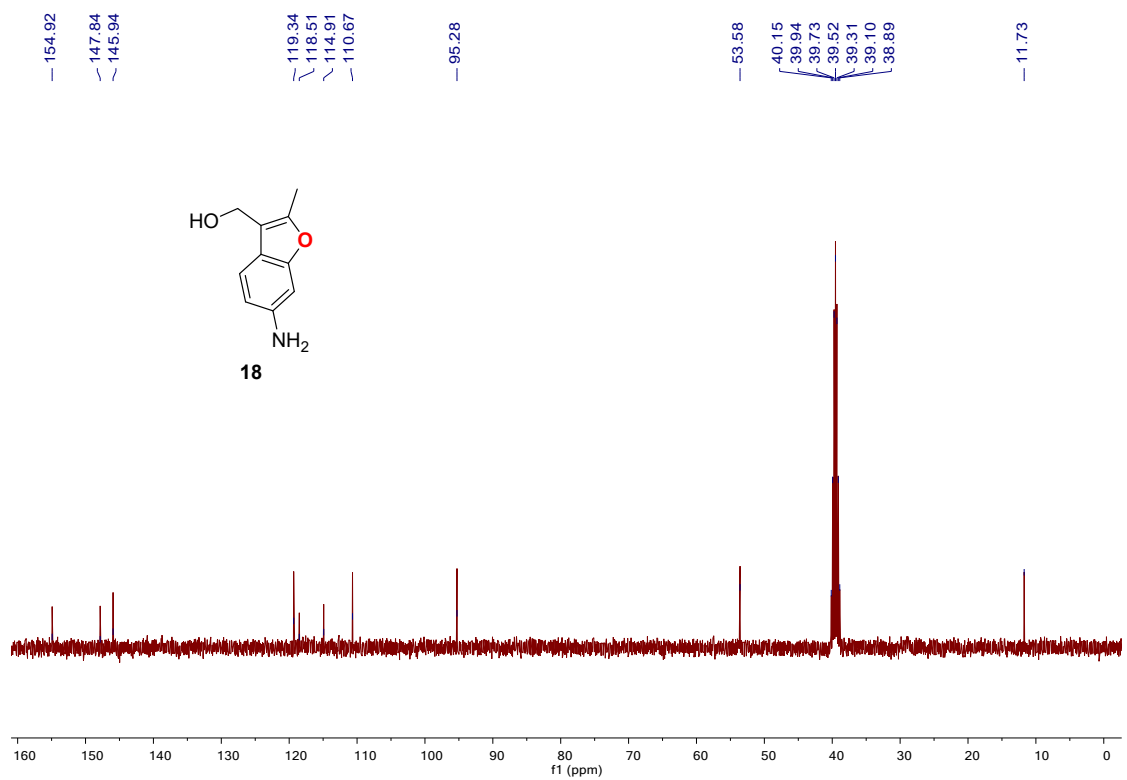

Supplement: d4cc06376g1.pdf [file d4cc06376g1.pdf]
